# Supplementary material for: Four New Highly Oxygenated Eremophilane Sesquiterpenes from an Endophytic Fungus Boeremia exigua Isolated from Fritillaria hupehensis
Source: MDPI journal article supplement (doi:10.3390/jof8050492), 2022-05-08

*Supplementary materials for*

**Four New Highly Oxygenated Eremophilane Sesquiterpenes  
from an Endophytic Fungus *Boeremia exigua* Isolated from  
*Fritillaria hupehensis***

Hong-Lian Ai,<sup>⊥</sup> Xiao Lv,<sup>⊥</sup> Ke Ye, Meng-Xi, Wang, Rong Huang, Bao-Bao Shi,\* and Zheng-Hui Li\*

School of Pharmaceutical Sciences, South-Central MinZu University, Wuhan 430074, People's  
Republic of China

\*Corresponding Author.

E-mail: shibb0505@163.com (B. B. Shi); lizhenghui@mail.scuec.edu.cn (Z. H. Li)

## Table of Contents

|                                                                                                                           |    |
|---------------------------------------------------------------------------------------------------------------------------|----|
| <b>Quantum chemical calculation</b>                                                                                       | 4  |
| <b>1 NMR computational details for compound 1</b>                                                                         | 4  |
| Table S1. DP4+ analysis results of <b>1a</b> (Isomer 1) and <b>1b</b> (Isomer 2).                                         | 5  |
| Table S2. Experimental and calculated <sup>13</sup> C NMR chemical shifts of <b>1a</b> and <b>1b</b> .                    | 6  |
| <b>2 ECD computational details of compound 1</b>                                                                          | 6  |
| Figure S1. Experimental ECD spectra and calculated ECD spectra of <b>1</b> .                                              | 6  |
| Table S3. Important thermodynamic parameters of the M06-2X/def2-SVP optimized conformers of <b>1a</b> in the gas phase.   | 6  |
| Table S4. Conformational analysis of the M06-2X/def2-SVP optimized conformers of <b>1a</b> in the gas phase (T=298.15 K). | 7  |
| <b>3 ECD computational details of compound 2</b>                                                                          | 7  |
| Figure S2. Experimental ECD spectra and calculated ECD spectra of <b>2</b> .                                              | 7  |
| Table S5. Important thermodynamic parameters of the M06-2X/def2-SVP optimized conformers of <b>2</b> in the gas phase.    | 7  |
| Table S6. Conformational analysis of the M06-2X/def2-SVP optimized conformers of <b>2</b> in the gas phase (T=298.15 K).  | 8  |
| <b>4 ECD computational details of compound 3</b>                                                                          | 8  |
| Figure S3. Experimental ECD spectra and calculated ECD spectra of <b>3</b> .                                              | 8  |
| Table S7. Important thermodynamic parameters of the M06-2X/def2-SVP optimized conformers of <b>3</b> in the gas phase.    | 8  |
| Table S8. Conformational analysis of the M06-2X/def2-SVP optimized conformers of <b>3</b> in the gas phase (T=298.15 K).  | 9  |
| <b>5 ECD computational details of compound 4</b>                                                                          | 9  |
| Figure S4. Experimental ECD spectra and calculated ECD spectra of <b>4</b> .                                              | 9  |
| Table S9. Important thermodynamic parameters of the M06-2X/def2-SVP optimized conformers of <b>4</b> in the gas phase.    | 9  |
| Table S10. Conformational analysis of the M06-2X/def2-SVP optimized conformers of <b>4</b> in the gas phase (T=298.15 K). | 10 |
| Table S11. Cartesian coordinates for the low-energy optimized conformers of <b>1-4</b> at M06-2X/def2-SVP level.          | 10 |
| <b>Spectroscopic data</b>                                                                                                 | 27 |
| Figure S5. <sup>1</sup> H NMR spectrum of <b>1</b> in CD <sub>3</sub> OD                                                  | 27 |
| Figure S6 <sup>13</sup> C NMR spectrum of <b>1</b> in CD <sub>3</sub> OD                                                  | 28 |
| Figure S7 HSQC spectrum of <b>1</b> in CD <sub>3</sub> OD                                                                 | 29 |
| Figure S8 HMBC spectrum of <b>1</b> in CD <sub>3</sub> OD                                                                 | 30 |
| Figure S9 COSY spectrum of <b>1</b> in CD <sub>3</sub> OD                                                                 | 31 |
| Figure S10 ROESY spectrum of <b>1</b> in CD <sub>3</sub> OD                                                               | 32 |
| Figure S11 HRMS spectrum of <b>1</b>                                                                                      | 33 |
| Figure S12 <sup>1</sup> H NMR spectrum of <b>2</b> in CD <sub>3</sub> OD                                                  | 34 |
| Figure S13 <sup>13</sup> C NMR spectrum of <b>2</b> in CD <sub>3</sub> OD                                                 | 35 |
| Figure S14 HSQC spectrum of <b>2</b> in CD <sub>3</sub> OD                                                                | 36 |
| Figure S15 HMBC spectrum of <b>2</b> in CD <sub>3</sub> OD                                                                | 37 |

|                                                                                 |    |
|---------------------------------------------------------------------------------|----|
| Figure S16 COSY spectrum of <b>2</b> in CD <sub>3</sub> OD.....                 | 38 |
| Figure S17 Roesy spectrum of <b>2</b> in CD <sub>3</sub> OD .....               | 39 |
| Figure S18 HRMS spectrum of <b>2</b> .....                                      | 40 |
| Figure S19 <sup>1</sup> H NMR spectrum of <b>3</b> in CD <sub>3</sub> OD .....  | 41 |
| Figure S20 <sup>13</sup> C NMR spectrum of <b>3</b> in CD <sub>3</sub> OD ..... | 42 |
| Figure S21 HSQC spectrum of <b>3</b> in CD <sub>3</sub> OD.....                 | 43 |
| Figure S22 HMBC spectrum of <b>3</b> in CD <sub>3</sub> OD.....                 | 44 |
| Figure S23 COSY spectrum of <b>3</b> in CD <sub>3</sub> OD .....                | 45 |
| Figure S24 Roesy spectrum of <b>3</b> in CD <sub>3</sub> OD .....               | 46 |
| Figure S25 HRMS spectrum of <b>3</b> .....                                      | 47 |
| Figure S26 <sup>1</sup> H NMR spectrum of <b>4</b> in CD <sub>3</sub> OD .....  | 48 |
| Figure S27 <sup>13</sup> C NMR spectrum of <b>4</b> in CD <sub>3</sub> OD ..... | 49 |
| Figure S28 HSQC spectrum of <b>4</b> in CD <sub>3</sub> OD.....                 | 50 |
| Figure S29 HMBC spectrum of <b>4</b> in CD <sub>3</sub> OD.....                 | 51 |
| Figure S30 COSY spectrum of <b>4</b> in CD <sub>3</sub> OD .....                | 52 |
| Figure S31 Roesy spectrum of <b>4</b> in CD <sub>3</sub> OD .....               | 53 |
| Figure S32 HRMS spectrum of <b>4</b> .....                                      | 54 |
| Figure S33 CD spectrum of <b>1-4</b> in MeOH .....                              | 55 |

## Quantum chemical calculation

The initial conformational analysis of the compound **1-4** were executed by employing Monte Carlo searching algorithm via the MMFF94 molecular mechanics force field, with the aid of the SPARTAN'16 program package, leading to afford a panel of relatively favored conformations in an energy range of 3 kcal/mol above the global minimum. The force field minimum energy conformers thus obtained were subsequently optimized by applying the density functional theory (DFT) with the M06-2X/def2-SVP level in vacuum, implemented in the Gaussian 09 software package. Harmonic vibrational frequencies were also performed to confirm no imaginary frequencies of the finally optimized conformers. These predominant conformers were subjected to theoretical calculation of ECD by utilizing Time-dependent density functional theory (TDDFT) calculations at the M06-2X/def2-SVP level in MeOH using the Polarizable Continuum Model (PCM) solvent model. The energies, oscillator strengths, and rotational strengths of each conformers were carried out with Gaussian 09 software package. The oretical calculations of ECD spectra for each conformer were then approximated by the Gaussian distribution. The final ECD spectrum of the individual conformers was summed up on the basis of Boltzmann-weighted population contribution by the SpecDisv1.71. Gauge Independent Atomic Orbital (GIAO) calculations of their  $^1\text{H}$  and  $^{13}\text{C}$  NMR chemical shifts using density functional theory (DFT) at the mPW1PW91/6-311+G(d,p) level with the PCM model in methanol. The calculated NMR data of these conformers were averaged according to the Boltzmann distribution theory and their relative Gibbs free energy. The  $^1\text{H}$  and  $^{13}\text{C}$  NMR chemical shifts for TMS were also calculated by the same procedures and used as the reference. After calculation, the experimental and calculated data were evaluated by the improved probability DP4+ method.

### 1 NMR computational details for compound 1

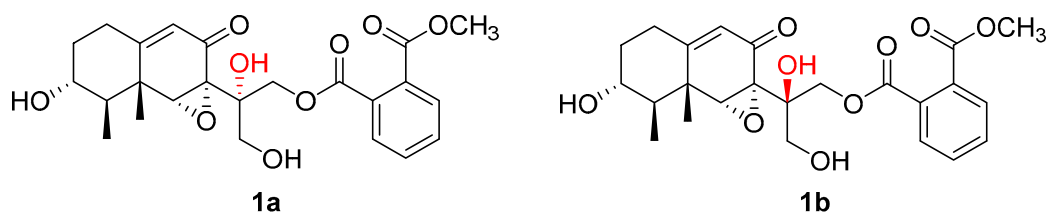

Table S1. DP4+ analysis results of **1a** (Isomer 1) and **1b** (Isomer 2).

| Functional<br>mPW1PW91 |      | Solvent?<br>PCM | Basis Set<br>6-311+G(d,p) |          | Type of Data<br>Unscaled Shifts |          |          |
|------------------------|------|-----------------|---------------------------|----------|---------------------------------|----------|----------|
|                        |      | DP4+            | 100.00%                   | 0.00%    | –                               | –        | –        |
| Nuclei                 | sp2? | Experimental    | Isomer 1                  | Isomer 2 | Isomer 3                        | Isomer 4 | Isomer 5 |
| C                      | x    | 121.8           | 122.3                     | 121.4    |                                 |          |          |
| C                      |      | 73.9            | 72.5                      | 73.3     |                                 |          |          |
| C                      |      | 69.2            | 69.0                      | 67.3     |                                 |          |          |
| C                      |      | 65.6            | 62.9                      | 64.6     |                                 |          |          |
| C                      |      | 11.6            | 12.9                      | 11.8     |                                 |          |          |
| C                      |      | 18.3            | 19.0                      | 19.4     |                                 |          |          |
| C                      |      | 36.2            | 38.1                      | 37.9     |                                 |          |          |
| C                      | x    | 169.5           | 166.7                     | 166.3    |                                 |          |          |
| C                      | x    | 134.3           | 134.5                     | 132.7    |                                 |          |          |
| C                      | x    | 129.7           | 131.0                     | 131.1    |                                 |          |          |
| C                      | x    | 132.9           | 132.6                     | 131.7    |                                 |          |          |
| C                      | x    | 132.8           | 131.6                     | 132.5    |                                 |          |          |
| C                      | x    | 130.3           | 130.4                     | 129.7    |                                 |          |          |
| C                      | x    | 132.3           | 132.4                     | 134.5    |                                 |          |          |
| C                      | x    | 168.9           | 168.7                     | 169.8    |                                 |          |          |
| C                      |      | 71.1            | 70.4                      | 70.5     |                                 |          |          |
| C                      |      | 53.5            | 53.8                      | 53.2     |                                 |          |          |
| C                      |      | 45.9            | 45.8                      | 47.3     |                                 |          |          |
| C                      |      | 42.2            | 43.5                      | 43.9     |                                 |          |          |
| C                      | x    | 166.5           | 171.4                     | 171.8    |                                 |          |          |
| C                      |      | 31.6            | 32.8                      | 33.2     |                                 |          |          |
| C                      |      | 63.9            | 61.3                      | 61.3     |                                 |          |          |
| C                      |      | 62.9            | 61.4                      | 60.6     |                                 |          |          |
| C                      | x    | 195.5           | 195.2                     | 194.7    |                                 |          |          |
| H                      |      | 2.03            | 1.88                      | 2.36     |                                 |          |          |
| H                      |      | 1.27            | 1.19                      | 1.48     |                                 |          |          |
| H                      |      | 3.44            | 3.52                      | 3.77     |                                 |          |          |
| H                      |      | 1.63            | 1.65                      | 1.92     |                                 |          |          |
| H                      |      | 2.41            | 2.11                      | 2.53     |                                 |          |          |
| H                      |      | 2.24            | 2.61                      | 2.86     |                                 |          |          |
| H                      |      | 3.8             | 3.74                      | 4.63     |                                 |          |          |
| H                      | x    | 5.61            | 5.57                      | 6.17     |                                 |          |          |
| H                      |      | 4.64            | 4.37                      | 5.21     |                                 |          |          |
| H                      |      | 4.59            | 4.78                      | 4.37     |                                 |          |          |
| H                      |      | 4.19            | 3.63                      | 5.18     |                                 |          |          |
| H                      |      | 3.76            | 3.45                      | 3.80     |                                 |          |          |
| H                      |      | 1.16            | 1.34                      | 1.91     |                                 |          |          |
| H                      |      | 0.64            | 1.23                      | 1.14     |                                 |          |          |
| H                      | x    | 7.6             | 7.74                      | 8.51     |                                 |          |          |
| H                      | x    | 7.61            | 7.64                      | 8.33     |                                 |          |          |
| H                      | x    | 7.62            | 7.62                      | 8.42     |                                 |          |          |
| H                      | x    | 7.77            | 7.93                      | 8.38     |                                 |          |          |
| H                      |      | 3.85            | 3.84                      | 4.66     |                                 |          |          |

  

| Functional<br>mPW1PW91 |  | Solvent?<br>PCM | Basis Set<br>6-311+G(d,p) |          | Type of Data<br>Unscaled Shifts |          |          |
|------------------------|--|-----------------|---------------------------|----------|---------------------------------|----------|----------|
|                        |  | Isomer 1        | Isomer 2                  | Isomer 3 | Isomer 4                        | Isomer 5 | Isomer 6 |
| sDP4+ (H data)         |  | 94.72%          | 5.28%                     | –        | –                               | –        | –        |
| sDP4+ (C data)         |  | 99.27%          | 0.73%                     | –        | –                               | –        | –        |
| sDP4+ (all data)       |  | 99.96%          | 0.04%                     | –        | –                               | –        | –        |
| uDP4+ (H data)         |  | 100.00%         | 0.00%                     | –        | –                               | –        | –        |
| uDP4+ (C data)         |  | 68.40%          | 31.60%                    | –        | –                               | –        | –        |
| uDP4+ (all data)       |  | 100.00%         | 0.00%                     | –        | –                               | –        | –        |
| DP4+ (H data)          |  | 100.00%         | 0.00%                     | –        | –                               | –        | –        |
| DP4+ (C data)          |  | 99.66%          | 0.34%                     | –        | –                               | –        | –        |
| DP4+ (all data)        |  | 100.00%         | 0.00%                     | –        | –                               | –        | –        |

Table S2. Experimental and calculated  $^{13}\text{C}$  NMR chemical shifts of **1a** and **1b**.

| Num. | Exp.  | <b>1a</b> | <b>1b</b> | Num.           | Exp.  | <b>1a</b>     | <b>1b</b> |
|------|-------|-----------|-----------|----------------|-------|---------------|-----------|
| 1    | 121.8 | 122.3     | 121.4     | 15             | 168.9 | 168.7         | 169.8     |
| 2    | 73.9  | 72.5      | 73.3      | 16             | 71.1  | 70.4          | 70.5      |
| 3    | 69.2  | 69.0      | 67.3      | 17             | 53.5  | 53.8          | 53.2      |
| 4    | 65.6  | 62.9      | 64.6      | 18             | 45.9  | 45.8          | 47.3      |
| 5    | 11.6  | 12.9      | 11.8      | 19             | 42.2  | 43.5          | 43.9      |
| 6    | 18.3  | 19.0      | 19.4      | 20             | 166.5 | 171.4         | 171.8     |
| 7    | 36.2  | 38.1      | 37.9      | 21             | 31.6  | 32.8          | 33.2      |
| 8    | 169.5 | 166.7     | 166.3     | 22             | 63.9  | 61.3          | 61.3      |
| 9    | 134.3 | 134.5     | 132.7     | 23             | 62.9  | 61.4          | 60.6      |
| 10   | 129.7 | 131.0     | 131.1     | 24             | 195.5 | 195.2         | 194.7     |
| 11   | 132.9 | 132.6     | 131.7     | R <sup>2</sup> |       | <b>0.9991</b> | 0.9988    |
| 12   | 132.8 | 131.6     | 132.5     | MAE            |       | 2.6428        | 3.3397    |
| 13   | 130.3 | 130.4     | 129.7     | RMSD           |       | 1.6257        | 1.8275    |
| 14   | 132.3 | 132.4     | 134.5     |                |       |               |           |

## 2 ECD computational details of compound **1**

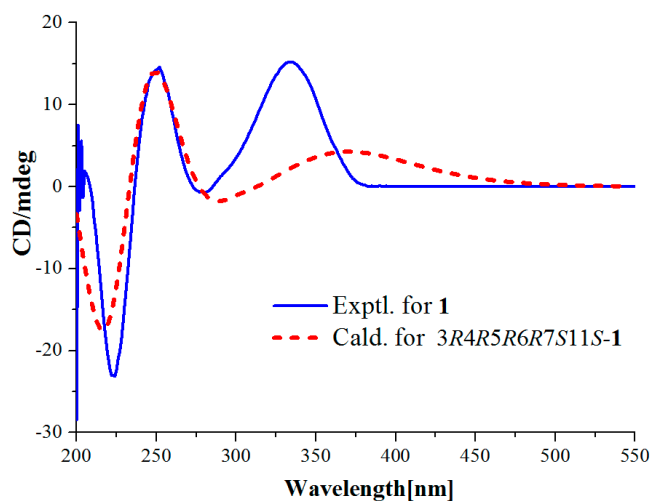Figure S1. Experimental ECD spectra and calculated ECD spectra of **1**.Table S3. Important thermodynamic parameters of the M06-2X/def2-SVP optimized conformers of **1a** in the gas phase

| Conformers  | E <sup>a</sup> (Hartree) | C <sup>b</sup> (Hartree) | G <sup>c</sup> (kcal/mol) |
|-------------|--------------------------|--------------------------|---------------------------|
| <b>1a_1</b> | -1606.598579             | 0.442916                 | -1007867.497250           |
| <b>1a_2</b> | -1606.598449             | 0.442945                 | -1007867.397478           |
| <b>1a_3</b> | -1606.59598              | 0.442534                 | -1007866.106076           |
| <b>1a_4</b> | -1606.59598              | 0.442543                 | -1007866.100366           |
| <b>1a_5</b> | -1606.595358             | 0.442541                 | -1007865.711126           |

<sup>a</sup>Electronic energy; <sup>b</sup>Thermal correction to Gibbs free energy ; <sup>c</sup>Gibbs free energy (E + C).

Table S4. Conformational analysis of the M06-2X/def2-SVP optimized conformers of **1a** in the gas phase (T=298.15 K)

| Conformers  | $\Delta G$ (kcal/mol) <sup>a</sup> | Population <sup>b</sup> |
|-------------|------------------------------------|-------------------------|
| <b>1a_1</b> | 0.000000                           | 47.99%                  |
| <b>1a_2</b> | 0.099773                           | 40.55%                  |
| <b>1a_3</b> | 1.391802                           | 4.57%                   |
| <b>1a_4</b> | 1.397449                           | 4.53%                   |
| <b>1a_5</b> | 1.786501                           | 2.35%                   |

<sup>a</sup>The relative Gibbs free energy; <sup>b</sup>The Boltzmann distribution of each conformer.

### 3 ECD computational details of compound **2**

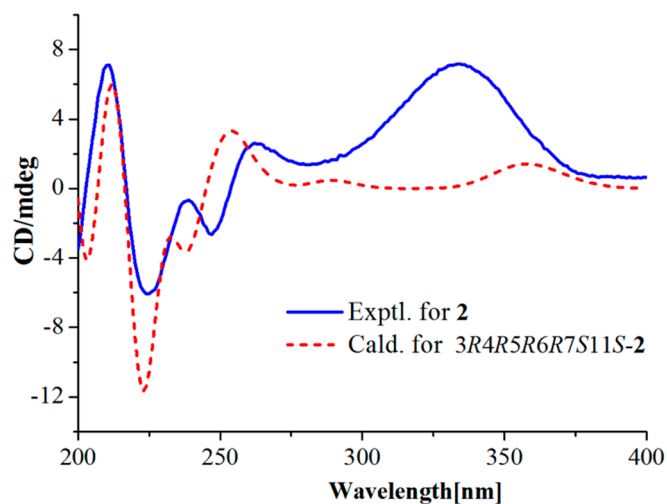

Figure S2. Experimental ECD spectra and calculated ECD spectra of **2**.

Table S5. Important thermodynamic parameters of the M06-2X/def2-SVP optimized conformers of **2** in the gas phase

| Conformers | E <sup>a</sup> (Hartree) | C <sup>b</sup> (Hartree) | G <sup>c</sup> (kcal/mol) |
|------------|--------------------------|--------------------------|---------------------------|
| <b>2_1</b> | -1454.115283             | 0.404613                 | -912207.806683            |
| <b>2_2</b> | -1454.115638             | 0.405111                 | -912207.716573            |
| <b>2_3</b> | -1454.115283             | 0.404840                 | -912207.663800            |
| <b>2_4</b> | -1454.114912             | 0.404576                 | -912207.596720            |
| <b>2_5</b> | -1454.114626             | 0.404514                 | -912207.456536            |
| <b>2_6</b> | -1454.114230             | 0.404397                 | -912207.281149            |
| <b>2_7</b> | -1454.114175             | 0.404669                 | -912207.076395            |

<sup>a</sup>Electronic energy; <sup>b</sup>Thermal correction to Gibbs free energy ; <sup>c</sup>Gibbs free energy (E + C).

Table S6. Conformational analysis of the M06-2X/def2-SVP optimized conformers of **2** in the gas phase (T=298.15 K)

| Conformers | $\Delta G$ (kcal/mol) <sup>a</sup> | Population <sup>b</sup> |
|------------|------------------------------------|-------------------------|
| <b>2_1</b> | 0.000000                           | 21.73%                  |
| <b>2_2</b> | 0.090110                           | 18.66%                  |
| <b>2_3</b> | 0.142883                           | 17.07%                  |
| <b>2_4</b> | 0.209963                           | 15.24%                  |
| <b>2_5</b> | 0.350147                           | 12.03%                  |
| <b>2_6</b> | 0.525534                           | 8.94%                   |
| <b>2_7</b> | 0.730288                           | 6.33%                   |

<sup>a</sup>The relative Gibbs free energy; <sup>b</sup>The Boltzmann distribution of each conformer.

#### 4 ECD computational details of compound **3**

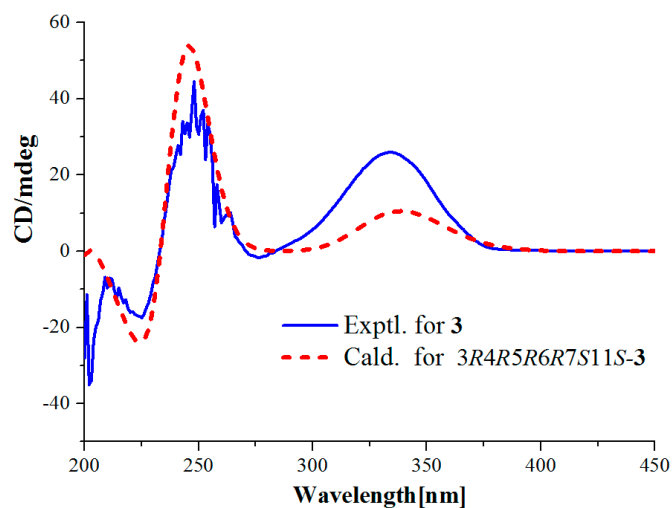

Figure S3. Experimental ECD spectra and calculated ECD spectra of **3**.

Table S7. Important thermodynamic parameters of the M06-2X/def2-SVP optimized conformers of **3** in the gas phase

| Conformers | E <sup>a</sup> (Hartree) | C <sup>b</sup> (Hartree) | G <sup>c</sup> (kcal/mol) |
|------------|--------------------------|--------------------------|---------------------------|
| <b>3_1</b> | -1454.121572             | 0.405281                 | -912211.333689            |
| <b>3_2</b> | -1454.121054             | 0.405538                 | -912210.847311            |
| <b>3_3</b> | -1454.117371             | 0.405032                 | -912208.853922            |
| <b>3_4</b> | -1454.117396             | 0.405106                 | -912208.823237            |
| <b>3_5</b> | -1454.116985             | 0.404891                 | -912208.700310            |

<sup>a</sup>Electronic energy; <sup>b</sup>Thermal correction to Gibbs free energy ; <sup>c</sup>Gibbs free energy (E + C).



Table S8. Conformational analysis of the M06-2X/def2-SVP optimized conformers of **3** in the gas phase (T=298.15 K)

| Conformers | $\Delta G$ (kcal/mol) <sup>a</sup> | Population <sup>b</sup> |
|------------|------------------------------------|-------------------------|
| <b>3_1</b> | 0.000000                           | 67.52%                  |
| <b>3_2</b> | 0.486378                           | 29.69%                  |
| <b>3_3</b> | 2.479767                           | 1.02%                   |
| <b>3_4</b> | 2.510452                           | 0.97%                   |
| <b>3_5</b> | 2.633379                           | 0.79%                   |

<sup>a</sup>The relative Gibbs free energy; <sup>b</sup>The Boltzmann distribution of each conformer.

## 5 ECD computational details of compound **4**

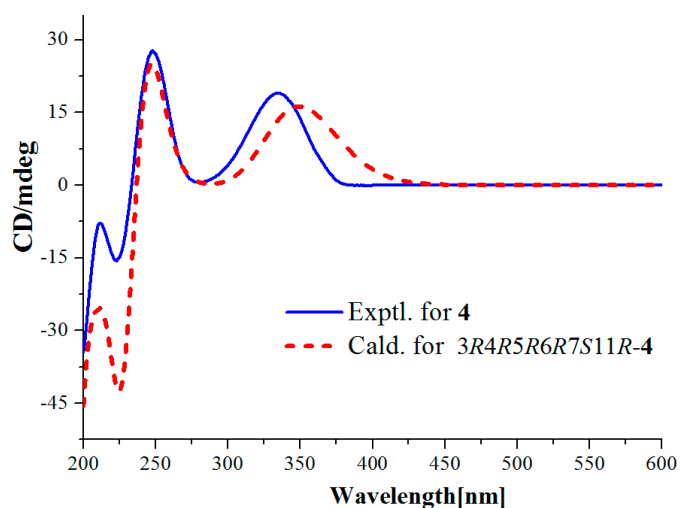

Figure S4. Experimental ECD spectra and calculated ECD spectra of **4**.

Table S9. Important thermodynamic parameters of the M06-2X/def2-SVP optimized conformers of **4** in the gas phase

| Conformers | E <sup>a</sup> (Hartree) | C <sup>b</sup> (Hartree) | G <sup>c</sup> (kcal/mol) |
|------------|--------------------------|--------------------------|---------------------------|
| <b>4_1</b> | -1111.065458             | 0.324859                 | -696993.057969            |
| <b>4_2</b> | -1111.065133             | 0.324707                 | -696992.949599            |
| <b>4_3</b> | -1111.061775             | 0.324333                 | -696991.077318            |
| <b>4_4</b> | -1111.061525             | 0.324398                 | -696990.879529            |
| <b>4_5</b> | -1111.061126             | 0.325496                 | -696989.939781            |
| <b>4_6</b> | -1111.058664             | 0.323275                 | -696989.788866            |

<sup>a</sup>Electronic energy; <sup>b</sup>Thermal correction to Gibbs free energy ; <sup>c</sup>Gibbs free energy (E + C).

Table S10. Conformational analysis of the M06-2X/def2-SVP optimized conformers of **4** in the gas phase (T=298.15 K)

| Conformers | $\Delta G$ (kcal/mol) <sup>a</sup> | Population <sup>b</sup> |
|------------|------------------------------------|-------------------------|
| <b>4_1</b> | 0.000000                           | 52.56%                  |
| <b>4_2</b> | 0.108370                           | 43.77%                  |
| <b>4_3</b> | 1.980650                           | 1.85%                   |
| <b>4_4</b> | 2.178439                           | 1.33%                   |
| <b>4_5</b> | 3.118188                           | 0.27%                   |
| <b>4_6</b> | 3.269102                           | 0.21%                   |

<sup>a</sup>The relative Gibbs free energy; <sup>b</sup>The Boltzmann distribution of each conformer.

Table S11. Cartesian coordinates for the low-energy optimized conformers of **1-4** at M06-2X/def2-SVP level.

| Conformer <b>1a_1</b> |           |           |           |   |           |           |           |
|-----------------------|-----------|-----------|-----------|---|-----------|-----------|-----------|
| C                     | 3.813507  | -2.167609 | 1.672918  | C | -0.17331  | -1.812801 | -2.600849 |
| C                     | 4.137678  | -2.014072 | 0.194551  | O | 1.455004  | 3.825742  | -1.175527 |
| C                     | 3.075336  | -1.184588 | -0.530326 | H | 4.596367  | -2.763237 | 2.170226  |
| C                     | 2.820246  | 0.204901  | 0.136454  | H | 2.866455  | -2.723197 | 1.762109  |
| C                     | 2.648075  | 0.034432  | 1.6392    | H | 5.113317  | -1.492316 | 0.096363  |
| C                     | 3.690018  | -0.797845 | 2.335704  | H | 2.12925   | -1.745179 | -0.417978 |
| C                     | 1.566643  | 0.765918  | -0.502885 | H | 3.444206  | -0.890163 | 3.401706  |
| C                     | 0.478136  | 1.419105  | 0.247573  | H | 4.663476  | -0.280695 | 2.272913  |
| C                     | 0.651241  | 1.513818  | 1.743047  | H | 1.670516  | 1.097119  | -1.540589 |
| C                     | 1.658893  | 0.617246  | 2.336711  | H | 1.608595  | 0.523532  | 3.423783  |
| O                     | 0.021852  | 2.303343  | 2.413142  | H | -2.475791 | 3.015593  | -0.565427 |
| O                     | 0.362169  | 0.091133  | -0.235474 | H | -1.786789 | 3.06384   | 1.09709   |
| C                     | -0.396858 | 2.453321  | -0.46871  | H | 0.526931  | 4.086188  | 0.616187  |
| C                     | -1.793077 | 2.524202  | 0.141707  | H | -0.449447 | 4.575477  | -0.796653 |
| C                     | 0.275049  | 3.828088  | -0.421287 | H | -1.007365 | 1.311001  | -1.940317 |
| O                     | -0.474561 | 2.120783  | -1.83399  | H | 3.446084  | -2.108574 | -2.440647 |
| C                     | 3.417668  | -1.097272 | -2.017393 | H | 4.410701  | -0.647965 | -2.169671 |
| C                     | 3.950684  | 1.216986  | -0.123395 | H | 2.685641  | -0.504348 | -2.582328 |
| O                     | 4.188841  | -3.265708 | -0.451582 | H | 3.707447  | 2.176929  | 0.353401  |
| O                     | -2.213434 | 1.182439  | 0.365349  | H | 4.917986  | 0.865846  | 0.262047  |
| C                     | -3.512193 | 0.898127  | 0.26672   | H | 4.059163  | 1.403805  | -1.200864 |
| C                     | -3.754861 | -0.579024 | 0.395461  | H | 4.860331  | -3.804964 | -0.020848 |
| O                     | -4.381824 | 1.717243  | 0.169166  | H | -5.372392 | -0.201376 | 1.746442  |
| C                     | -4.775087 | -0.973274 | 1.259189  | H | -5.806638 | -2.623263 | 2.18695   |
| C                     | -5.010778 | -2.325553 | 1.503002  | H | -4.403649 | -4.350728 | 1.067834  |
| C                     | -4.226528 | -3.291569 | 0.877131  | H | -2.621225 | -3.651354 | -0.528393 |

|   |           |           |           |   |           |           |           |
|---|-----------|-----------|-----------|---|-----------|-----------|-----------|
| C | -3.222716 | -2.905545 | -0.009319 | H | 0.289559  | -0.831738 | -2.436532 |
| C | -2.987629 | -1.553027 | -0.266117 | H | 0.580082  | -2.60603  | -2.566925 |
| C | -2.022015 | -1.167798 | -1.34165  | H | -0.690249 | -1.810129 | -3.570369 |
| O | -2.117734 | -0.160569 | -2.002835 | H | 1.208415  | 3.47908   | -2.044112 |
| O | -1.092776 | -2.089426 | -1.553252 |   |           |           |           |

| Conformer <b>1a_2</b> |           |           |           |   |           |           |           |
|-----------------------|-----------|-----------|-----------|---|-----------|-----------|-----------|
| C                     | 3.820279  | -2.168969 | 1.681244  | C | -0.209963 | -1.731348 | -2.676541 |
| C                     | 4.122762  | -2.039706 | 0.195929  | O | 1.457617  | 3.835284  | -1.156868 |
| C                     | 3.0617    | -1.195807 | -0.528184 | H | 4.607445  | -2.767514 | 2.161345  |
| C                     | 2.818644  | 0.199691  | 0.132106  | H | 2.867506  | -2.714835 | 1.801483  |
| C                     | 2.651941  | 0.033026  | 1.635728  | H | 5.105157  | -1.550849 | 0.073665  |
| C                     | 3.700845  | -0.792119 | 2.330137  | H | 2.10193   | -1.736972 | -0.408855 |
| C                     | 1.568585  | 0.770349  | -0.506282 | H | 3.465579  | -0.873756 | 3.399414  |
| C                     | 0.478392  | 1.417653  | 0.246594  | H | 4.674072  | -0.277135 | 2.252756  |
| C                     | 0.647227  | 1.501876  | 1.743597  | H | 1.676038  | 1.108721  | -1.541486 |
| C                     | 1.660311  | 0.610119  | 2.334567  | H | 1.613341  | 0.517306  | 3.421869  |
| O                     | 0.010539  | 2.28241   | 2.41713   | H | -2.478628 | 3.007567  | -0.558723 |
| O                     | 0.362267  | 0.09353   | -0.247693 | H | -1.78741  | 3.070854  | 1.101975  |
| C                     | -0.395282 | 2.458411  | -0.461789 | H | 0.529798  | 4.08137   | 0.636793  |
| C                     | -1.79154  | 2.524781  | 0.150341  | H | -0.446398 | 4.583297  | -0.771501 |
| C                     | 0.277691  | 3.832192  | -0.402816 | H | -1.021084 | 1.34014   | -1.945441 |
| O                     | -0.471703 | 2.137065  | -1.830233 | H | 3.452141  | -2.130845 | -2.432438 |
| C                     | 3.396962  | -1.117078 | -2.016807 | H | 4.38031   | -0.649963 | -2.17539  |
| C                     | 3.959951  | 1.197418  | -0.134732 | H | 2.651339  | -0.547014 | -2.587317 |
| O                     | 4.265344  | -3.304851 | -0.407372 | H | 3.736967  | 2.156454  | 0.353664  |
| O                     | -2.203215 | 1.181868  | 0.382999  | H | 4.927172  | 0.829099  | 0.234473  |
| C                     | -3.501573 | 0.891251  | 0.301666  | H | 4.056959  | 1.39249   | -1.211743 |
| C                     | -3.732049 | -0.589159 | 0.417858  | H | 3.439567  | -3.78711  | -0.276664 |
| O                     | -4.377393 | 1.705562  | 0.223726  | H | -5.321062 | -0.244075 | 1.810941  |
| C                     | -4.729614 | -1.003802 | 1.298066  | H | -5.728781 | -2.675492 | 2.222408  |
| C                     | -4.950673 | -2.361491 | 1.525464  | H | -4.34206  | -4.375487 | 1.043344  |
| C                     | -4.175212 | -3.312331 | 0.866166  | H | -2.601359 | -3.639248 | -0.582146 |
| C                     | -3.194308 | -2.905597 | -0.036528 | H | 0.256758  | -0.756118 | -2.488512 |
| C                     | -2.97358  | -1.547571 | -0.276074 | H | 0.544318  | -2.524357 | -2.691284 |
| C                     | -2.034916 | -1.136084 | -1.364631 | H | -0.749865 | -1.694715 | -3.632622 |
| O                     | -2.150754 | -0.116928 | -2.00374  | H | 1.21045   | 3.501397  | -2.030203 |
| O                     | -1.102663 | -2.046118 | -1.616734 |   |           |           |           |

| Conformer <b>1a_3</b> |          |           |           |   |          |          |          |
|-----------------------|----------|-----------|-----------|---|----------|----------|----------|
| C                     | -4.23733 | -2.292152 | -0.640628 | C | 4.074632 | 1.447555 | 2.375053 |
| C                     | -3.92598 | -2.209531 | 0.848999  | O | -1.28349 | 3.917138 | 0.807963 |

|   |           |           |           |   |           |           |           |
|---|-----------|-----------|-----------|---|-----------|-----------|-----------|
| C | -2.65116  | -1.388793 | 1.095458  | H | -5.163807 | -2.865055 | -0.788559 |
| C | -2.740411 | 0.046307  | 0.484173  | H | -3.42118  | -2.85298  | -1.129942 |
| C | -3.120646 | -0.075407 | -0.983254 | H | -4.770171 | -1.728493 | 1.37277   |
| C | -4.343284 | -0.905199 | -1.272686 | H | -1.845896 | -1.887581 | 0.522425  |
| C | -1.380402 | 0.684872  | 0.670881  | H | -4.497721 | -0.976328 | -2.357531 |
| C | -0.646076 | 1.377832  | -0.40422  | H | -5.227439 | -0.391356 | -0.857935 |
| C | -1.319132 | 1.454343  | -1.755614 | H | -1.160787 | 1.014965  | 1.691086  |
| C | -2.447125 | 0.532105  | -1.97362  | H | -2.779993 | 0.453433  | -3.010797 |
| O | -0.98551  | 2.265767  | -2.590224 | H | 2.3376    | 3.10051   | -0.726134 |
| O | -0.300421 | 0.064903  | 0.020512  | H | 1.309981  | 2.394307  | -2.035705 |
| C | 0.401069  | 2.436633  | -0.051149 | H | -0.591169 | 4.062455  | -1.098552 |
| C | 1.608289  | 2.321212  | -0.983069 | H | 0.586152  | 4.558392  | 0.155259  |
| C | -0.214605 | 3.836964  | -0.094475 | H | 1.106862  | 1.351268  | 1.433433  |
| O | 0.819912  | 2.271689  | 1.284365  | H | -2.967548 | -0.8513   | 3.192623  |
| C | -2.251786 | -1.40772  | 2.569245  | H | -1.246834 | -0.991391 | 2.7231    |
| C | -3.755192 | 0.960535  | 1.193659  | H | -2.248119 | -2.444006 | 2.928066  |
| O | -3.833104 | -3.497725 | 1.411632  | H | -3.696505 | 1.971238  | 0.763503  |
| O | 2.271345  | 1.078118  | -0.740665 | H | -4.786811 | 0.597433  | 1.097684  |
| C | 1.951982  | 0.028141  | -1.513044 | H | -3.522492 | 1.040046  | 2.264822  |
| C | 2.631222  | -1.227451 | -1.061797 | H | -3.105047 | -3.957068 | 0.974907  |
| O | 1.242568  | 0.09483   | -2.477273 | H | 2.229865  | -2.129229 | -2.956734 |
| C | 2.698479  | -2.274765 | -1.982645 | H | 3.406728  | -4.269823 | -2.385281 |
| C | 3.354237  | -3.458533 | -1.658427 | H | 4.470049  | -4.522507 | -0.14637  |
| C | 3.948669  | -3.599949 | -0.405308 | H | 4.329935  | -2.676831 | 1.50997   |
| C | 3.87556   | -2.56402  | 0.524302  | H | 5.044192  | 1.953239  | 2.357956  |
| C | 3.209762  | -1.379999 | 0.206454  | H | 3.270043  | 2.12978   | 2.066553  |
| C | 3.06442   | -0.329962 | 1.26969   | H | 3.853628  | 1.068972  | 3.381769  |
| O | 2.059479  | -0.168381 | 1.917283  | H | -0.937103 | 3.604184  | 1.654711  |
| O | 4.173276  | 0.369364  | 1.448287  |   |           |           |           |

| Conformer 1a_4 |          |           |           |   |           |           |           |
|----------------|----------|-----------|-----------|---|-----------|-----------|-----------|
| C              | 4.236731 | 2.292667  | -0.640771 | C | -4.074409 | -1.448108 | 2.374917  |
| C              | 3.926052 | 2.209587  | 0.84897   | O | 1.283696  | -3.917074 | 0.807576  |
| C              | 2.651519 | 1.388515  | 1.09582   | H | 5.162951  | 2.86592   | -0.788943 |
| C              | 2.740616 | -0.046364 | 0.483991  | H | 3.420195  | 2.853313  | -1.129641 |
| C              | 3.120476 | 0.075787  | -0.983516 | H | 4.770592  | 1.728573  | 1.372202  |
| C              | 4.3429   | 0.905852  | -1.273062 | H | 1.845851  | 1.887385  | 0.52342   |
| C              | 1.380633 | -0.684979 | 0.670802  | H | 4.497145  | 0.977149  | -2.357921 |
| C              | 0.646136 | -1.37774  | -0.404321 | H | 5.227222  | 0.392133  | -0.858507 |
| C              | 1.319072 | -1.454112 | -1.755771 | H | 1.16116   | -1.015281 | 1.690966  |
| C              | 2.446837 | -0.531619 | -1.973866 | H | 2.779487  | -0.452677 | -3.011091 |
| O              | 0.98554  | -2.265607 | -2.590351 | H | -2.337541 | -3.100392 | -0.726332 |

|   |           |           |           |   |           |           |           |
|---|-----------|-----------|-----------|---|-----------|-----------|-----------|
| O | 0.300574  | -0.064887 | 0.02068   | H | -1.309938 | -2.394034 | -2.035838 |
| C | -0.400995 | -2.436567 | -0.051289 | H | 0.591063  | -4.062405 | -1.09882  |
| C | -1.608235 | -2.321067 | -0.983191 | H | -0.586049 | -4.558327 | 0.155171  |
| C | 0.21467   | -3.836897 | -0.094682 | H | -1.106922 | -1.351302 | 1.433306  |
| O | -0.819858 | -2.271692 | 1.284226  | H | 1.248462  | 0.989925  | 2.724303  |
| C | 2.253068  | 1.406869  | 2.569861  | H | 2.249054  | 2.443049  | 2.928976  |
| C | 3.755586  | -0.960812 | 1.19291   | H | 2.969573  | 0.850705  | 3.192612  |
| O | 3.833145  | 3.497599  | 1.412016  | H | 3.697033  | -1.971307 | 0.762259  |
| O | -2.271308 | -1.078004 | -0.740639 | H | 4.787132  | -0.597465 | 1.097055  |
| C | -1.951997 | -0.027924 | -1.512887 | H | 3.522973  | -1.040918 | 2.264048  |
| C | -2.631431 | 1.227539  | -1.061579 | H | 3.104219  | 3.956587  | 0.97636   |
| O | -1.242391 | -0.094425 | -2.476995 | H | -2.230026 | 2.129564  | -2.956404 |
| C | -2.698744 | 2.274925  | -1.98234  | H | -3.407238 | 4.269922  | -2.384862 |
| C | -3.35469  | 3.458582  | -1.658069 | H | -4.470776 | 4.52226   | -0.146007 |
| C | -3.949251 | 3.5998    | -0.404995 | H | -4.330577 | 2.676462  | 1.510161  |
| C | -3.876093 | 2.563789  | 0.524526  | H | -5.043947 | -1.95383  | 2.357978  |
| C | -3.210112 | 1.379893  | 0.206638  | H | -3.853148 | -1.069636 | 3.381616  |
| C | -3.064593 | 0.329729  | 1.26973   | H | -3.26984  | -2.130229 | 2.066135  |
| O | -2.059581 | 0.16825   | 1.917244  | H | 0.937448  | -3.604169 | 1.654399  |
| O | -4.17332  | -0.369789 | 1.448298  |   |           |           |           |

| Conformer <b>1a_5</b> |           |           |           |   |           |           |           |
|-----------------------|-----------|-----------|-----------|---|-----------|-----------|-----------|
| C                     | -4.23545  | -2.273248 | -0.649264 | C | 4.094781  | 1.421301  | 2.369255  |
| C                     | -3.950828 | -2.167586 | 0.843825  | O | -1.26174  | 3.915517  | 0.816606  |
| C                     | -2.667083 | -1.373722 | 1.094699  | H | -5.170478 | -2.832433 | -0.817672 |
| C                     | -2.734453 | 0.057835  | 0.473225  | H | -3.416875 | -2.85361  | -1.103723 |
| C                     | -3.103304 | -0.066148 | -0.997079 | H | -4.794144 | -1.64275  | 1.340027  |
| C                     | -4.325898 | -0.892651 | -1.296692 | H | -1.871136 | -1.897896 | 0.536884  |
| C                     | -1.368779 | 0.682424  | 0.665959  | H | -4.464251 | -0.973835 | -2.382978 |
| C                     | -0.628679 | 1.37813   | -0.403589 | H | -5.212798 | -0.368218 | -0.900754 |
| C                     | -1.296295 | 1.462092  | -1.756915 | H | -1.150607 | 1.008301  | 1.687736  |
| C                     | -2.422891 | 0.540285  | -1.983261 | H | -2.748151 | 0.461094  | -3.022796 |
| O                     | -0.960046 | 2.277712  | -2.586511 | H | 2.362692  | 3.090442  | -0.707666 |
| O                     | -0.289819 | 0.06184   | 0.016224  | H | 1.335692  | 2.396755  | -2.024456 |
| C                     | 0.420539  | 2.432317  | -0.042847 | H | -0.563382 | 4.064978  | -1.087625 |
| C                     | 1.630347  | 2.316187  | -0.971305 | H | 0.611794  | 4.552707  | 0.171565  |
| C                     | -0.190513 | 3.834763  | -0.083275 | H | 1.117878  | 1.340147  | 1.44121   |
| O                     | 0.834246  | 2.261911  | 1.293526  | H | -2.251569 | -2.43143  | 2.917553  |
| C                     | -2.28369  | -1.391428 | 2.572822  | H | -3.019025 | -0.856702 | 3.193187  |
| C                     | -3.739739 | 0.994242  | 1.168185  | H | -1.291299 | -0.950203 | 2.737879  |
| O                     | -3.774529 | -3.445339 | 1.412028  | H | -3.643454 | 2.006715  | 0.748892  |
| O                     | 2.285553  | 1.068349  | -0.733395 | H | -4.778771 | 0.661319  | 1.046261  |

|   |          |           |           |   |           |           |           |
|---|----------|-----------|-----------|---|-----------|-----------|-----------|
| C | 1.962784 | 0.02429   | -1.51301  | H | -3.528222 | 1.057025  | 2.244992  |
| C | 2.625077 | -1.239845 | -1.061468 | H | -4.572358 | -3.960947 | 1.254883  |
| O | 1.261348 | 0.102524  | -2.482242 | H | 2.21493   | -2.135383 | -2.957399 |
| C | 2.679238 | -2.287862 | -1.982354 | H | 3.356379  | -4.294041 | -2.38261  |
| C | 3.315186 | -3.481736 | -1.656203 | H | 4.40693   | -4.564118 | -0.139756 |
| C | 3.902384 | -3.632874 | -0.400877 | H | 4.289903  | -2.71709  | 1.516501  |
| C | 3.84219  | -2.596223 | 0.528755  | H | 5.06708   | 1.921497  | 2.345174  |
| C | 3.196836 | -1.401583 | 0.208694  | H | 3.291984  | 2.107655  | 2.065131  |
| C | 3.065604 | -0.349758 | 1.271947  | H | 3.878031  | 1.045854  | 3.378099  |
| O | 2.066122 | -0.179316 | 1.925447  | H | -0.919696 | 3.593492  | 1.661797  |
| O | 4.181205 | 0.341236  | 1.443856  |   |           |           |           |

| Conformer <b>2_1</b> |           |           |           |   |           |           |           |
|----------------------|-----------|-----------|-----------|---|-----------|-----------|-----------|
| O                    | 0.852007  | -2.795104 | -1.238511 | C | 3.868586  | -1.091705 | -0.393751 |
| C                    | 1.559303  | -1.876972 | -0.879395 | C | 3.021285  | -1.917002 | -1.031824 |
| C                    | 0.982271  | -0.640265 | -0.234222 | H | -0.374286 | -2.684259 | 0.962963  |
| C                    | -0.480714 | -0.655608 | 0.213174  | H | -1.77047  | -1.727766 | 1.540324  |
| C                    | -0.689013 | -1.693638 | 1.316238  | H | -0.167474 | -0.463734 | 2.682705  |
| O                    | 0.072966  | -1.369869 | 2.447713  | H | -0.836841 | 1.258444  | 0.118596  |
| O                    | -0.796168 | 0.580458  | 0.811044  | H | -1.086256 | -0.250371 | -1.826994 |
| C                    | -1.386695 | -0.909474 | -0.999151 | H | -1.316393 | -1.955022 | -1.313613 |
| O                    | -2.750175 | -0.668122 | -0.668872 | H | -4.631901 | 2.811236  | -0.851328 |
| C                    | -3.207189 | 0.583088  | -0.798821 | H | -7.063695 | 3.088313  | -0.26855  |
| C                    | -4.651338 | 0.704451  | -0.444507 | H | -8.395045 | 1.102061  | 0.456918  |
| C                    | -5.240593 | 1.966077  | -0.531074 | H | -6.996678 | -2.097245 | 0.701176  |
| C                    | -6.588812 | 2.108342  | -0.206175 | H | -4.915121 | -1.386158 | 0.019273  |
| C                    | -7.339674 | 1.009923  | 0.198805  | H | 1.493778  | 0.883752  | 1.230884  |
| C                    | -6.743644 | -0.254322 | 0.283431  | H | 3.080375  | -1.307245 | 2.218318  |
| O                    | -7.518618 | -1.287521 | 0.681424  | H | 4.731188  | -0.622153 | 2.180902  |
| C                    | -5.39537  | -0.407821 | -0.039698 | H | 3.353308  | 0.38026   | 2.686701  |
| O                    | -2.526507 | 1.506013  | -1.171404 | H | 3.771749  | 1.582583  | -0.875393 |
| C                    | 1.922095  | 0.278689  | 0.427281  | H | 4.320564  | 3.4229    | 0.688881  |
| O                    | 1.397093  | 0.574372  | -0.846025 | H | 4.156664  | 2.348515  | 2.081449  |
| C                    | 3.411452  | 0.02259   | 0.534578  | H | 2.729096  | 2.7366    | 1.082069  |
| C                    | 3.671052  | -0.408252 | 1.990462  | H | 6.072401  | 0.933127  | 1.017202  |
| C                    | 4.140405  | 1.34725   | 0.141858  | H | 5.971112  | 2.625145  | -1.225182 |
| C                    | 3.806486  | 2.525791  | 1.053753  | H | 7.110429  | -0.04785  | -0.999474 |
| C                    | 5.662856  | 1.17648   | 0.021292  | H | 5.666901  | 0.3466    | -1.956145 |
| O                    | 6.290093  | 2.382071  | -0.347166 | H | 5.575409  | -2.0533   | -1.26464  |
| C                    | 6.017526  | 0.058075  | -0.949278 | H | 5.77663   | -1.580338 | 0.427329  |
| C                    | 5.357096  | -1.257087 | -0.540833 | H | 3.394806  | -2.734142 | -1.652858 |

| Conformer 2_2 |           |           |           |   |           |           |           |
|---------------|-----------|-----------|-----------|---|-----------|-----------|-----------|
| O             | 1.069423  | -2.910431 | -1.186459 | C | 3.942784  | -0.947313 | -0.407844 |
| C             | 1.701176  | -1.931839 | -0.847314 | C | 3.158953  | -1.84892  | -1.02338  |
| C             | 1.03099   | -0.742237 | -0.203552 | H | -0.123611 | -2.876962 | 1.045789  |
| C             | -0.417499 | -0.877298 | 0.26988   | H | -1.587324 | -2.036465 | 1.63515   |
| C             | -0.517027 | -1.911917 | 1.39108   | H | -0.083937 | -0.622575 | 2.733552  |
| O             | 0.233555  | -1.505946 | 2.5038    | H | -0.924815 | 0.999886  | 0.15331   |
| O             | -0.828455 | 0.337059  | 0.854731  | H | -1.088621 | -0.561428 | -1.766327 |
| C             | -1.319807 | -1.226776 | -0.921403 | H | -1.171249 | -2.268893 | -1.218714 |
| O             | -2.692104 | -1.090934 | -0.569036 | H | -4.804057 | -1.96401  | 0.202168  |
| C             | -3.253081 | 0.11301   | -0.711931 | H | -7.226867 | -1.826465 | 0.818469  |
| C             | -4.69519  | 0.121784  | -0.328949 | H | -8.441518 | 0.346046  | 0.61855   |
| C             | -5.349597 | -1.025254 | 0.122446  | H | -6.873124 | 3.266118  | -0.511713 |
| C             | -6.699766 | -0.939944 | 0.463427  | H | -4.827942 | 2.212707  | -0.800161 |
| C             | -7.386375 | 0.264409  | 0.355955  | H | 1.434137  | 0.834721  | 1.2387    |
| C             | -6.723839 | 1.4116    | -0.099165 | H | 4.805799  | -0.370259 | 2.145747  |
| O             | -7.436998 | 2.555978  | -0.185521 | H | 3.354248  | 0.514902  | 2.664268  |
| C             | -5.374988 | 1.337505  | -0.441801 | H | 3.221947  | -1.196021 | 2.221022  |
| O             | -2.660673 | 1.083447  | -1.116678 | H | 3.607264  | 1.700652  | -0.919201 |
| C             | 1.899468  | 0.260485  | 0.433056  | H | 2.50085   | 2.790331  | 1.03759   |
| O             | 1.329776  | 0.497137  | -0.833647 | H | 3.968105  | 2.535068  | 2.02214   |
| C             | 3.406962  | 0.134934  | 0.516106  | H | 4.024505  | 3.602075  | 0.615193  |
| C             | 3.727968  | -0.252168 | 1.971886  | H | 5.986349  | 1.278532  | 0.940505  |
| C             | 4.01154   | 1.512198  | 0.094262  | H | 5.703946  | 2.923495  | -1.321131 |
| C             | 3.591693  | 2.669897  | 0.997262  | H | 7.072293  | 0.363256  | -1.081672 |
| C             | 5.540978  | 1.471995  | -0.050905 | H | 5.584701  | 0.618787  | -2.017924 |
| O             | 6.055399  | 2.722119  | -0.444964 | H | 5.711588  | -1.770273 | -1.296841 |
| C             | 5.975276  | 0.375238  | -1.01385  | H | 5.899086  | -1.259806 | 0.385756  |
| C             | 5.437398  | -0.986457 | -0.578541 | H | 3.590762  | -2.638427 | -1.642381 |

| Conformer 2_3 |           |           |           |   |           |           |           |
|---------------|-----------|-----------|-----------|---|-----------|-----------|-----------|
| O             | 1.066391  | -2.925277 | -1.157341 | C | 3.939088  | -0.9483   | -0.41535  |
| C             | 1.697671  | -1.940802 | -0.834311 | C | 3.154069  | -1.856128 | -1.01996  |
| C             | 1.029305  | -0.744098 | -0.202652 | H | -0.128069 | -2.864562 | 1.069669  |
| C             | -0.418904 | -0.872712 | 0.273277  | H | -1.590407 | -2.015598 | 1.650633  |
| C             | -0.519919 | -1.895452 | 1.405083  | H | -0.081606 | -0.590846 | 2.73076   |
| O             | 0.231278  | -1.479095 | 2.513678  | H | -0.917591 | 1.00548   | 0.138293  |
| O             | -0.828707 | 0.347952  | 0.845729  | H | -1.091248 | -0.575089 | -1.765035 |
| C             | -1.321884 | -1.23304  | -0.914193 | H | -1.173251 | -2.277793 | -1.202148 |

|   |           |           |           |   |           |           |           |
|---|-----------|-----------|-----------|---|-----------|-----------|-----------|
| O | -2.693928 | -1.094267 | -0.561863 | H | -4.80432  | -1.95995  | 0.221994  |
| C | -3.255288 | 0.10822   | -0.715821 | H | -7.2259   | -1.816452 | 0.8422    |
| C | -4.696624 | 0.12058   | -0.329246 | H | -8.440926 | 0.354149  | 0.624252  |
| C | -5.350092 | -1.022011 | 0.13457   | H | -6.874267 | 3.263196  | -0.536806 |
| C | -6.699517 | -0.933374 | 0.477621  | H | -4.830235 | 2.20676   | -0.820229 |
| C | -7.386352 | 0.269956  | 0.360173  | H | 1.43533   | 0.84833   | 1.220802  |
| C | -6.724705 | 1.412661  | -0.107244 | H | 4.794     | -0.394483 | 2.139091  |
| O | -7.437845 | 2.556402  | -0.202882 | H | 3.362184  | 0.524807  | 2.653519  |
| C | -5.376627 | 1.335159  | -0.452191 | H | 3.192562  | -1.185064 | 2.216638  |
| O | -2.664621 | 1.074468  | -1.13232  | H | 3.622148  | 1.71363   | -0.925407 |
| C | 1.899641  | 0.265781  | 0.420656  | H | 2.510575  | 2.770323  | 1.067348  |
| O | 1.328052  | 0.48766   | -0.846956 | H | 4.011765  | 2.554625  | 2.008187  |
| C | 3.40679   | 0.137035  | 0.507223  | H | 4.001088  | 3.605569  | 0.581184  |
| C | 3.719075  | -0.253285 | 1.964353  | H | 5.973077  | 1.241221  | 0.94484   |
| C | 4.014001  | 1.513308  | 0.087545  | H | 6.914629  | 2.729027  | -0.576754 |
| C | 3.601841  | 2.671857  | 0.993576  | H | 7.063229  | 0.349353  | -1.108457 |
| C | 5.537416  | 1.462969  | -0.052295 | H | 5.569211  | 0.64292   | -2.024316 |
| O | 5.955398  | 2.734048  | -0.493111 | H | 5.702036  | -1.767475 | -1.319462 |
| C | 5.964153  | 0.377484  | -1.030851 | H | 5.899757  | -1.264297 | 0.364439  |
| C | 5.432568  | -0.986583 | -0.596253 | H | 3.583848  | -2.648274 | -1.636976 |

| Conformer 2_4 |           |           |           |   |           |           |           |
|---------------|-----------|-----------|-----------|---|-----------|-----------|-----------|
| O             | 0.848425  | -2.81153  | -1.206752 | C | 3.865183  | -1.091799 | -0.400157 |
| C             | 1.555494  | -1.886371 | -0.8653   | C | 3.01646   | -1.924099 | -1.026971 |
| C             | 0.980427  | -0.641792 | -0.234344 | H | -0.379337 | -2.669751 | 0.988256  |
| C             | -0.482208 | -0.650265 | 0.21429   | H | -1.773728 | -1.703735 | 1.554429  |
| C             | -0.692229 | -1.674469 | 1.329761  | H | -0.164701 | -0.427234 | 2.677899  |
| O             | 0.070305  | -1.338454 | 2.457389  | H | -0.828076 | 1.264321  | 0.097716  |
| O             | -0.796524 | 0.59319   | 0.797305  | H | -1.089125 | -0.266739 | -1.829512 |
| C             | -1.388776 | -0.917355 | -0.994705 | H | -1.318225 | -1.966194 | -1.298041 |
| O             | -2.752051 | -0.673176 | -0.665771 | H | -4.636612 | 2.802391  | -0.884848 |
| C             | -3.209822 | 0.576338  | -0.809305 | H | -7.066861 | 3.084883  | -0.297732 |
| C             | -4.653095 | 0.700936  | -0.451725 | H | -8.394306 | 1.10673   | 0.456687  |
| C             | -5.243689 | 1.960896  | -0.552078 | H | -6.992025 | -2.088076 | 0.736125  |
| C             | -6.590974 | 2.10613   | -0.224649 | H | -4.913565 | -1.383846 | 0.03885   |
| C             | -7.339679 | 1.012239  | 0.196386  | H | 1.495124  | 0.899093  | 1.210817  |
| C             | -6.742272 | -0.250303 | 0.294819  | H | 4.715719  | -0.641955 | 2.175811  |
| O             | -7.51503  | -1.279294 | 0.708169  | H | 3.358045  | 0.39035   | 2.676542  |
| C             | -5.394915 | -0.406728 | -0.03072  | H | 3.051572  | -1.293464 | 2.213492  |
| O             | -2.531379 | 1.49508   | -1.195296 | H | 3.789141  | 1.595279  | -0.880665 |
| C             | 1.922438  | 0.284972  | 0.413672  | H | 2.736467  | 2.718028  | 1.109796  |



|   |          |           |           |   |          |           |           |
|---|----------|-----------|-----------|---|----------|-----------|-----------|
| O | 1.395421 | 0.564666  | -0.861476 | H | 4.198923 | 2.364494  | 2.069765  |
| C | 3.411031 | 0.025729  | 0.526045  | H | 4.299975 | 3.429023  | 0.656644  |
| C | 3.660348 | -0.407157 | 1.983466  | H | 6.054799 | 0.896483  | 1.023634  |
| C | 4.143156 | 1.349046  | 0.136109  | H | 7.150396 | 2.316578  | -0.457692 |
| C | 3.816429 | 2.527875  | 1.050839  | H | 7.101385 | -0.060164 | -1.023493 |
| C | 5.658679 | 1.168024  | 0.022267  | H | 5.654927 | 0.372831  | -1.960156 |
| O | 6.193634 | 2.403354  | -0.392849 | H | 5.567188 | -2.048841 | -1.285338 |
| C | 6.007627 | 0.062015  | -0.963971 | H | 5.777146 | -1.584097 | 0.408113  |
| C | 5.352918 | -1.256004 | -0.556679 | H | 3.388166 | -2.744216 | -1.645151 |

| Conformer 2_5 |           |           |           |   |           |           |           |
|---------------|-----------|-----------|-----------|---|-----------|-----------|-----------|
| O             | 0.861303  | -2.798055 | -1.242474 | C | 3.873071  | -1.089881 | -0.390263 |
| C             | 1.565834  | -1.879009 | -0.880899 | C | 3.028514  | -1.916661 | -1.029861 |
| C             | 0.985262  | -0.643636 | -0.236414 | H | -0.365378 | -2.688326 | 0.965233  |
| C             | -0.477935 | -0.662081 | 0.210175  | H | -1.764669 | -1.735834 | 1.539986  |
| C             | -0.683541 | -1.697858 | 1.315893  | H | -0.16963  | -0.464382 | 2.682009  |
| O             | 0.077874  | -1.368414 | 2.446588  | H | -0.836852 | 1.250697  | 0.109144  |
| O             | -0.796417 | 0.575351  | 0.804113  | H | -1.083874 | -0.2665   | -1.832167 |
| C             | -1.383814 | -0.921801 | -1.001081 | H | -1.314085 | -1.968828 | -1.310553 |
| O             | -2.74686  | -0.679296 | -0.670783 | H | -4.62492  | 2.79992   | -0.870615 |
| C             | -3.204655 | 0.569139  | -0.805248 | H | -7.054084 | 3.087001  | -0.284772 |
| C             | -4.649266 | 0.692516  | -0.448383 | H | -8.387123 | 1.130197  | 0.453077  |
| C             | -5.235633 | 1.959073  | -0.543198 | H | -8.335187 | -1.116946 | 0.881143  |
| C             | -6.578866 | 2.107573  | -0.217512 | H | -4.934885 | -1.400294 | 0.036594  |
| C             | -7.331177 | 1.008858  | 0.197728  | H | 1.491256  | 0.881416  | 1.228974  |
| C             | -6.73959  | -0.254632 | 0.289921  | H | 4.730139  | -0.616579 | 2.185483  |
| O             | -7.421653 | -1.352211 | 0.685859  | H | 3.349833  | 0.384328  | 2.687919  |
| C             | -5.390177 | -0.41376  | -0.035868 | H | 3.080117  | -1.303933 | 2.221009  |
| O             | -2.526896 | 1.492532  | -1.183271 | H | 3.771593  | 1.583049  | -0.874992 |
| C             | 1.922283  | 0.277163  | 0.426247  | H | 2.722612  | 2.737097  | 1.078744  |
| O             | 1.398892  | 0.571734  | -0.848045 | H | 4.149065  | 2.35382   | 2.08151   |
| C             | 3.411992  | 0.024273  | 0.536283  | H | 4.313287  | 3.426809  | 0.687836  |
| C             | 3.669988  | -0.404443 | 1.993071  | H | 6.070106  | 0.941067  | 1.02279   |
| C             | 4.138898  | 1.349906  | 0.143257  | H | 5.968634  | 2.63017   | -1.22172  |
| C             | 3.800581  | 2.528959  | 1.052866  | H | 7.114115  | -0.040278 | -0.990585 |
| C             | 5.661905  | 1.18224   | 0.025798  | H | 5.671585  | 0.349964  | -1.950562 |
| O             | 6.287383  | 2.388728  | -0.343173 | H | 5.58355   | -2.049233 | -1.256489 |
| C             | 6.020869  | 0.063362  | -0.942669 | H | 5.780516  | -1.573919 | 0.435345  |
| C             | 5.362228  | -1.252638 | -0.534009 | H | 3.404633  | -2.733418 | -1.649857 |

| Conformer 2_6 |           |           |           |   |           |           |           |
|---------------|-----------|-----------|-----------|---|-----------|-----------|-----------|
| O             | 0.857803  | -2.814772 | -1.210462 | C | 3.869632  | -1.089693 | -0.397002 |
| C             | 1.562061  | -1.888487 | -0.866905 | C | 3.023728  | -1.923619 | -1.025272 |
| C             | 0.983388  | -0.645158 | -0.236893 | H | -0.369888 | -2.673543 | 0.99096   |
| C             | -0.479443 | -0.656829 | 0.210932  | H | -1.767634 | -1.711725 | 1.554197  |
| C             | -0.686471 | -1.678384 | 1.329456  | H | -0.166988 | -0.426992 | 2.676868  |
| O             | 0.075406  | -1.336144 | 2.456166  | H | -0.828296 | 1.256359  | 0.087096  |
| O             | -0.797032 | 0.588171  | 0.789449  | H | -1.086866 | -0.284027 | -1.835087 |
| C             | -1.385903 | -0.930456 | -0.996767 | H | -1.315754 | -1.98084  | -1.294631 |
| O             | -2.748771 | -0.68512  | -0.667823 | H | -4.630057 | 2.789583  | -0.907996 |
| C             | -3.20746  | 0.561455  | -0.816473 | H | -7.057511 | 3.08296   | -0.317652 |
| C             | -4.651117 | 0.688432  | -0.456081 | H | -8.386185 | 1.135584  | 0.452598  |
| C             | -5.238985 | 1.953002  | -0.566581 | H | -8.330699 | -1.104781 | 0.912182  |
| C             | -6.581181 | 2.104974  | -0.238241 | H | -4.933053 | -1.397496 | 0.059339  |
| C             | -7.331039 | 1.011589  | 0.195179  | H | 1.492419  | 0.897205  | 1.208205  |
| C             | -6.73793  | -0.249906 | 0.303075  | H | 3.05019   | -1.290219 | 2.21555   |
| O             | -7.417718 | -1.342358 | 0.717182  | H | 4.713888  | -0.637078 | 2.180314  |
| C             | -5.389583 | -0.41251  | -0.025361 | H | 3.35402   | 0.394171  | 2.677568  |
| O             | -2.532002 | 1.480303  | -1.20867  | H | 3.789108  | 1.596531  | -0.879781 |
| C             | 1.922507  | 0.283668  | 0.41214   | H | 2.730008  | 2.718245  | 1.107798  |
| O             | 1.397174  | 0.561901  | -0.864105 | H | 4.191642  | 2.369337  | 2.070645  |
| C             | 3.411392  | 0.027573  | 0.52752   | H | 4.292593  | 3.432881  | 0.656723  |
| C             | 3.658604  | -0.403609 | 1.985793  | H | 6.052185  | 0.903619  | 1.029835  |
| C             | 4.141646  | 1.351938  | 0.137904  | H | 7.148459  | 2.323814  | -0.451725 |
| C             | 3.810568  | 2.530891  | 1.050889  | H | 7.105166  | -0.052169 | -1.014427 |
| C             | 5.657747  | 1.173819  | 0.027434  | H | 5.659669  | 0.377028  | -1.954404 |
| O             | 6.191619  | 2.409897  | -0.387206 | H | 5.57539   | -2.044242 | -1.277715 |
| C             | 6.011002  | 0.06778   | -0.957238 | H | 5.78099   | -1.577551 | 0.415757  |
| C             | 5.358046  | -1.251196 | -0.550186 | H | 3.398111  | -2.743331 | -1.642393 |

| Conformer 2_7 |           |           |           |   |           |           |           |
|---------------|-----------|-----------|-----------|---|-----------|-----------|-----------|
| O             | 1.066907  | -2.928581 | -1.142664 | C | 3.941702  | -0.951448 | -0.409637 |
| C             | 1.698994  | -1.942942 | -0.824642 | C | 3.155693  | -1.861254 | -1.009945 |
| C             | 1.031913  | -0.741803 | -0.20019  | H | -0.129987 | -2.854747 | 1.079698  |
| C             | -0.416973 | -0.865196 | 0.275307  | H | -1.592174 | -2.001242 | 1.654811  |
| C             | -0.52106  | -1.883794 | 1.410611  | H | -0.081076 | -0.572816 | 2.728991  |
| O             | 0.228679  | -1.463919 | 2.518958  | H | -0.918941 | 1.012716  | 0.134828  |
| O             | -0.824074 | 0.357897  | 0.844119  | H | -1.087792 | -0.571852 | -1.763789 |
| C             | -1.319681 | -1.227676 | -0.911627 | H | -1.171059 | -2.273242 | -1.196812 |
| O             | -2.691853 | -1.087356 | -0.561099 | H | -4.795303 | -1.95702  | 0.212096  |
| C             | -3.251704 | 0.116655  | -0.718979 | H | -7.217197 | -1.825202 | 0.828893  |

|   |           |           |           |   |           |           |           |
|---|-----------|-----------|-----------|---|-----------|-----------|-----------|
| C | -4.695184 | 0.128668  | -0.335441 | H | -8.440365 | 0.320196  | 0.619421  |
| C | -5.345207 | -1.021498 | 0.126133  | H | -8.270615 | 2.521696  | 0.019636  |
| C | -6.691576 | -0.940724 | 0.466787  | H | -4.854738 | 2.225291  | -0.819647 |
| C | -7.382441 | 0.264793  | 0.349759  | H | 1.439303  | 0.85807   | 1.214494  |
| C | -6.726561 | 1.410087  | -0.113379 | H | 3.192188  | -1.173622 | 2.222757  |
| O | -7.348225 | 2.602487  | -0.246225 | H | 4.795163  | -0.386318 | 2.142764  |
| C | -5.375318 | 1.33887   | -0.457356 | H | 3.3645    | 0.538153  | 2.651159  |
| O | -2.658292 | 1.080178  | -1.134898 | H | 3.629532  | 1.708432  | -0.933411 |
| C | 1.90348   | 0.270209  | 0.418164  | H | 2.517907  | 2.777095  | 1.052798  |
| O | 1.333631  | 0.48566   | -0.85108  | H | 4.017975  | 2.563844  | 1.996123  |
| C | 3.410349  | 0.139419  | 0.506918  | H | 4.010062  | 3.607382  | 0.563666  |
| C | 3.720643  | -0.244067 | 1.966297  | H | 5.977917  | 1.241175  | 0.94139   |
| C | 4.02017   | 1.512595  | 0.08088   | H | 6.923646  | 2.719675  | -0.586996 |
| C | 3.609052  | 2.676438  | 0.980571  | H | 7.068517  | 0.337847  | -1.106776 |
| C | 5.543608  | 1.458969  | -0.05724  | H | 5.575657  | 0.629391  | -2.025242 |
| O | 5.964413  | 2.727144  | -0.503688 | H | 5.703894  | -1.777763 | -1.30871  |
| C | 5.969405  | 0.368111  | -1.030199 | H | 5.901414  | -1.266803 | 0.372891  |
| C | 5.435266  | -0.992946 | -0.589428 | H | 3.584665  | -2.65722  | -1.622608 |

| Conformer 3_1 |           |           |           |   |           |           |           |
|---------------|-----------|-----------|-----------|---|-----------|-----------|-----------|
| C             | -2.673459 | 3.308165  | 1.029953  | O | 5.533303  | 3.18304   | 0.388325  |
| C             | -3.049825 | 3.031357  | -0.419329 | O | -2.557989 | -3.577603 | -0.373049 |
| C             | -2.30635  | 1.801754  | -0.963801 | H | -3.234155 | 4.18189   | 1.391275  |
| C             | -2.511182 | 0.527242  | -0.083731 | H | -1.599872 | 3.56504   | 1.067904  |
| C             | -2.222549 | 0.874325  | 1.369202  | H | -4.136313 | 2.845223  | -0.479801 |
| C             | -2.932838 | 2.08641   | 1.908831  | H | -1.225875 | 2.030218  | -0.882533 |
| C             | -1.569362 | -0.536089 | -0.611366 | H | -2.624281 | 2.269932  | 2.946517  |
| C             | -0.714682 | -1.365822 | 0.252905  | H | -4.017814 | 1.885516  | 1.927661  |
| C             | -0.74905  | -1.096133 | 1.736676  | H | -1.860561 | -1.000204 | -1.557637 |
| C             | -1.412903 | 0.147706  | 2.158373  | H | -1.272557 | 0.409599  | 3.209514  |
| O             | -0.270468 | -1.872264 | 2.536382  | H | 1.565726  | -3.82602  | -0.391646 |
| O             | -0.189097 | -0.285144 | -0.505888 | H | 1.020615  | -3.552111 | 1.308741  |
| C             | -0.298699 | -2.759315 | -0.222727 | H | -1.464458 | -3.728271 | 1.334324  |
| C             | 1.096928  | -3.117654 | 0.307424  | H | -0.917683 | -4.800515 | 0.013667  |
| C             | -1.323204 | -3.797295 | 0.247848  | H | 0.462272  | -2.407334 | -1.975551 |
| O             | -0.349201 | -2.818443 | -1.628609 | H | -3.705873 | 1.361358  | -2.579638 |
| C             | -2.638643 | 1.588405  | -2.43901  | H | -2.04607  | 0.778345  | -2.884496 |
| C             | -3.931596 | -0.059331 | -0.181873 | H | -2.429535 | 2.510306  | -2.994612 |
| O             | -2.827996 | 4.166359  | -1.223166 | H | -3.993244 | -0.976997 | 0.420574  |
| O             | 1.933129  | -1.975313 | 0.47813   | H | -4.700118 | 0.644807  | 0.164382  |
| C             | 2.411379  | -1.376193 | -0.613959 | H | -4.163515 | -0.332169 | -1.2207   |

|   |          |           |           |   |           |           |           |
|---|----------|-----------|-----------|---|-----------|-----------|-----------|
| C | 3.235874 | -0.187068 | -0.299367 | H | -1.883778 | 4.365334  | -1.197963 |
| O | 2.189579 | -1.771956 | -1.736612 | H | 3.656986  | 0.156413  | -2.375951 |
| C | 3.821886 | 0.515972  | -1.359456 | H | 5.058404  | 2.204438  | -1.925163 |
| C | 4.590928 | 1.642491  | -1.116787 | H | 4.33869   | 1.735704  | 2.288413  |
| C | 4.779202 | 2.082523  | 0.200607  | H | 2.958696  | -0.290304 | 1.834695  |
| C | 4.191319 | 1.386051  | 1.263699  | H | 5.595273  | 3.381625  | 1.329422  |
| C | 3.423236 | 0.255492  | 1.013308  | H | -2.369501 | -3.519188 | -1.320033 |

| Conformer 3_2 |           |           |           |   |           |           |           |
|---------------|-----------|-----------|-----------|---|-----------|-----------|-----------|
| C             | -2.727142 | 3.277302  | 1.024645  | O | 5.546093  | 3.222035  | 0.380061  |
| C             | -3.123322 | 2.9788    | -0.414738 | O | -2.514562 | -3.596027 | -0.373133 |
| C             | -2.350245 | 1.77729   | -0.963555 | H | -3.302461 | 4.13741   | 1.404416  |
| C             | -2.520336 | 0.501078  | -0.079326 | H | -1.663019 | 3.562066  | 1.030551  |
| C             | -2.230505 | 0.854498  | 1.371966  | H | -4.207771 | 2.741786  | -0.448119 |
| C             | -2.954433 | 2.057386  | 1.914401  | H | -1.281075 | 2.045317  | -0.893487 |
| C             | -1.558225 | -0.542596 | -0.609735 | H | -2.635029 | 2.252275  | 2.946695  |
| C             | -0.695794 | -1.364857 | 0.254252  | H | -4.035224 | 1.835781  | 1.949563  |
| C             | -0.73464  | -1.09851  | 1.738238  | H | -1.841309 | -1.008811 | -1.557339 |
| C             | -1.410916 | 0.138411  | 2.160368  | H | -1.270483 | 0.403442  | 3.210706  |
| O             | -0.249715 | -1.871021 | 2.537803  | H | 1.610463  | -3.8009   | -0.392654 |
| O             | -0.182002 | -0.275939 | -0.500476 | H | 1.063451  | -3.531934 | 1.307958  |
| C             | -0.264142 | -2.752938 | -0.223038 | H | -1.418081 | -3.73724  | 1.333334  |
| C             | 1.13526   | -3.096869 | 0.306537  | H | -0.860509 | -4.801152 | 0.010301  |
| C             | -1.276825 | -3.802854 | 0.246675  | H | 0.491719  | -2.390269 | -1.975758 |
| O             | -0.314514 | -2.811894 | -1.628916 | H | -3.75904  | 1.341344  | -2.575276 |
| C             | -2.688606 | 1.556456  | -2.436565 | H | -2.107479 | 0.734006  | -2.874267 |
| C             | -3.925291 | -0.124139 | -0.167629 | H | -2.459688 | 2.471061  | -2.995529 |
| O             | -2.839907 | 4.074272  | -1.254371 | H | -3.950857 | -1.056354 | 0.414904  |
| O             | 1.960682  | -1.946872 | 0.476591  | H | -4.70823  | 0.549339  | 0.206114  |
| C             | 2.434402  | -1.345035 | -0.61633  | H | -4.165445 | -0.380291 | -1.208982 |
| C             | 3.255444  | -0.153427 | -0.303303 | H | -3.334195 | 4.83763   | -0.938168 |
| O             | 2.212197  | -1.742127 | -1.738476 | H | 3.664979  | 0.195834  | -2.38127  |
| C             | 3.834357  | 0.553361  | -1.364832 | H | 5.061888  | 2.247266  | -1.933333 |
| C             | 4.601224  | 1.681579  | -1.123703 | H | 4.363872  | 1.768444  | 2.282648  |
| C             | 4.794094  | 2.119816  | 0.193536  | H | 2.988013  | -0.261016 | 1.831764  |
| C             | 4.213266  | 1.419715  | 1.258089  | H | 5.605475  | 3.422757  | 1.320831  |
| C             | 3.447396  | 0.287402  | 1.00927   | H | -2.326271 | -3.528432 | -1.31961  |

| Conformer 3_3 |          |          |           |   |          |          |          |
|---------------|----------|----------|-----------|---|----------|----------|----------|
| C             | 6.058903 | 0.183854 | -0.967845 | O | -8.64961 | 0.773017 | 0.443007 |

|   |           |           |           |   |           |           |           |
|---|-----------|-----------|-----------|---|-----------|-----------|-----------|
| C | 5.656399  | 1.335991  | -0.057138 | O | 0.192906  | -1.334753 | 2.530259  |
| C | 4.128089  | 1.44396   | 0.061893  | H | 7.155366  | 0.124803  | -1.017758 |
| C | 3.461498  | 0.111     | 0.530035  | H | 5.692892  | 0.40158   | -1.986968 |
| C | 3.965332  | -1.029238 | -0.34062  | H | 6.07927   | 1.165606  | 0.948289  |
| C | 5.459427  | -1.135787 | -0.486287 | H | 3.746228  | 1.606135  | -0.96472  |
| C | 1.961689  | 0.294017  | 0.418077  | H | 5.711127  | -1.958988 | -1.167862 |
| C | 1.061309  | -0.698645 | -0.189746 | H | 5.895798  | -1.387812 | 0.495487  |
| C | 1.691234  | -1.939576 | -0.774588 | H | 1.508762  | 0.919859  | 1.191676  |
| C | 3.153653  | -1.922746 | -0.931141 | H | 3.561235  | -2.753724 | -1.511073 |
| O | 1.025678  | -2.905406 | -1.084824 | H | -1.180026 | -2.157568 | -1.193479 |
| O | 1.420262  | 0.499735  | -0.865696 | H | -1.028445 | -0.469277 | -1.784317 |
| C | -0.397983 | -0.754976 | 0.267273  | H | -0.197986 | -2.739198 | 1.112841  |
| C | -1.296964 | -1.103198 | -0.9263   | H | -1.634669 | -1.819828 | 1.649383  |
| C | -0.556486 | -1.747822 | 1.419071  | H | -0.86637  | 1.128969  | 0.083717  |
| O | -0.762592 | 0.493405  | 0.809304  | H | 4.10102   | 2.548749  | 1.944365  |
| C | 3.743013  | 2.654457  | 0.909505  | H | 2.657357  | 2.818578  | 0.929205  |
| C | 3.745776  | -0.228715 | 2.005164  | H | 4.216851  | 3.552179  | 0.494965  |
| O | 6.227607  | 2.546897  | -0.49343  | H | 3.196812  | -1.139648 | 2.284258  |
| O | -2.668646 | -0.910256 | -0.601484 | H | 4.815135  | -0.384485 | 2.200496  |
| C | -3.184348 | 0.312418  | -0.786205 | H | 3.39519   | 0.580971  | 2.660113  |
| C | -4.627418 | 0.379623  | -0.447328 | H | 5.892945  | 2.728752  | -1.380389 |
| O | -2.541026 | 1.249946  | -1.193548 | H | -4.709063 | 2.46639   | -0.943494 |
| C | -5.283765 | 1.609206  | -0.590223 | H | -7.160641 | 2.675609  | -0.39293  |
| C | -6.630688 | 1.728934  | -0.289223 | H | -7.252071 | -1.492954 | 0.657948  |
| C | -7.342627 | 0.609125  | 0.16218   | H | -4.830291 | -1.69114  | 0.110843  |
| C | -6.692634 | -0.622709 | 0.306326  | H | -9.02845  | -0.060843 | 0.743231  |
| C | -5.34135  | -0.734876 | 0.001817  | H | -0.086962 | -0.429166 | 2.71928   |

| Conformer 3_4 |          |           |           |   |           |           |           |
|---------------|----------|-----------|-----------|---|-----------|-----------|-----------|
| C             | 6.057584 | 0.191945  | -0.970176 | O | -8.653281 | 0.648201  | 0.473502  |
| C             | 5.652948 | 1.343946  | -0.060245 | O | 0.199137  | -1.334538 | 2.533039  |
| C             | 4.124463 | 1.448602  | 0.05945   | H | 7.154155  | 0.135212  | -1.02046  |
| C             | 3.461086 | 0.114586  | 0.529065  | H | 5.690729  | 0.408148  | -1.98933  |
| C             | 3.966822 | -1.025109 | -0.341209 | H | 6.076712  | 1.17544   | 0.945114  |
| C             | 5.461078 | -1.128639 | -0.487515 | H | 3.741734  | 1.609049  | -0.967115 |
| C             | 1.960805 | 0.294264  | 0.41812   | H | 5.714166  | -1.951701 | -1.16874  |
| C             | 1.062168 | -0.700526 | -0.188639 | H | 5.898454  | -1.379217 | 0.494176  |
| C             | 1.694314 | -1.940237 | -0.773651 | H | 1.507063  | 0.919312  | 1.191877  |
| C             | 3.156677 | -1.920524 | -0.930905 | H | 3.565619  | -2.750962 | -1.510654 |
| O             | 1.030553 | -2.907358 | -1.083481 | H | -1.178644 | -2.167821 | -1.185988 |
| O             | 1.417931 | 0.498444  | -0.865365 | H | -1.029092 | -0.481201 | -1.78211  |

|   |           |           |           |   |           |           |           |
|---|-----------|-----------|-----------|---|-----------|-----------|-----------|
| C | -0.39649  | -0.76001  | 0.269981  | H | -0.19027  | -2.742253 | 1.118473  |
| C | -1.296085 | -1.11276  | -0.921879 | H | -1.628528 | -1.82602  | 1.655704  |
| C | -0.550948 | -1.751332 | 1.423643  | H | -0.868126 | 1.122389  | 0.082908  |
| O | -0.763664 | 0.488595  | 0.809916  | H | 4.095557  | 2.554829  | 1.941043  |
| C | 3.737101  | 2.65898   | 0.906181  | H | 2.651089  | 2.82075   | 0.926032  |
| C | 3.747166  | -0.223481 | 2.004218  | H | 4.208986  | 3.557341  | 0.490781  |
| O | 6.221205  | 2.555787  | -0.497952 | H | 3.200324  | -1.135364 | 2.284351  |
| O | -2.667689 | -0.920094 | -0.596323 | H | 4.816996  | -0.37683  | 2.198885  |
| C | -3.184848 | 0.300842  | -0.783914 | H | 3.395279  | 0.585867  | 2.658891  |
| C | -4.627919 | 0.36695   | -0.444367 | H | 5.886337  | 2.73549   | -1.385267 |
| O | -2.543216 | 1.238553  | -1.194364 | H | -4.831671 | -1.703319 | 0.120536  |
| C | -5.344784 | -0.748334 | 0.009329  | H | -7.271047 | -1.491956 | 0.6682    |
| C | -6.693066 | -0.638803 | 0.313445  | H | -7.142403 | 2.67024   | -0.403524 |
| C | -7.343339 | 0.593525  | 0.165239  | H | -4.708518 | 2.450747  | -0.946658 |
| C | -6.631642 | 1.711078  | -0.289011 | H | -8.987361 | 1.541015  | 0.331139  |
| C | -5.281506 | 1.593461  | -0.59099  | H | -0.084845 | -0.43046  | 2.722945  |

| Conformer 3_5 |            |            |            |   |            |            |            |
|---------------|------------|------------|------------|---|------------|------------|------------|
| C             | -3.6856563 | 3.12944699 | -3.057654  | O | 4.99516989 | -5.2533028 | 5.77387385 |
| C             | -2.6464934 | 4.03089438 | -2.3962828 | O | 1.95465975 | -0.9474846 | -1.8312765 |
| C             | -1.7850212 | 3.26176965 | -1.3681527 | H | -4.2510616 | 3.70146419 | -3.8036753 |
| C             | -1.1214875 | 1.97213608 | -1.9780573 | H | -4.4250448 | 2.80827593 | -2.3115856 |
| C             | -2.1939873 | 1.1609315  | -2.7213721 | H | -2.0051775 | 4.48384606 | -3.1612446 |
| C             | -3.0420129 | 1.91945332 | -3.7146972 | H | -2.4582222 | 2.94702288 | -0.5562146 |
| C             | -0.437107  | 1.18855446 | -0.8638235 | H | -3.8319367 | 1.28379336 | -4.133249  |
| C             | -0.6810311 | -0.3021603 | -0.671354  | H | -2.4241175 | 2.2355426  | -4.5629935 |
| C             | -1.6768958 | -0.9757863 | -1.5484142 | H | 0.51590718 | 1.61008717 | -0.5700242 |
| C             | -2.4181182 | -0.1494557 | -2.5236225 | H | -3.1826055 | -0.6902514 | -3.0726157 |
| O             | -1.9054113 | -2.1768144 | -1.4613067 | H | -0.8178154 | -2.8976608 | 0.54135513 |
| O             | -1.283066  | 0.69899753 | 0.18550701 | H | -0.9208877 | -1.6085175 | 1.72453238 |
| C             | 0.39873219 | -1.1379444 | 0.03015852 | H | 0.66652794 | -2.5423163 | -1.6580273 |
| C             | -0.230631  | -2.1258372 | 1.04600107 | H | 2.02314775 | -2.5011353 | -0.5166206 |
| C             | 1.25688033 | -1.8916806 | -1.007651  | H | 0.92228779 | -0.031652  | 1.57801736 |
| O             | 1.32837024 | -0.2526194 | 0.71172947 | H | -0.1113537 | 4.67729318 | -1.4568809 |
| C             | -0.7767041 | 4.22509658 | -0.7148326 | H | -0.1632295 | 3.7209904  | 0.03716019 |
| C             | -0.0163345 | 2.32530869 | -3.0083861 | H | -1.2952202 | 5.04113399 | -0.1998156 |
| O             | -3.330566  | 5.09818771 | -1.7390545 | H | 0.38861033 | 1.41644455 | -3.4714299 |
| O             | 0.76907336 | -2.8310756 | 1.81301105 | H | -0.3772958 | 2.97223783 | -3.8134772 |
| C             | 1.21383595 | -2.1911555 | 2.92332462 | H | 0.83062264 | 2.83532101 | -2.5357321 |
| C             | 2.20775393 | -3.0212467 | 3.65471834 | H | -3.8499543 | 5.57677221 | -2.4076114 |
| O             | 0.86641462 | -1.0746742 | 3.27971829 | H | 2.1527368  | -4.7400553 | 2.32539517 |

|   |            |            |            |   |            |            |            |
|---|------------|------------|------------|---|------------|------------|------------|
| C | 2.58177199 | -4.3012706 | 3.22253411 | H | 3.81368917 | -6.0301308 | 3.61632145 |
| C | 3.52127663 | -5.0374515 | 3.94851592 | H | 4.15827616 | -2.8002    | 6.44128425 |
| C | 4.08350867 | -4.4972135 | 5.09989185 | H | 2.50268763 | -1.4976732 | 5.16570426 |
| C | 3.72384343 | -3.2287905 | 5.54340407 | H | 5.30352427 | -4.7559879 | 6.54930997 |
| C | 2.78417237 | -2.490476  | 4.81882777 | H | 2.38096494 | -0.3389822 | -1.1931607 |

| Conformer 4_1 |           |           |           |   |           |           |           |
|---------------|-----------|-----------|-----------|---|-----------|-----------|-----------|
| C             | 1.937348  | -0.553228 | -2.071236 | H | 2.816218  | -0.946315 | -2.599989 |
| C             | 2.374039  | 0.068302  | -0.754853 | H | 1.480582  | 0.233313  | -2.692778 |
| C             | 1.195029  | 0.617401  | 0.049127  | H | 2.927819  | -0.680427 | -0.164011 |
| C             | 0.108134  | -0.476119 | 0.306843  | H | 0.70396   | 1.376042  | -0.584624 |
| C             | -0.240066 | -1.158185 | -1.009309 | H | 0.571302  | -2.105808 | -2.752946 |
| C             | 0.926069  | -1.668591 | -1.810726 | H | 1.423126  | -2.477341 | -1.248255 |
| C             | -1.090082 | 0.229525  | 0.916903  | H | -0.9933   | 0.522403  | 1.96784   |
| C             | -2.474895 | 0.015061  | 0.456586  | H | -1.698177 | -1.871579 | -2.378148 |
| C             | -2.694535 | -0.912549 | -0.707326 | H | -5.310032 | 1.5262    | 1.559427  |
| C             | -1.499515 | -1.336062 | -1.447354 | H | -4.604399 | 1.495793  | -0.07436  |
| O             | -3.809704 | -1.291264 | -1.008898 | H | -3.04871  | -1.418718 | 2.739561  |
| O             | 3.254098  | 1.166924  | -1.005536 | H | -4.777577 | -0.769296 | 2.975473  |
| O             | -1.739326 | 1.183017  | 0.116956  | H | -5.465913 | -0.67638  | -0.185371 |
| C             | -3.636877 | 0.238655  | 1.38258   | H | 5.316575  | 2.751526  | -0.60107  |
| C             | -4.893796 | 0.864217  | 0.786982  | H | 6.370922  | 1.859373  | -1.753698 |
| C             | -3.774208 | -0.615327 | 2.567787  | H | 4.884789  | 2.70765   | -2.317826 |
| O             | -3.260867 | 0.695637  | 2.665298  | H | 2.243699  | 0.595744  | 1.965019  |
| O             | -5.870212 | -0.076652 | 0.45872   | H | 0.860353  | 1.721998  | 1.910941  |
| C             | 4.540544  | 0.876159  | -1.269836 | H | 2.364143  | 2.118399  | 1.062613  |
| C             | 5.340267  | 2.12777   | -1.50465  | H | -0.212706 | -2.316825 | 1.420273  |
| O             | 4.967464  | -0.244639 | -1.303453 | H | 1.494144  | -2.045588 | 0.998923  |
| C             | 1.686479  | 1.297243  | 1.325789  | H | 0.741117  | -1.099382 | 2.300263  |
| C             | 0.566674  | -1.548078 | 1.31235   |   |           |           |           |

| Conformer 4_2 |           |           |           |   |           |           |           |
|---------------|-----------|-----------|-----------|---|-----------|-----------|-----------|
| C             | 1.926264  | -0.607352 | -2.140065 | H | 2.809607  | -0.988587 | -2.670175 |
| C             | 2.358565  | 0.034547  | -0.832149 | H | 1.451388  | 0.164846  | -2.766051 |
| C             | 1.174193  | 0.570232  | -0.027251 | H | 2.928697  | -0.698246 | -0.236942 |
| C             | 0.109434  | -0.540341 | 0.248133  | H | 0.665661  | 1.312611  | -0.666446 |
| C             | -0.234798 | -1.243614 | -1.059103 | H | 0.585241  | -2.190709 | -2.798937 |
| C             | 0.937377  | -1.73838  | -1.862841 | H | 1.453516  | -2.532888 | -1.297011 |
| C             | -1.097933 | 0.150776  | 0.858009  | H | -1.000339 | 0.455459  | 1.905557  |
| C             | -2.480048 | -0.093437 | 0.403851  | H | -1.685593 | -2.008725 | -2.405345 |

|   |           |           |           |   |           |           |           |
|---|-----------|-----------|-----------|---|-----------|-----------|-----------|
| C | -2.695188 | -1.060453 | -0.731847 | H | -4.406814 | 1.815638  | 0.295372  |
| C | -1.492702 | -1.455852 | -1.483315 | H | -5.299556 | 0.297344  | -0.008791 |
| O | -3.798213 | -1.491281 | -0.983244 | H | -3.131639 | -1.613212 | 2.614946  |
| O | 3.217726  | 1.146603  | -1.097869 | H | -4.848891 | -0.920962 | 2.84808   |
| O | -1.766688 | 1.083462  | 0.049009  | H | -5.256285 | 1.584351  | 2.497915  |
| C | -3.637931 | 0.121657  | 1.3323    | H | 5.25699   | 2.770688  | -0.715418 |
| C | -4.812824 | 0.901251  | 0.767968  | H | 6.316347  | 1.889458  | -1.871469 |
| C | -3.834886 | -0.78756  | 2.462608  | H | 4.810045  | 2.707284  | -2.427744 |
| O | -3.287177 | 0.509539  | 2.647014  | H | 2.237944  | 0.589851  | 1.880474  |
| O | -5.74785  | 1.18905   | 1.76549   | H | 0.830737  | 1.685536  | 1.826902  |
| C | 4.508199  | 0.877231  | -1.363552 | H | 2.319038  | 2.106026  | 0.962956  |
| C | 5.283296  | 2.141237  | -1.61502  | H | -0.171656 | -2.372399 | 1.385366  |
| O | 4.956915  | -0.235333 | -1.385919 | H | 1.526828  | -2.077277 | 0.947809  |
| C | 1.66108   | 1.273075  | 1.238824  | H | 0.768309  | -1.129427 | 2.24478   |
| C | 0.593613  | -1.591721 | 1.263143  |   |           |           |           |

| Conformer 4_3 |           |           |           |   |           |           |           |
|---------------|-----------|-----------|-----------|---|-----------|-----------|-----------|
| C             | 1.776101  | 0.705461  | -2.146369 | H | 2.566486  | 0.663189  | -2.90811  |
| C             | 2.288912  | 0.098805  | -0.851138 | H | 1.526981  | 1.762516  | -1.961422 |
| C             | 1.23238   | 0.106497  | 0.254026  | H | 2.637915  | -0.929673 | -1.043223 |
| C             | -0.081802 | -0.613628 | -0.191075 | H | 0.949406  | 1.161346  | 0.413684  |
| C             | -0.522112 | -0.073286 | -1.547077 | H | 0.12929   | 0.392819  | -3.53534  |
| C             | 0.535713  | -0.051101 | -2.617368 | H | 0.822762  | -1.088178 | -2.862717 |
| C             | -1.114234 | -0.342536 | 0.88987   | H | -0.987617 | -0.893035 | 1.828127  |
| C             | -2.49411  | 0.094065  | 0.593712  | H | -2.056067 | 0.652398  | -2.82096  |
| C             | -2.886547 | 0.255854  | -0.850669 | H | -5.310928 | 0.927087  | 0.881161  |
| C             | -1.776622 | 0.326526  | -1.816657 | H | -5.158126 | 0.787332  | 2.663247  |
| O             | -4.049189 | 0.279692  | -1.184446 | H | -3.43916  | -2.363746 | 1.444548  |
| O             | 3.401795  | 0.855877  | -0.367097 | H | -4.96691  | -1.745163 | 2.300196  |
| O             | -1.500393 | 0.996866  | 1.058031  | H | -3.185561 | 2.189719  | 2.216147  |
| C             | -3.601421 | -0.15897  | 1.577236  | H | 6.62201   | 1.286142  | -0.811215 |
| C             | -4.605448 | 0.965275  | 1.721406  | H | 5.385662  | 2.537744  | -0.423202 |
| C             | -3.95485  | -1.533604 | 1.940188  | H | 5.741906  | 1.267465  | 0.757958  |
| O             | -3.156998 | -0.740576 | 2.790991  | H | 2.185256  | -1.471351 | 1.425799  |
| O             | -3.989935 | 2.221998  | 1.683593  | H | 1.084901  | -0.434458 | 2.372774  |
| C             | 4.600238  | 0.614305  | -0.926913 | H | 2.666559  | 0.179088  | 1.862919  |
| C             | 5.666364  | 1.481856  | -0.316444 | H | -0.852894 | -2.592871 | -0.656475 |
| O             | 4.769497  | -0.195597 | -1.795894 | H | 0.886455  | -2.426129 | -0.987946 |
| C             | 1.817019  | -0.442216 | 1.554619  | H | 0.314574  | -2.573295 | 0.687466  |
| C             | 0.082742  | -2.140508 | -0.295938 |   |           |           |           |



| Conformer 4_4 |           |           |           |   |           |           |           |
|---------------|-----------|-----------|-----------|---|-----------|-----------|-----------|
| C             | 1.655531  | -0.106838 | -2.346121 | H | 2.412468  | -0.422087 | -3.077074 |
| C             | 2.236597  | -0.198414 | -0.944931 | H | 1.395063  | 0.944594  | -2.546918 |
| C             | 1.228545  | 0.206242  | 0.131262  | H | 2.598686  | -1.224776 | -0.7667   |
| C             | -0.08612  | -0.63396  | 0.040061  | H | 0.930302  | 1.245748  | -0.089752 |
| C             | -0.598117 | -0.618613 | -1.395888 | H | -0.044772 | -0.904712 | -3.447017 |
| C             | 0.410004  | -0.985008 | -2.451234 | H | 0.704772  | -2.039983 | -2.317485 |
| C             | -1.077893 | -0.006785 | 1.003485  | H | -0.907171 | -0.197939 | 2.068043  |
| C             | -2.47692  | 0.28046   | 0.641275  | H | -2.193595 | -0.384375 | -2.77527  |
| C             | -2.931422 | -0.027946 | -0.762942 | H | -4.759287 | 1.810552  | 0.72924   |
| C             | -1.868282 | -0.334583 | -1.733821 | H | -5.15463  | 1.535548  | 2.447636  |
| O             | -4.107702 | -0.035895 | -1.046375 | H | -3.7301   | -1.855257 | 1.769941  |
| O             | 3.352402  | 0.687321  | -0.822778 | H | -5.126668 | -0.929924 | 2.568257  |
| O             | -1.485898 | 1.308926  | 0.710806  | H | -2.694806 | 2.6832    | 1.695907  |
| C             | -3.544228 | 0.35099   | 1.696282  | H | 6.541721  | 0.936351  | -1.544324 |
| C             | -4.326175 | 1.645295  | 1.733066  | H | 5.299479  | 2.241191  | -1.566468 |
| C             | -4.100436 | -0.912509 | 2.188786  | H | 5.73457   | 1.476029  | -0.029926 |
| O             | -3.173407 | -0.175184 | 2.952727  | H | 2.260821  | -0.832766 | 1.75142   |
| O             | -3.53704  | 2.717752  | 2.166339  | H | 1.180776  | 0.474221  | 2.305945  |
| C             | 4.531006  | 0.262242  | -1.312373 | H | 2.726849  | 0.865171  | 1.534673  |
| C             | 5.605763  | 1.293363  | -1.105164 | H | -0.829367 | -2.654255 | 0.353149  |
| O             | 4.677458  | -0.806691 | -1.837167 | H | 0.889137  | -2.605055 | -0.103016 |
| C             | 1.87792   | 0.171197  | 1.513666  | H | 0.394144  | -2.146458 | 1.54057   |
| C             | 0.110021  | -2.09638  | 0.48021   |   |           |           |           |

| Conformer 4_5 |           |           |           |   |           |           |           |
|---------------|-----------|-----------|-----------|---|-----------|-----------|-----------|
| C             | 1.887005  | -0.858749 | -2.194085 | H | 2.702727  | -1.312311 | -2.775791 |
| C             | 2.45131   | -0.227643 | -0.929752 | H | 1.414518  | -0.081834 | -2.810014 |
| C             | 1.358058  | 0.428671  | -0.074386 | H | 2.935464  | -1.015307 | -0.330304 |
| C             | 0.265892  | -0.616386 | 0.330059  | H | 0.83659   | 1.162498  | -0.707213 |
| C             | -0.216816 | -1.333838 | -0.924095 | H | 0.402549  | -2.370878 | -2.69442  |
| C             | 0.856399  | -1.91905  | -1.803046 | H | 1.363521  | -2.730991 | -1.253294 |
| C             | -0.851812 | 0.154442  | 1.010505  | H | -0.655897 | 0.479243  | 2.038073  |
| C             | -2.277717 | -0.028747 | 0.679653  | H | -1.810359 | -2.039186 | -2.137245 |
| C             | -2.626779 | -0.988074 | -0.425179 | H | -4.956791 | 1.614757  | 1.970831  |
| C             | -1.514287 | -1.481033 | -1.24656  | H | -4.394843 | 1.513759  | 0.285017  |
| O             | -3.775422 | -1.33693  | -0.617321 | H | -2.699672 | -1.369605 | 3.050369  |
| O             | 3.544198  | 0.656963  | -1.203039 | H | -4.379006 | -0.651127 | 3.410724  |
| O             | -1.53824  | 1.100243  | 0.23469   | H | -5.331047 | -0.630674 | 0.315872  |
| C             | -3.346966 | 0.265697  | 1.693474  | H | 5.408366  | 1.926733  | -2.462466 |
| C             | -4.629423 | 0.917252  | 1.186958  | H | 4.457139  | 3.446795  | -2.652061 |

|   |           |           |           |   |           |           |           |
|---|-----------|-----------|-----------|---|-----------|-----------|-----------|
| C | -3.409971 | -0.546022 | 2.914092  | H | 4.966594  | 2.865933  | -1.027988 |
| O | -2.846575 | 0.747778  | 2.923538  | H | 2.590438  | 0.48704   | 1.73258   |
| O | -5.659812 | 0.001219  | 0.972187  | H | 1.204783  | 1.613225  | 1.758522  |
| C | 3.345722  | 1.78566   | -1.904319 | H | 2.621229  | 1.972855  | 0.76903   |
| C | 4.627654  | 2.564473  | -2.028504 | H | -0.040506 | -2.370638 | 1.576622  |
| O | 2.285532  | 2.120416  | -2.355753 | H | 1.622151  | -2.239345 | 0.965357  |
| C | 1.971987  | 1.159006  | 1.118128  | H | 1.074453  | -1.174322 | 2.27834   |
| C | 0.767659  | -1.661969 | 1.342213  |   |           |           |           |

| Conformer 4_6 |           |           |           |   |           |           |           |
|---------------|-----------|-----------|-----------|---|-----------|-----------|-----------|
| C             | 1.655469  | -0.362157 | -2.352597 | H | 2.463114  | -0.754686 | -2.985216 |
| C             | 2.221313  | 0.044109  | -1.003271 | H | 1.235102  | 0.532182  | -2.839558 |
| C             | 1.147136  | 0.596102  | -0.065529 | H | 2.723256  | -0.823332 | -0.542373 |
| C             | -0.028875 | -0.413531 | 0.134229  | H | 0.703737  | 1.470048  | -0.574552 |
| C             | -0.504034 | -0.930236 | -1.219449 | H | 0.122333  | -1.707225 | -3.115134 |
| C             | 0.569243  | -1.416156 | -2.155736 | H | 1.02956   | -2.324394 | -1.729426 |
| C             | -1.132674 | 0.328669  | 0.86513   | H | -0.915985 | 0.57218   | 1.913111  |
| C             | -2.558619 | 0.185362  | 0.524787  | H | -2.096916 | -1.462955 | -2.516755 |
| C             | -2.907791 | -0.694492 | -0.65151  | H | -3.039675 | -0.848836 | 3.257141  |
| C             | -1.80026  | -1.023121 | -1.562167 | H | -4.798014 | -0.706307 | 2.989223  |
| O             | -4.029064 | -1.124872 | -0.808027 | H | -3.36782  | 2.548411  | 1.665556  |
| O             | 3.195693  | 1.077154  | -1.174129 | H | -4.34113  | 1.813211  | 3.07437   |
| O             | -1.810887 | 1.337956  | 0.168277  | H | -4.323518 | -2.046764 | 1.053925  |
| C             | -3.615057 | 0.352879  | 1.578479  | H | 5.425618  | 2.399453  | -0.718413 |
| C             | -3.824451 | -0.845322 | 2.484115  | H | 6.323896  | 1.559665  | -2.031288 |
| C             | -3.934388 | 1.701606  | 2.062861  | H | 4.904213  | 2.606621  | -2.398129 |
| O             | -4.768642 | 1.036735  | 1.14241   | H | 2.316816  | 0.244637  | 1.744396  |
| O             | -3.728001 | -2.070867 | 1.816571  | H | 1.040814  | 1.473982  | 1.943136  |
| C             | 4.430645  | 0.701143  | -1.551444 | H | 2.509508  | 1.857532  | 1.031735  |
| C             | 5.339706  | 1.891456  | -1.688287 | H | -0.528314 | -2.277387 | 1.126144  |
| O             | 4.740581  | -0.441901 | -1.742984 | H | 1.169916  | -2.208602 | 0.580864  |
| C             | 1.78148   | 1.065175  | 1.243357  | H | 0.65733   | -1.291509 | 2.014     |
| C             | 0.347636  | -1.621615 | 1.01216   |   |           |           |           |

## Spectroscopic data

Figure S5.  $^1\text{H}$  NMR spectrum of **1** in  $\text{CD}_3\text{OD}$

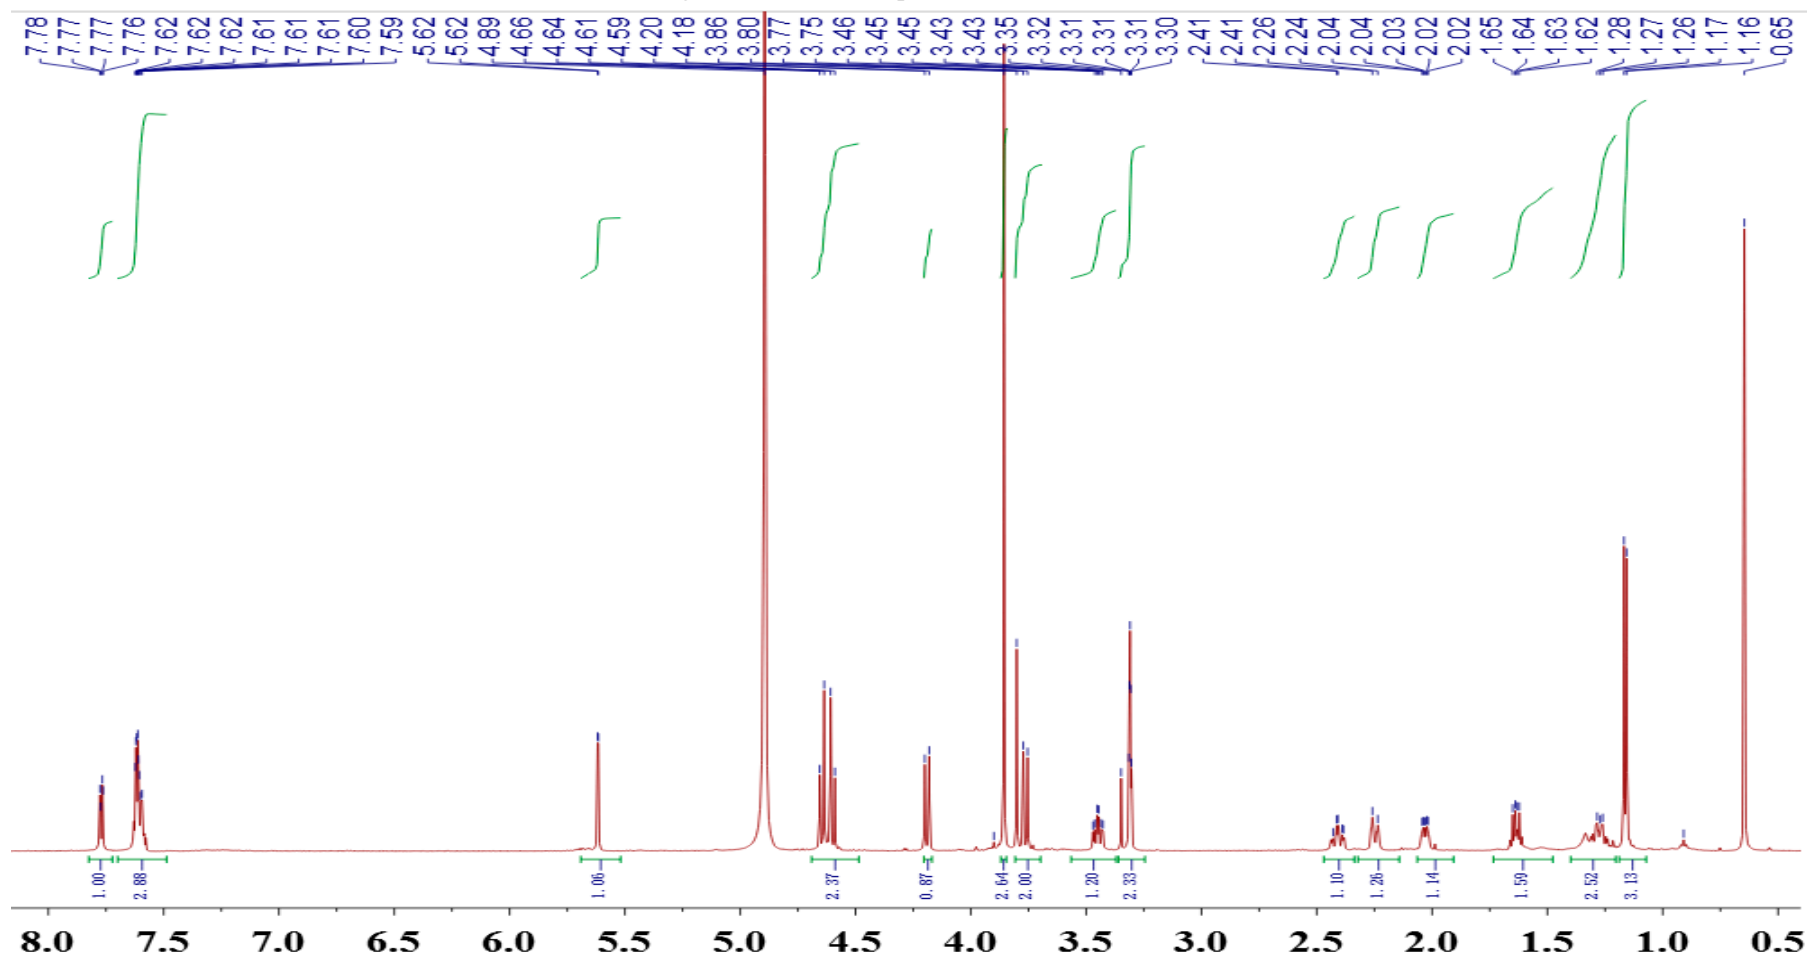

Figure S6  $^{13}\text{C}$  NMR spectrum of **1** in  $\text{CD}_3\text{OD}$

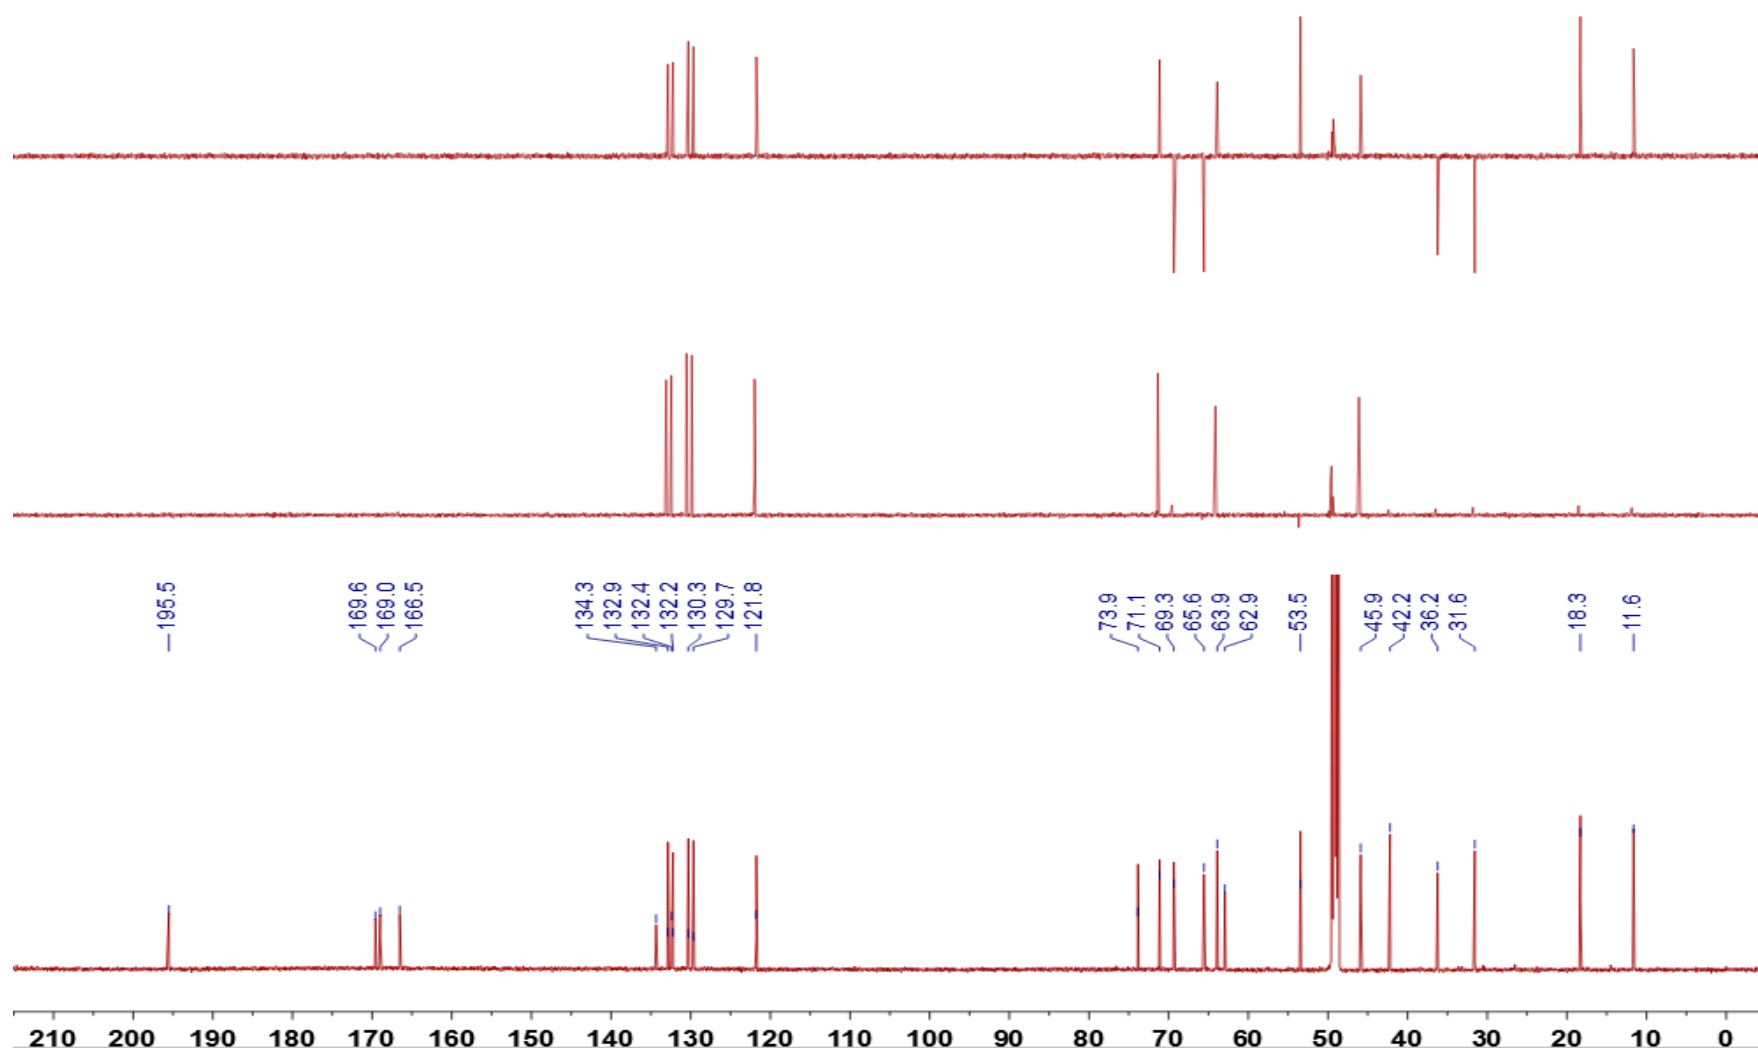

Figure S7 HSQC spectrum of **1** in CD<sub>3</sub>OD

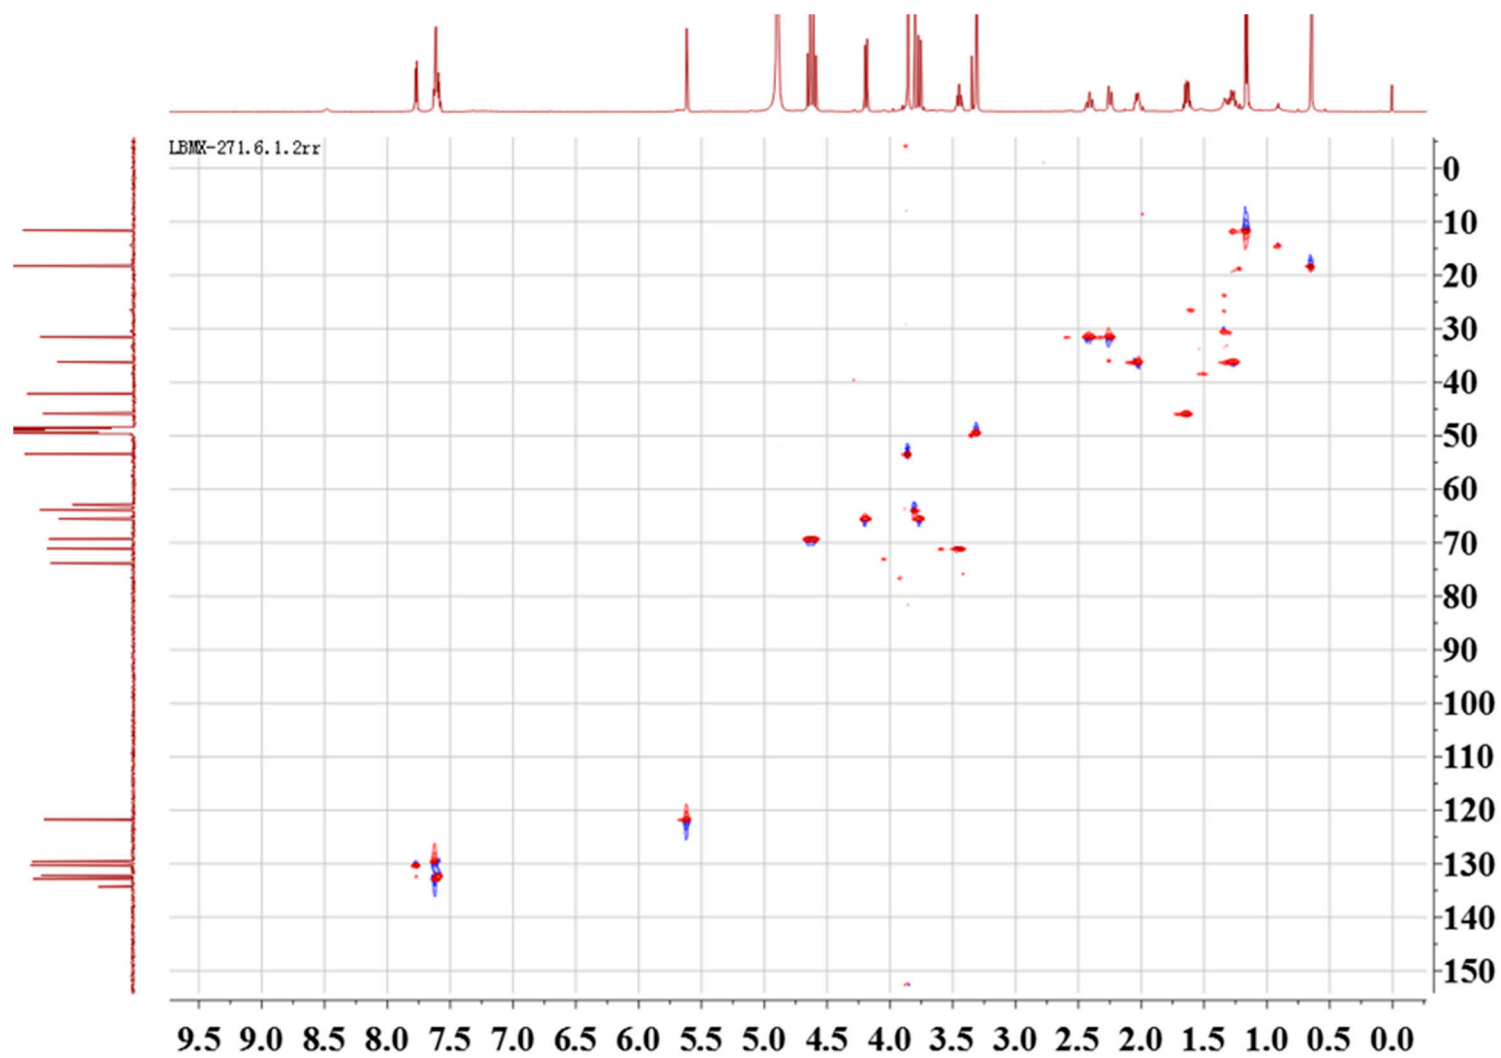

Figure S8 HMBC spectrum of **1** in CD<sub>3</sub>OD

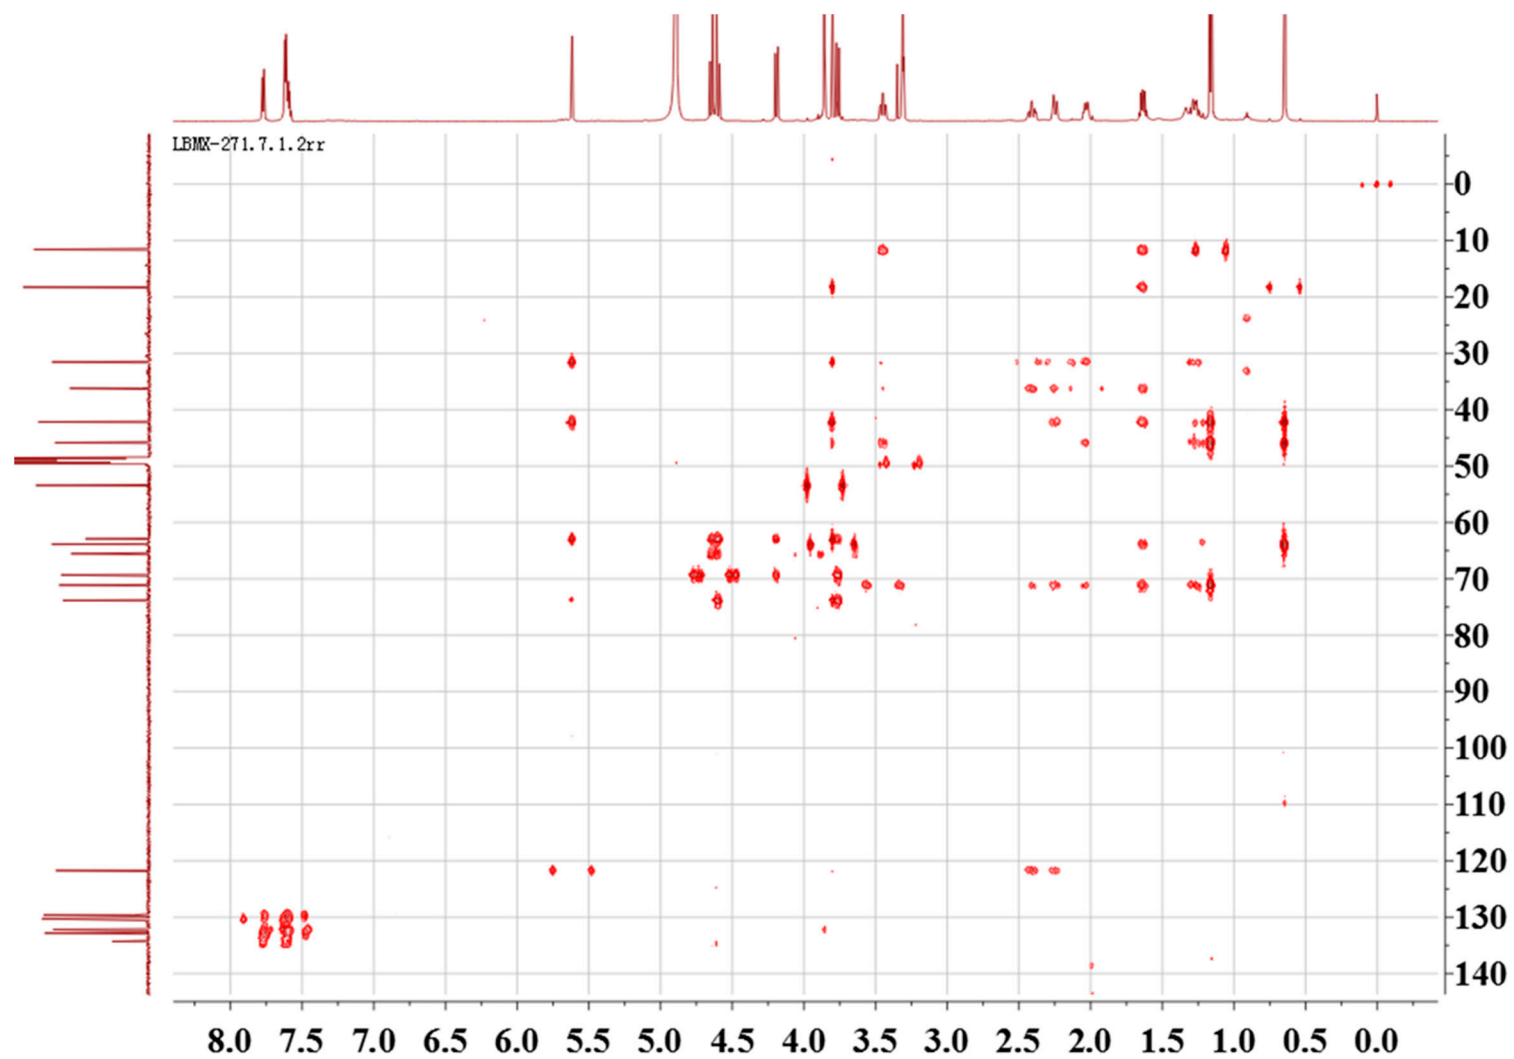

Figure S9 COSY spectrum of **1** in CD<sub>3</sub>OD

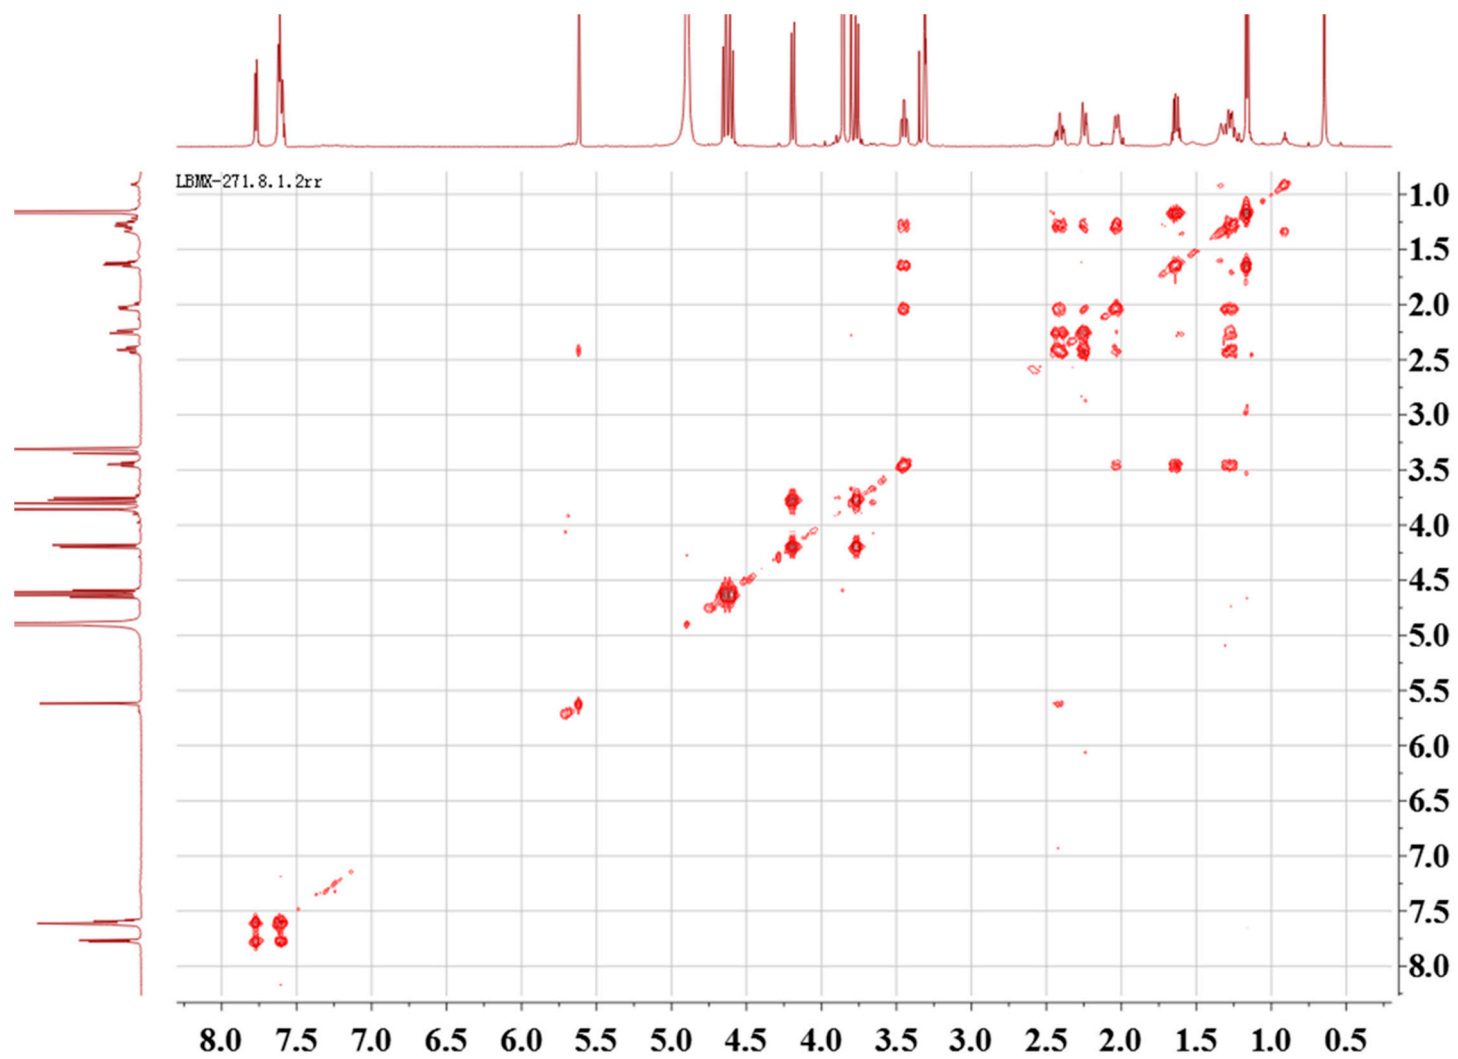

Figure S10 ROESY spectrum of **1** in CD<sub>3</sub>OD

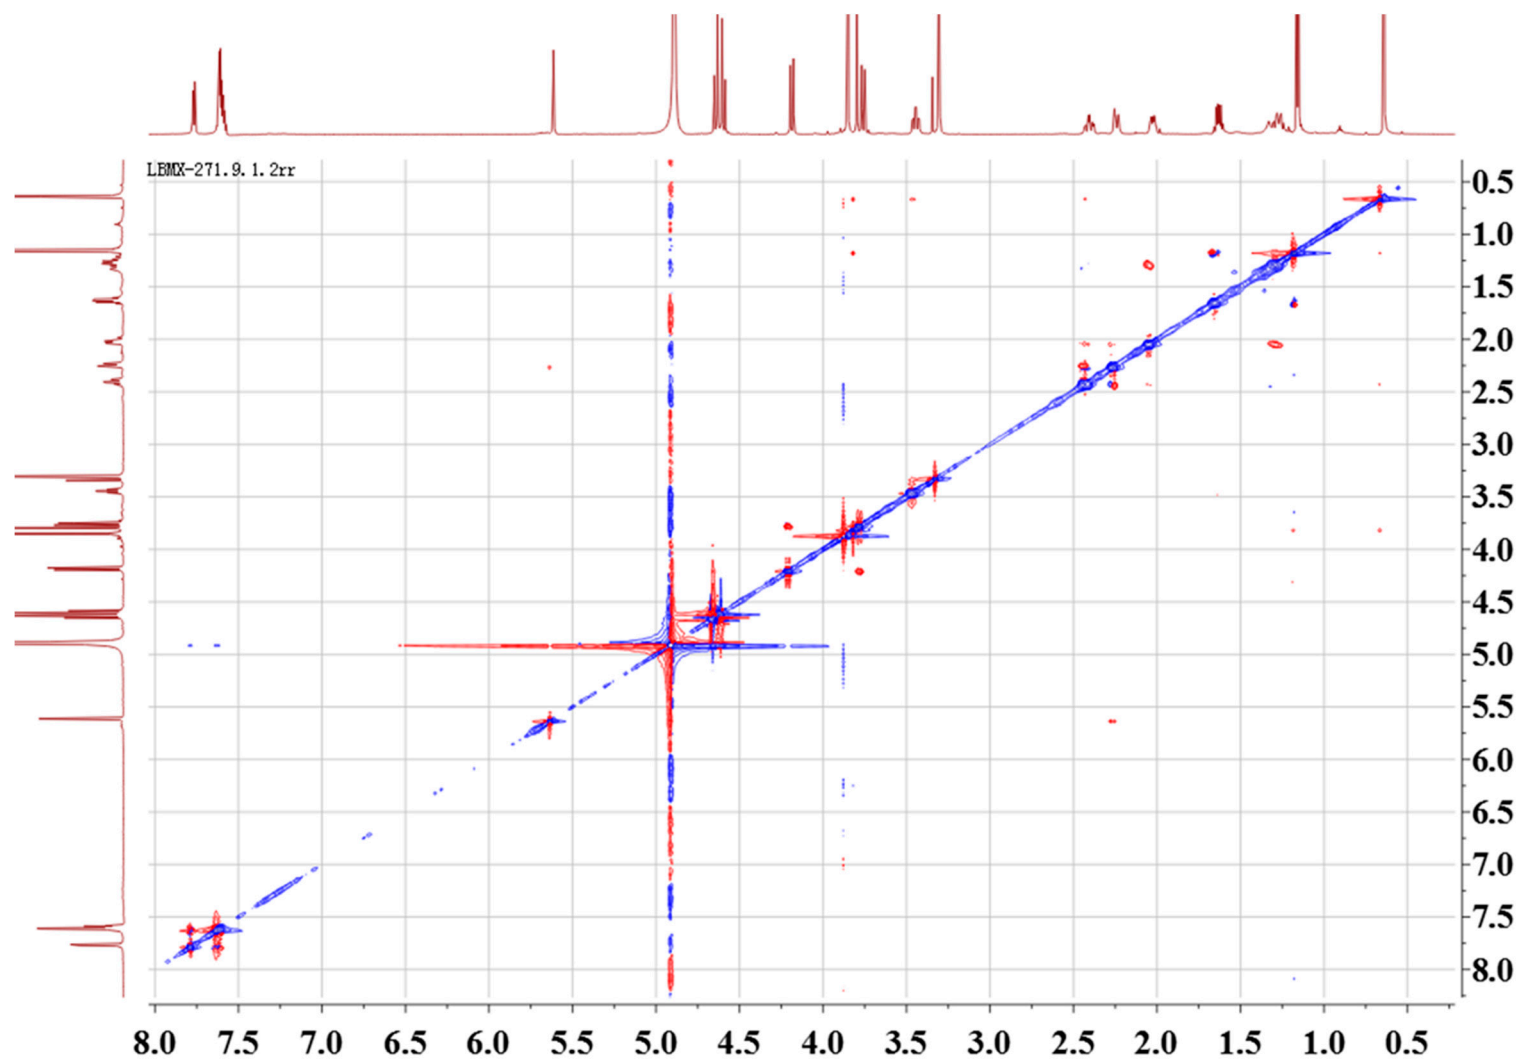



Figure S11 HRMS spectrum of **1**

LBMX-271 #11 RT: 0.14 AV: 1 NL: 7.18E8

T: FTMS + p ESI Full lock ms [150.0000-1100.0000]

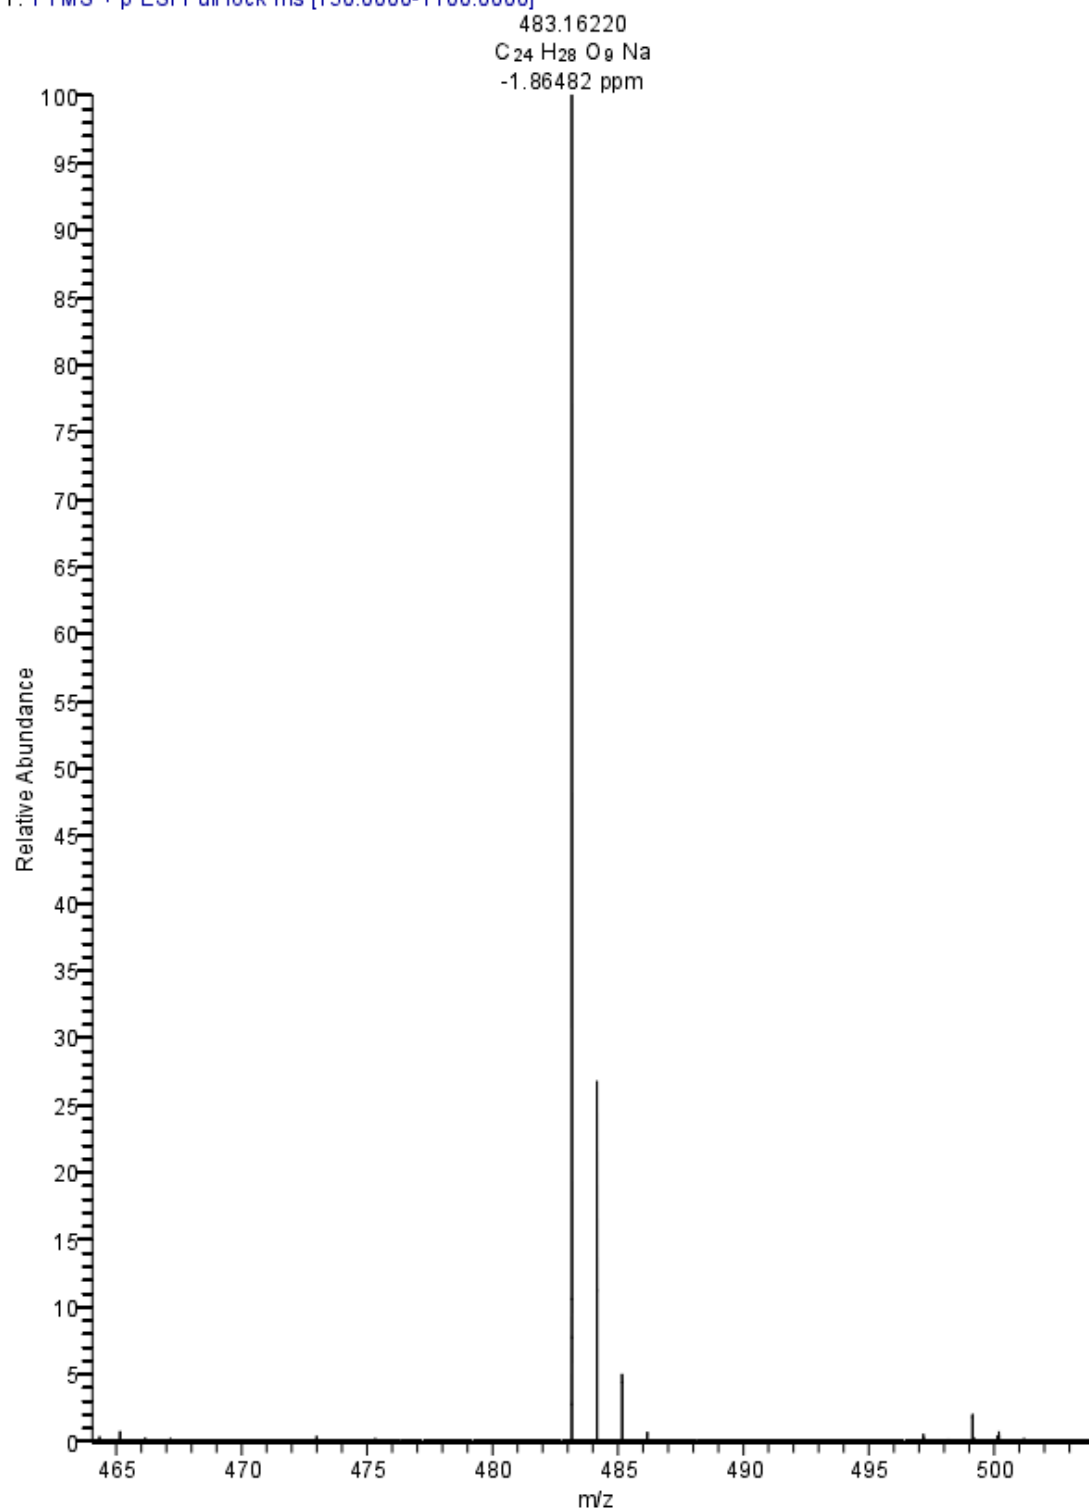

Figure S12  $^1\text{H}$  NMR spectrum of **2** in  $\text{CD}_3\text{OD}$

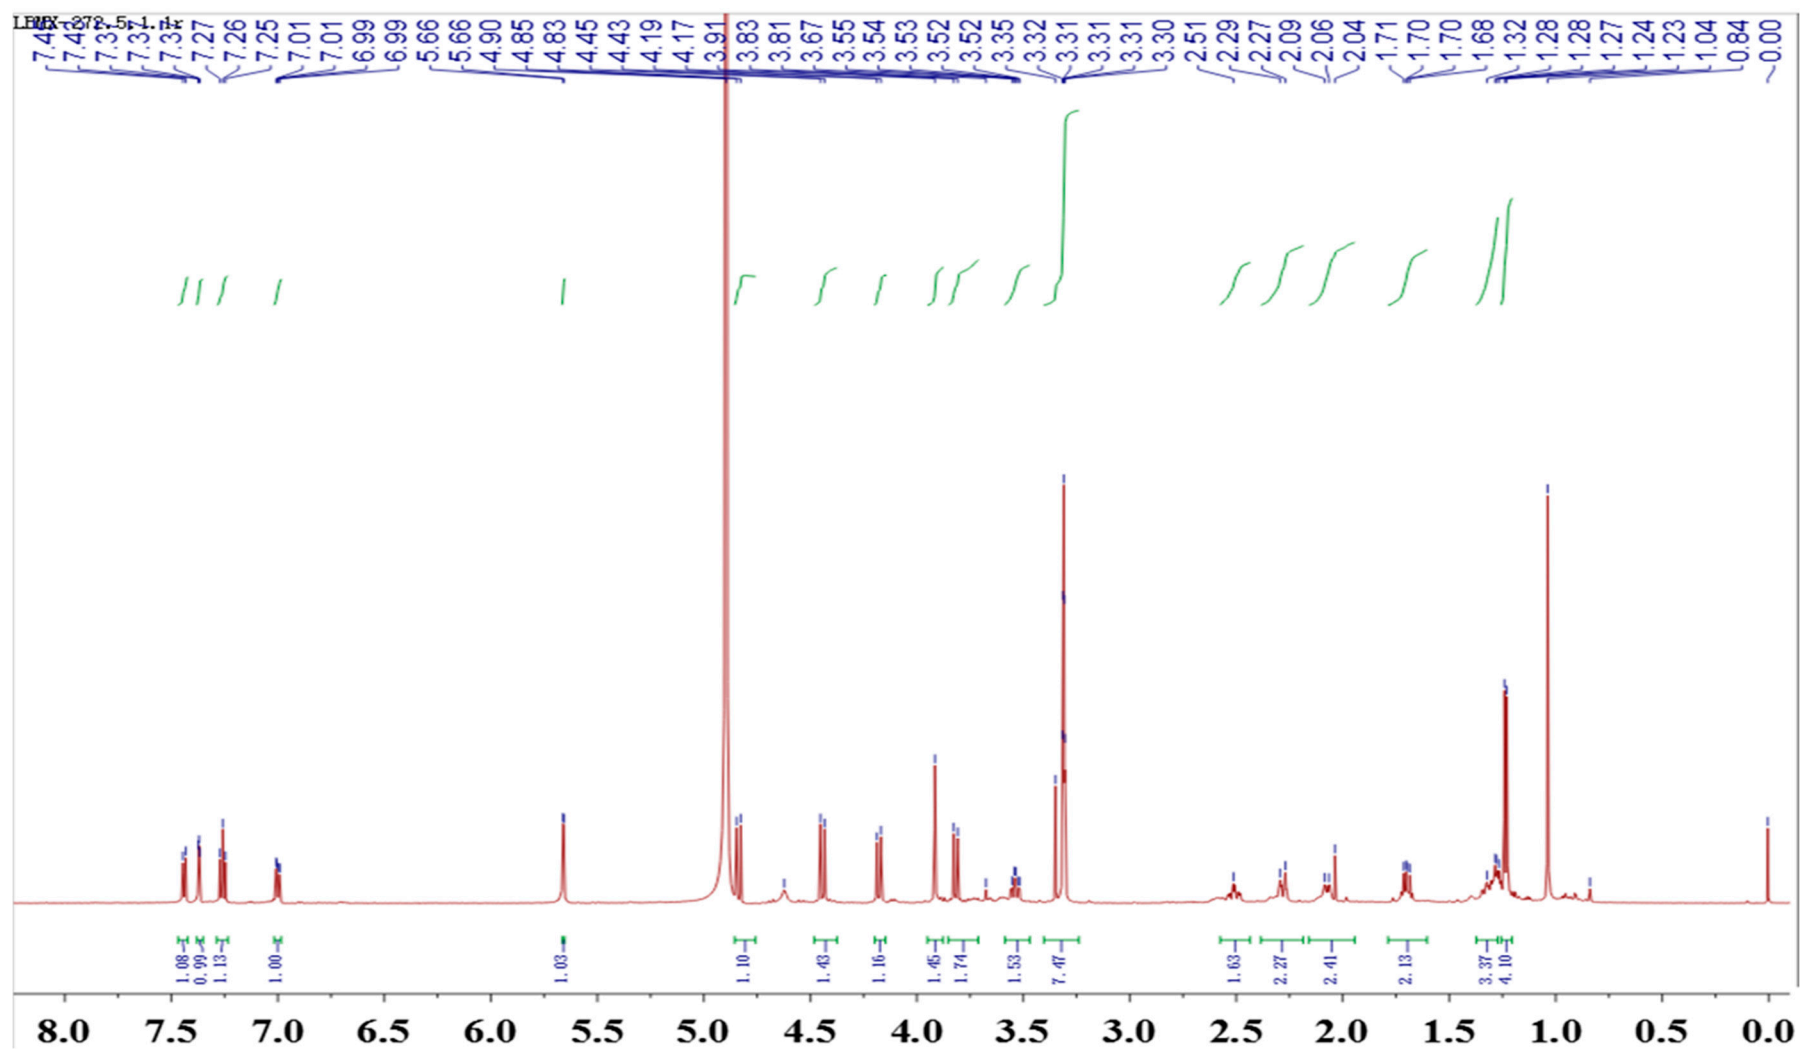

Figure S13  $^{13}\text{C}$  NMR spectrum of **2** in  $\text{CD}_3\text{OD}$

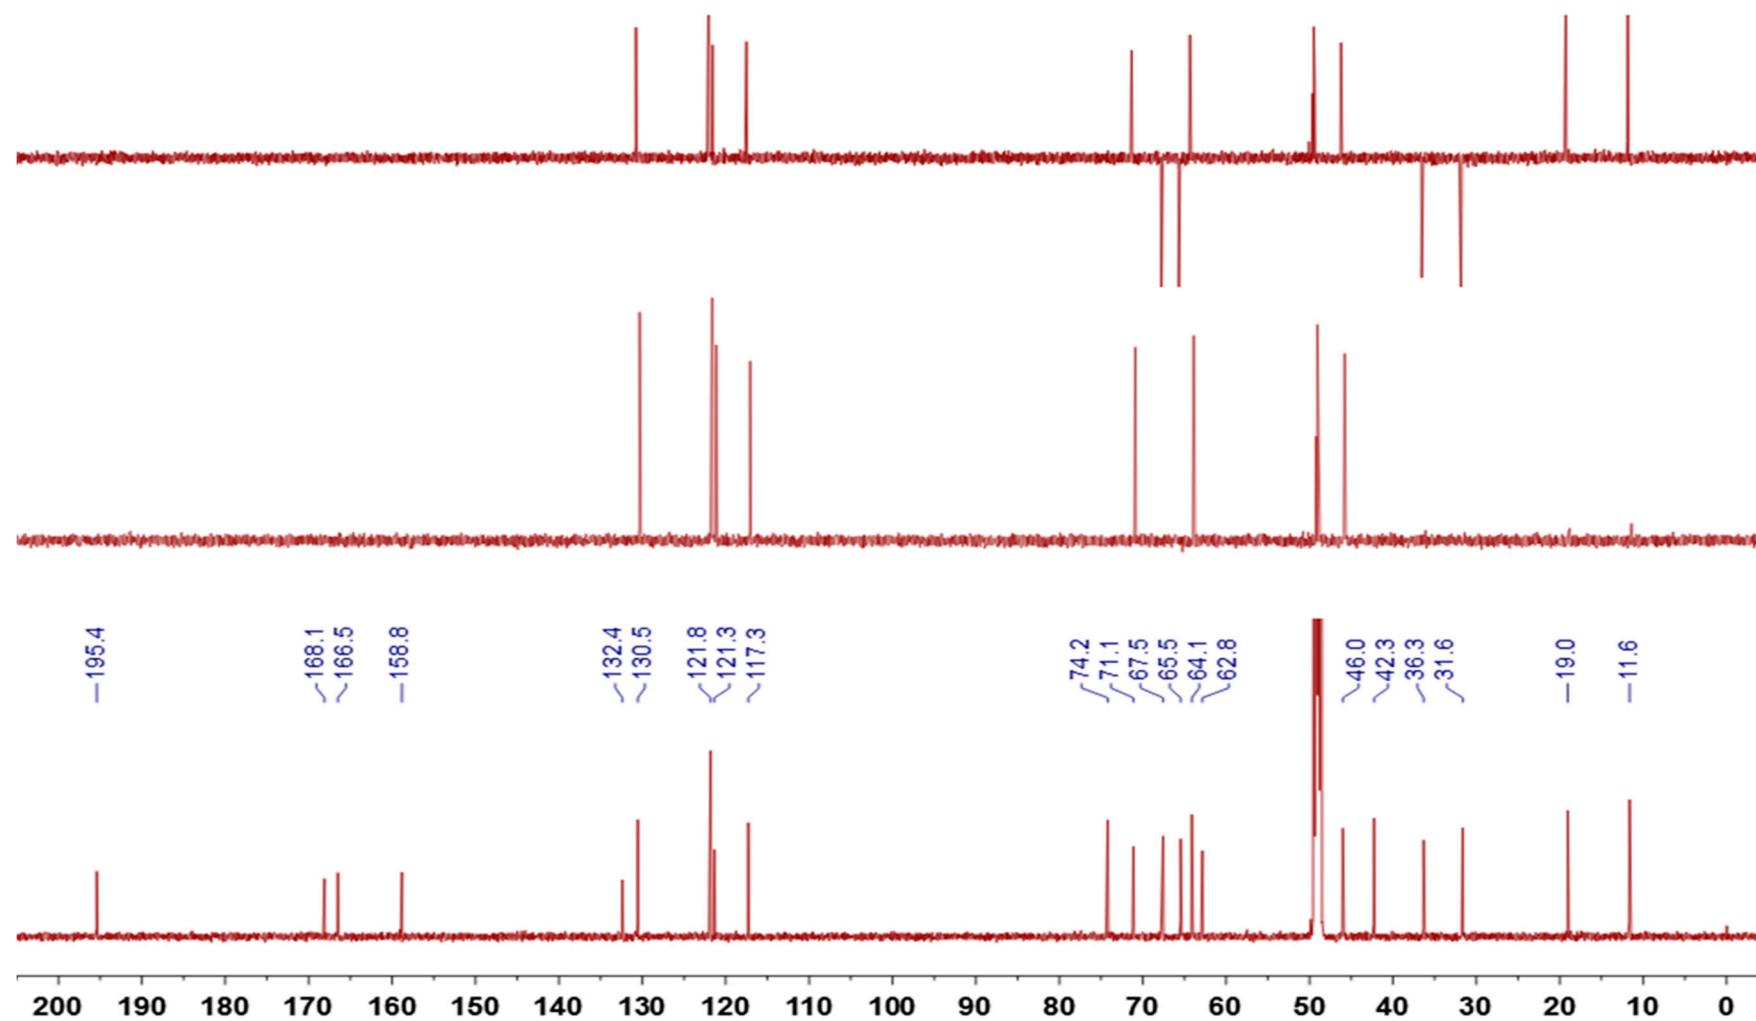

Figure S14 HSQC spectrum of **2** in CD<sub>3</sub>OD

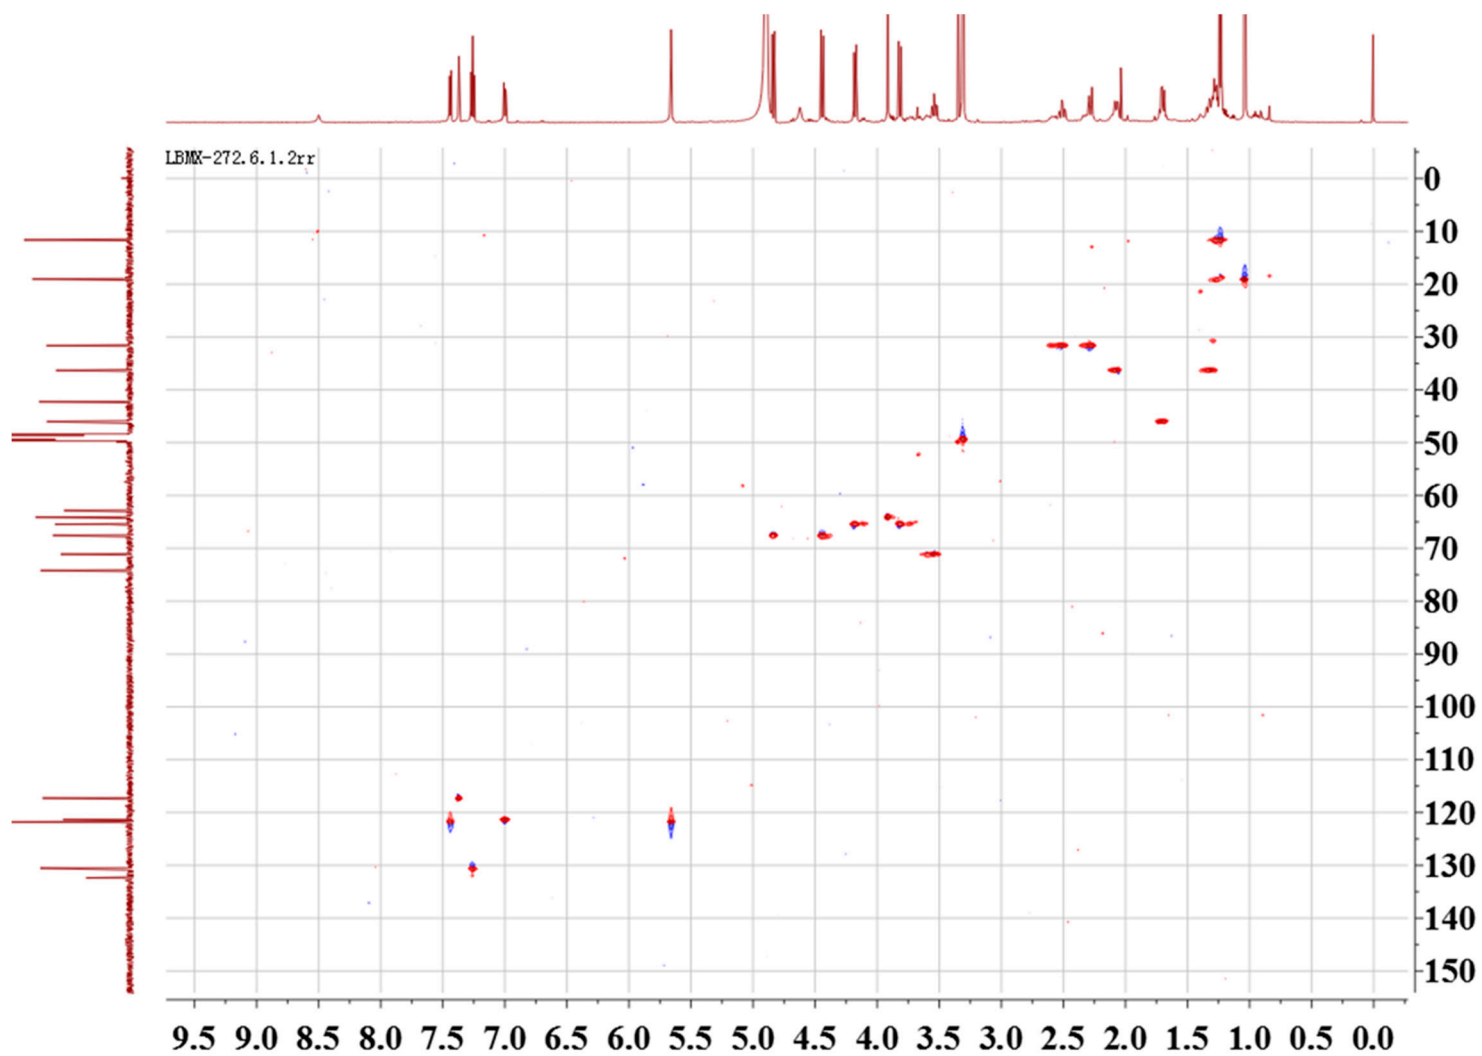

Figure S15 HMBC spectrum of **2** in CD<sub>3</sub>OD

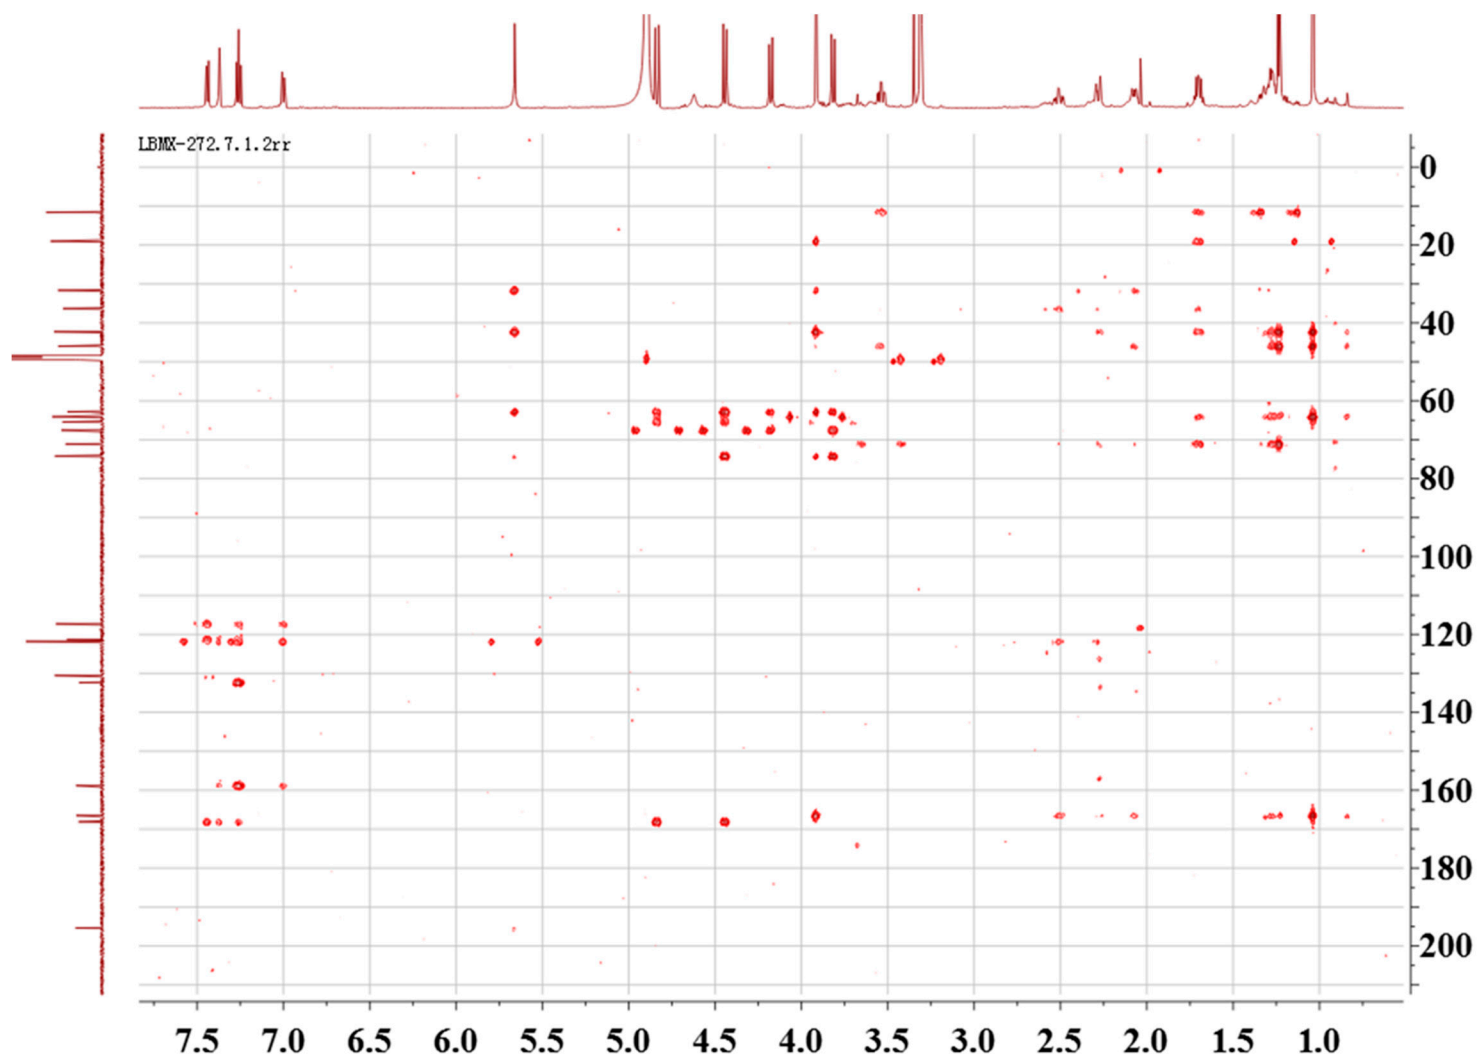

Figure S16 COSY spectrum of **2** in CD<sub>3</sub>OD

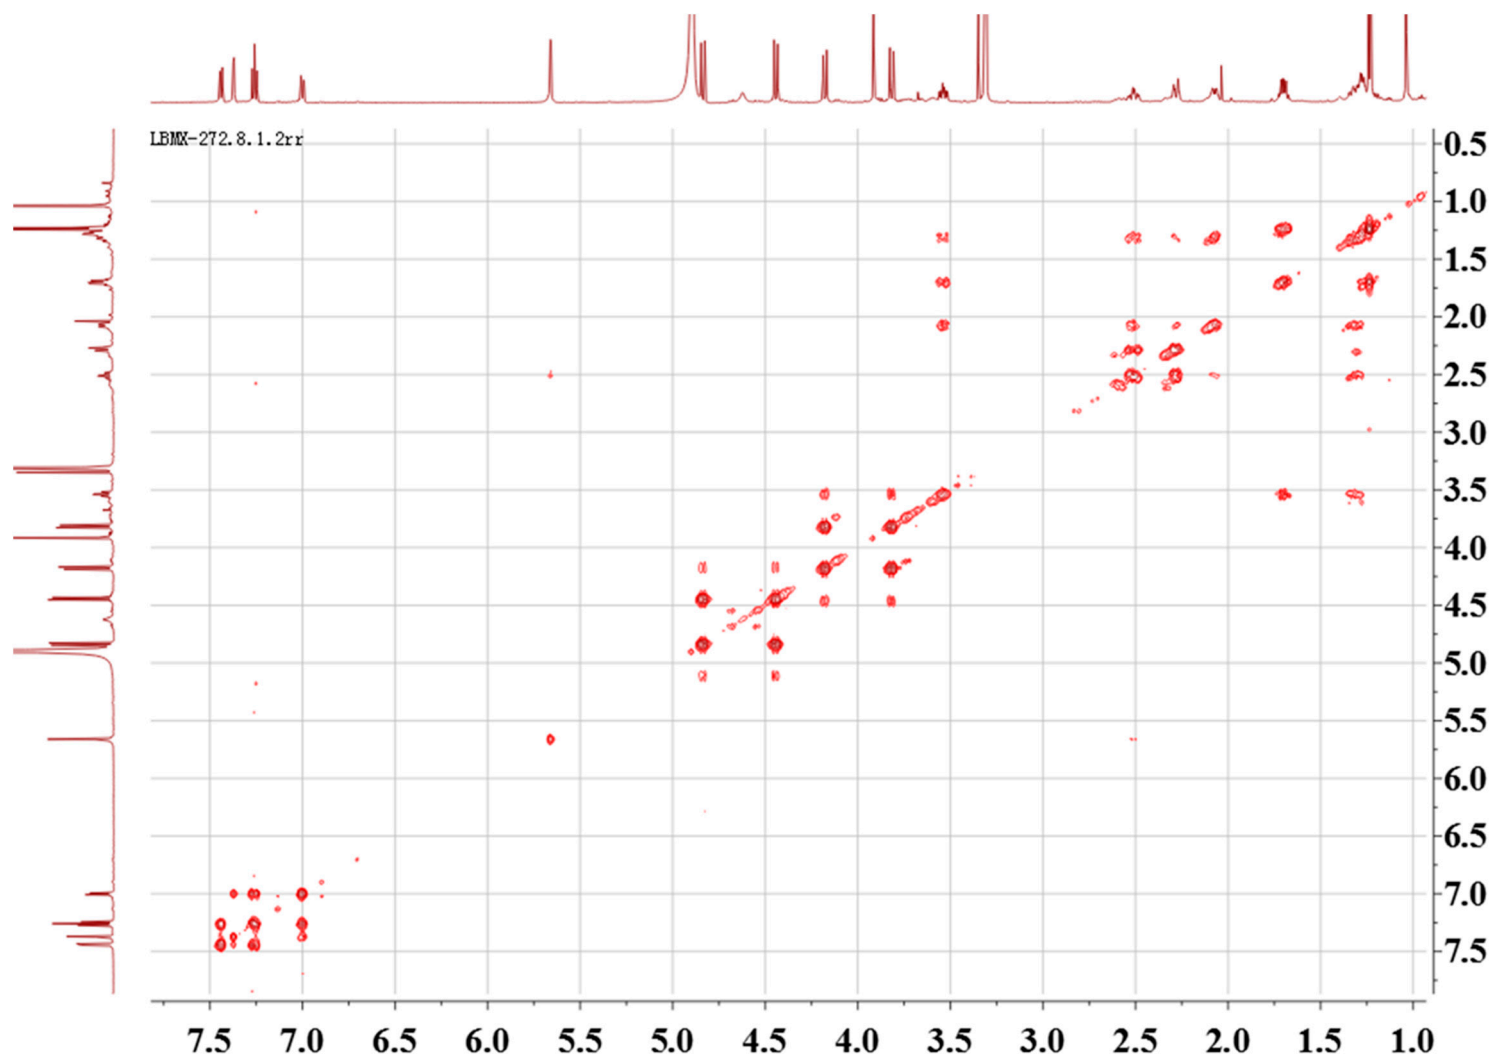

Figure S17 Roesy spectrum of **2** in CD<sub>3</sub>OD

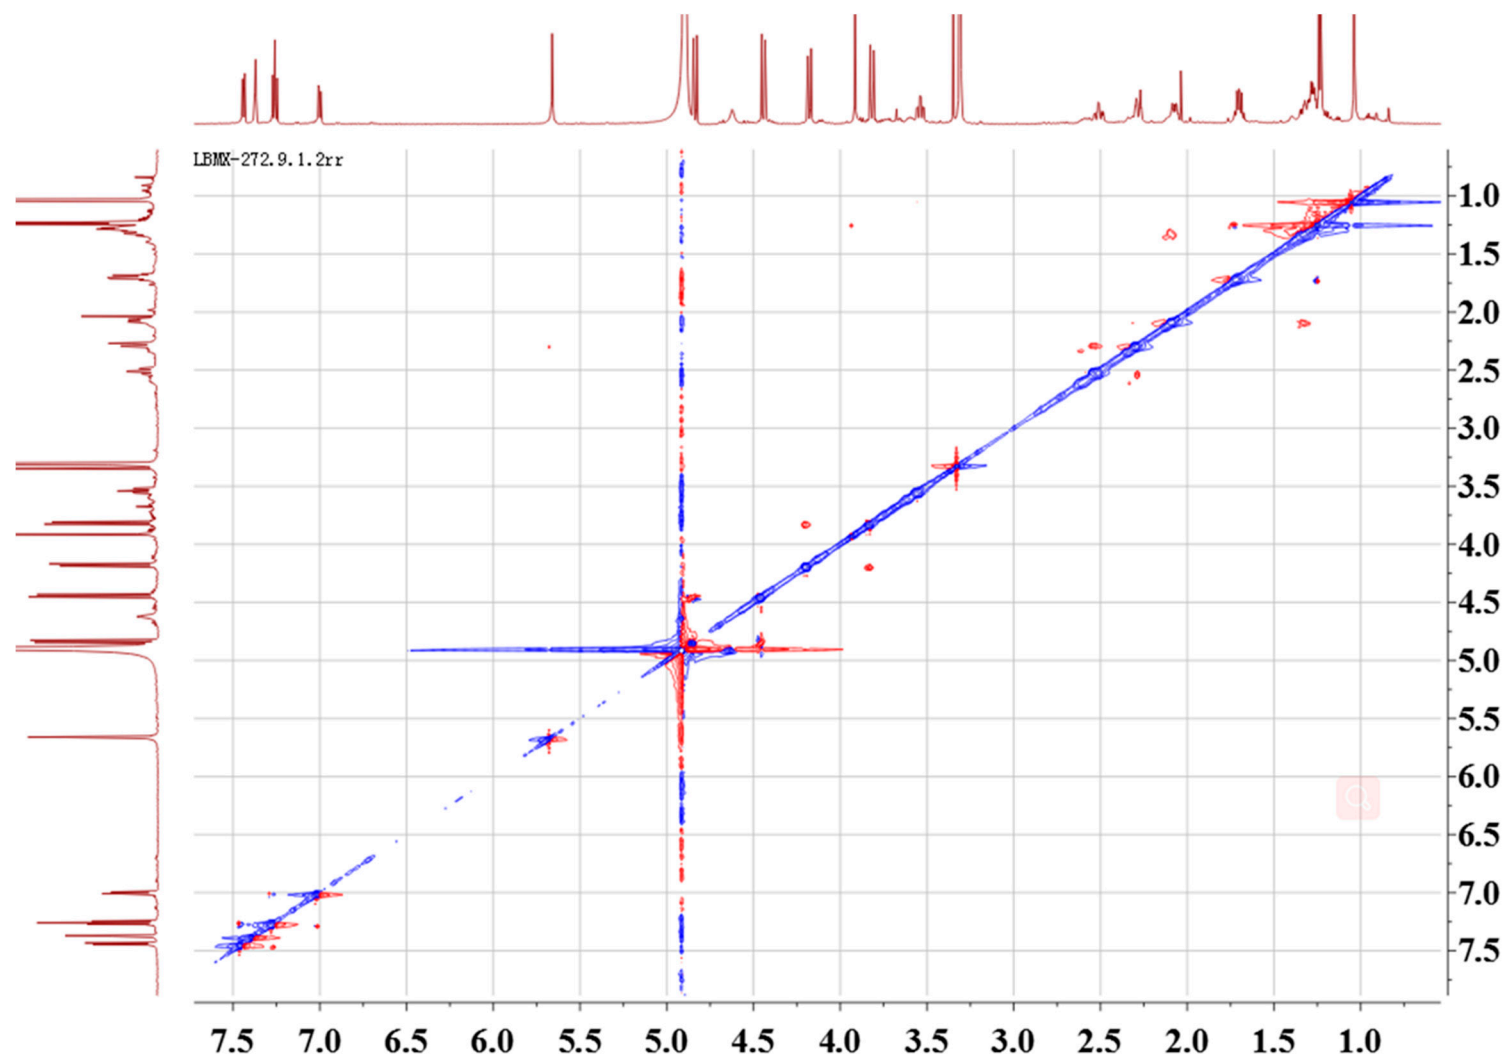

Figure S18 HRMS spectrum of **2**

LBMX-272 #13 RT: 0.17 AV: 1 NL: 1.47E8

T: FTMS + p ESI Full lock ms [150.0000-1100.0000]

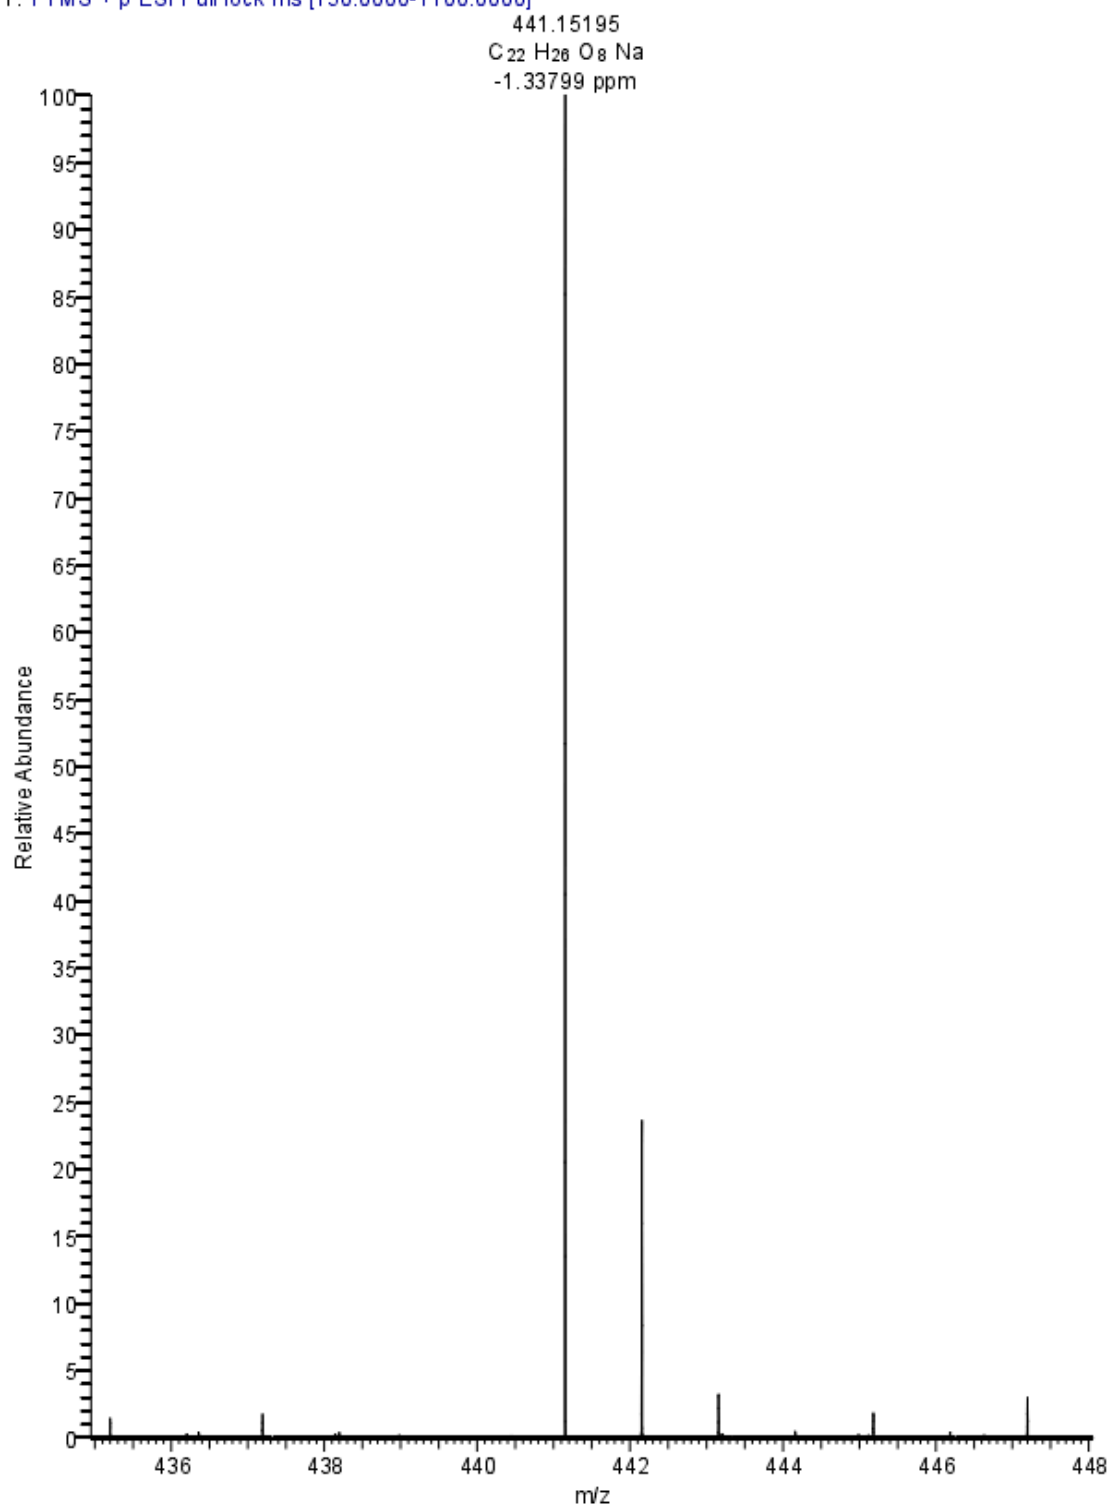



Figure S19  $^1\text{H}$  NMR spectrum of **3** in  $\text{CD}_3\text{OD}$

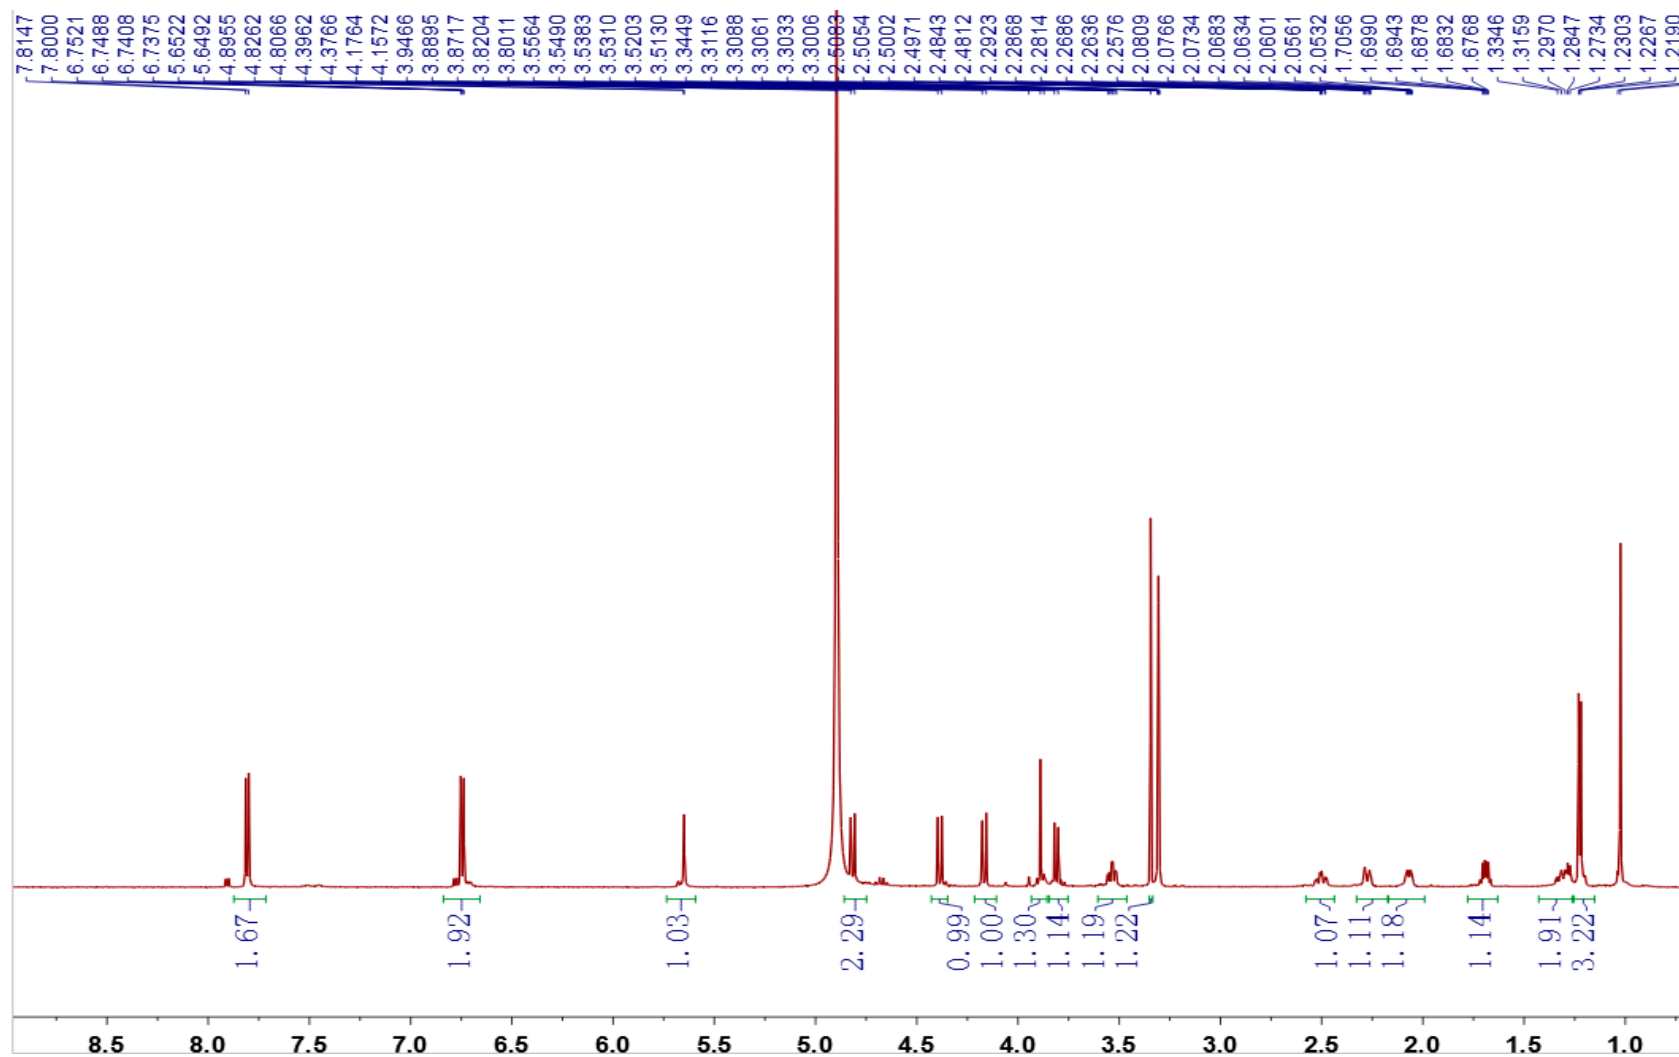

Figure S20  $^{13}\text{C}$  NMR spectrum of **3** in  $\text{CD}_3\text{OD}$

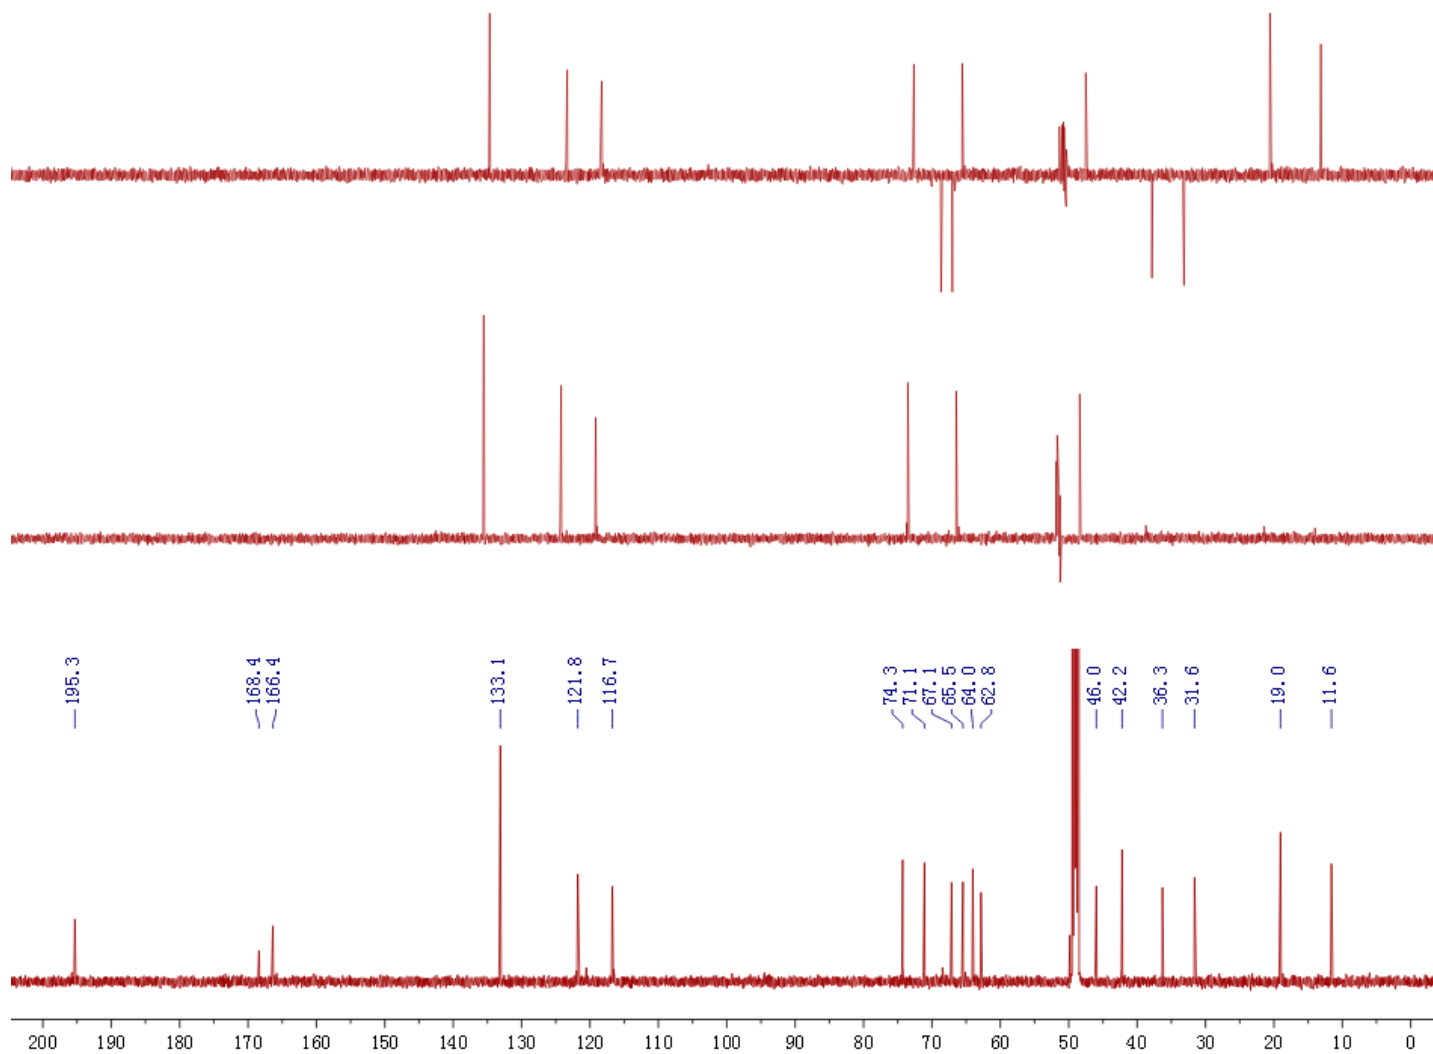

Figure S21 HSQC spectrum of **3** in CD<sub>3</sub>OD

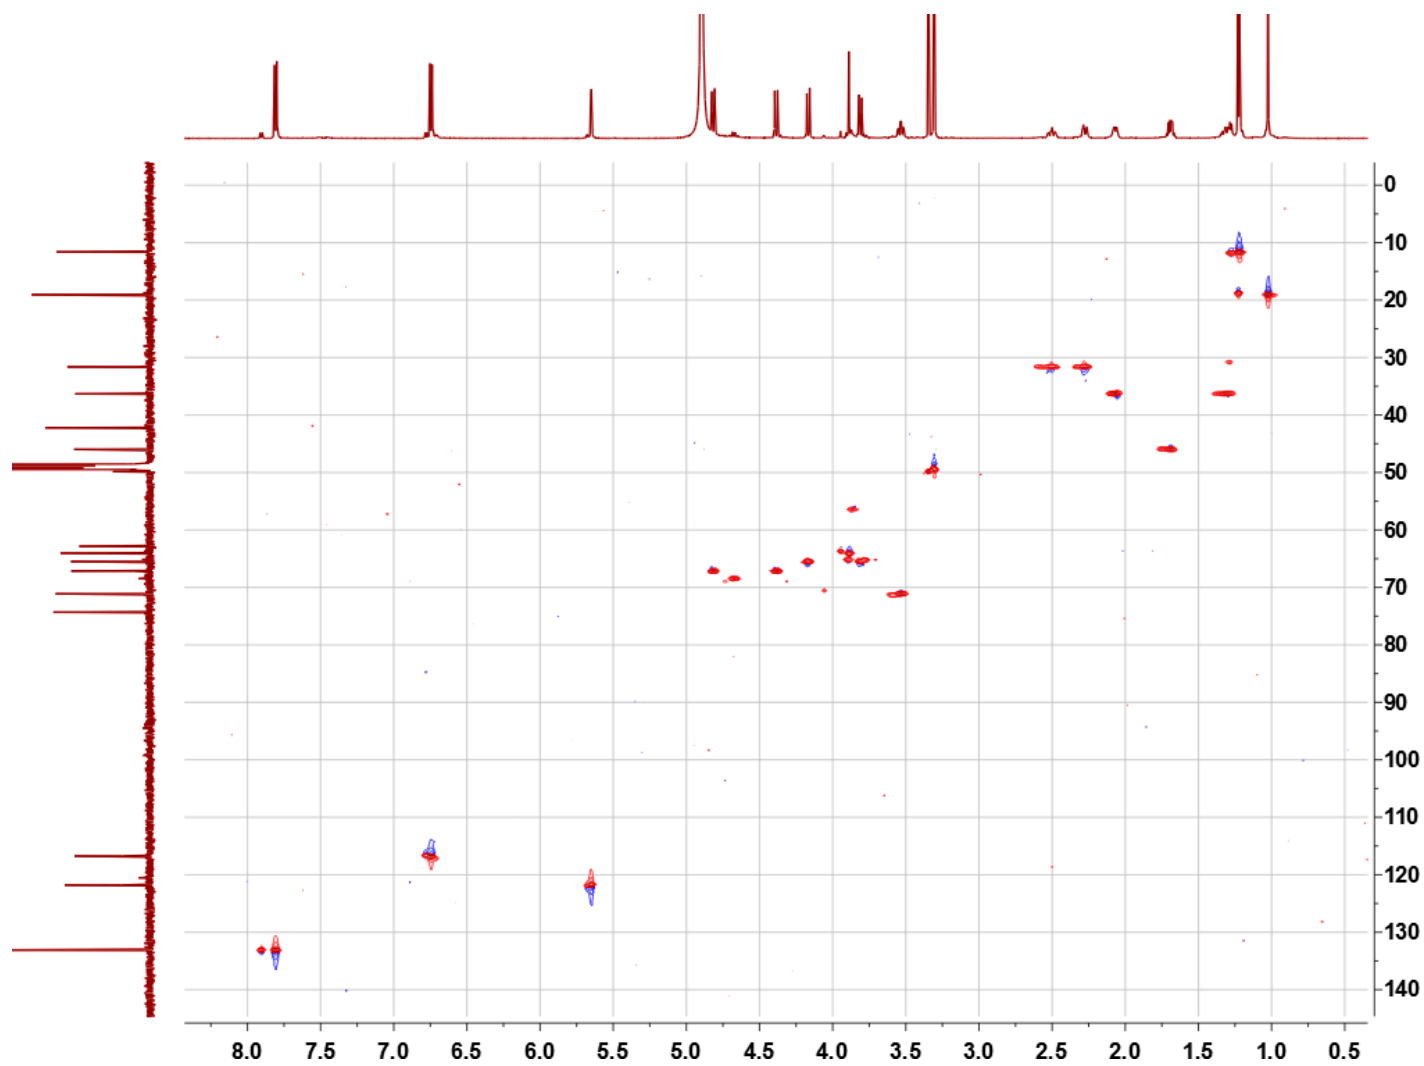

Figure S22 HMBC spectrum of **3** in CD<sub>3</sub>OD

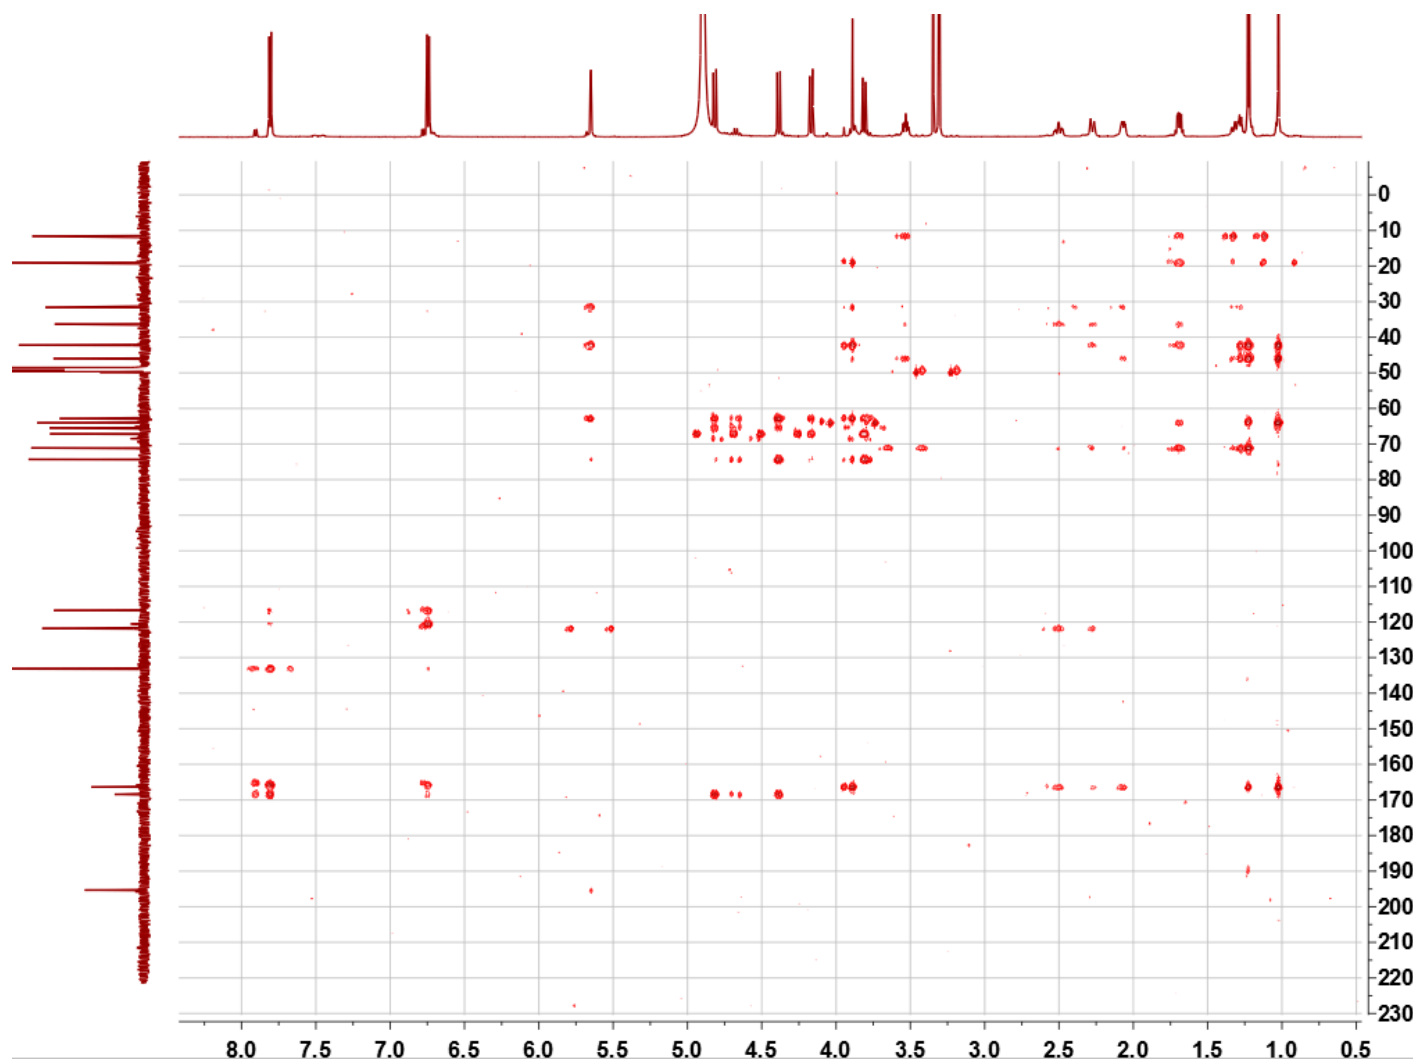

Figure S23 COSY spectrum of **3** in CD<sub>3</sub>OD

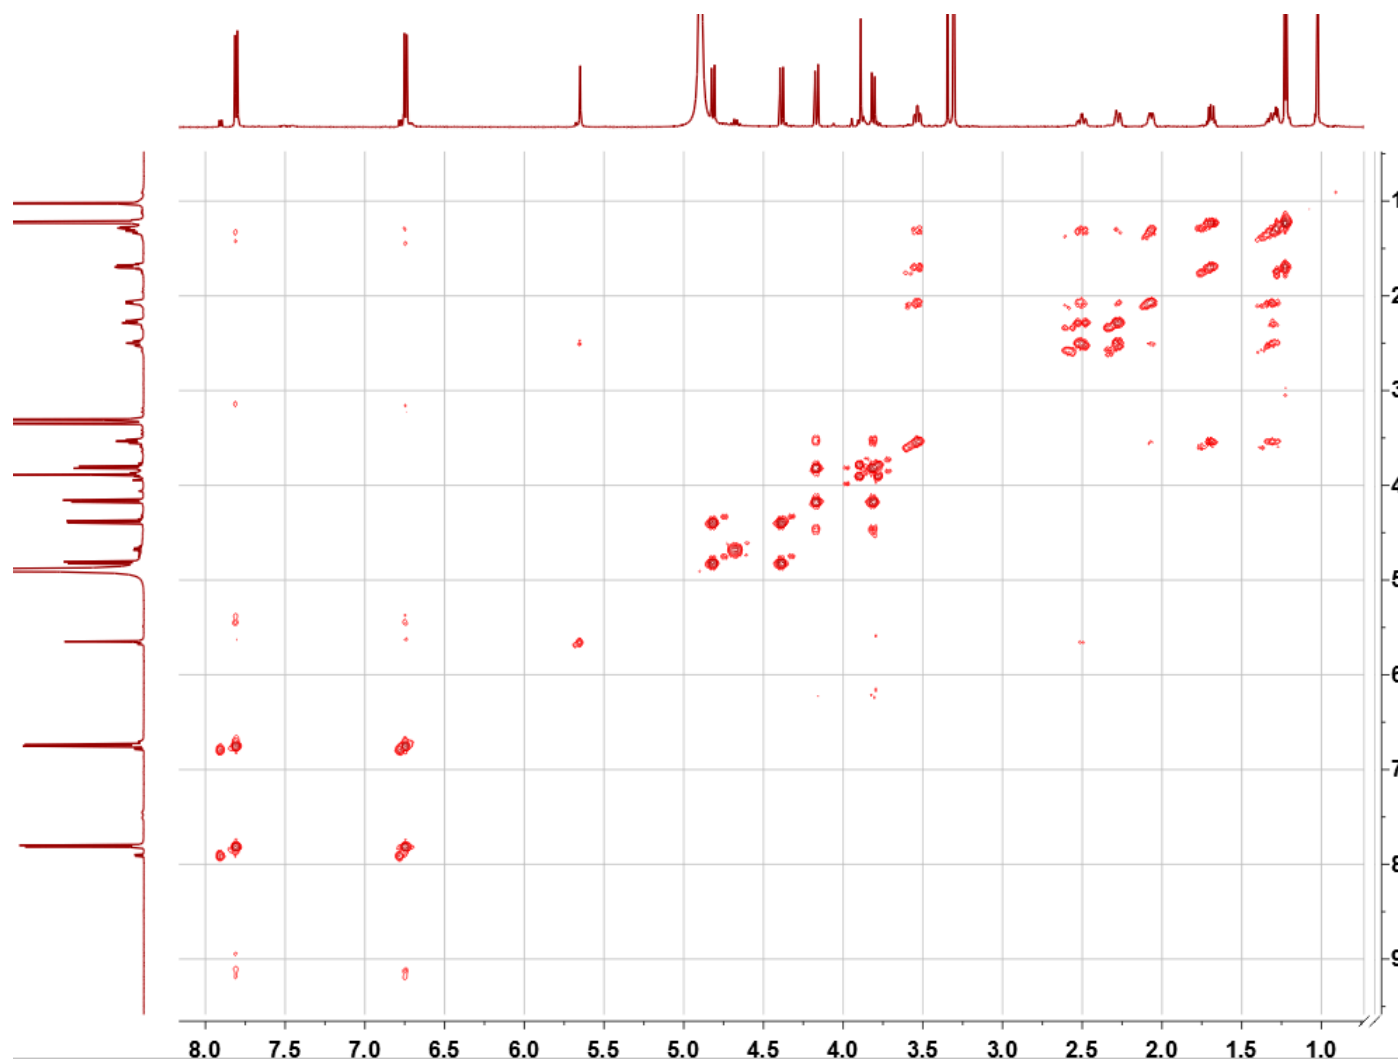

Figure S24 Roesy spectrum of **3** in CD<sub>3</sub>OD

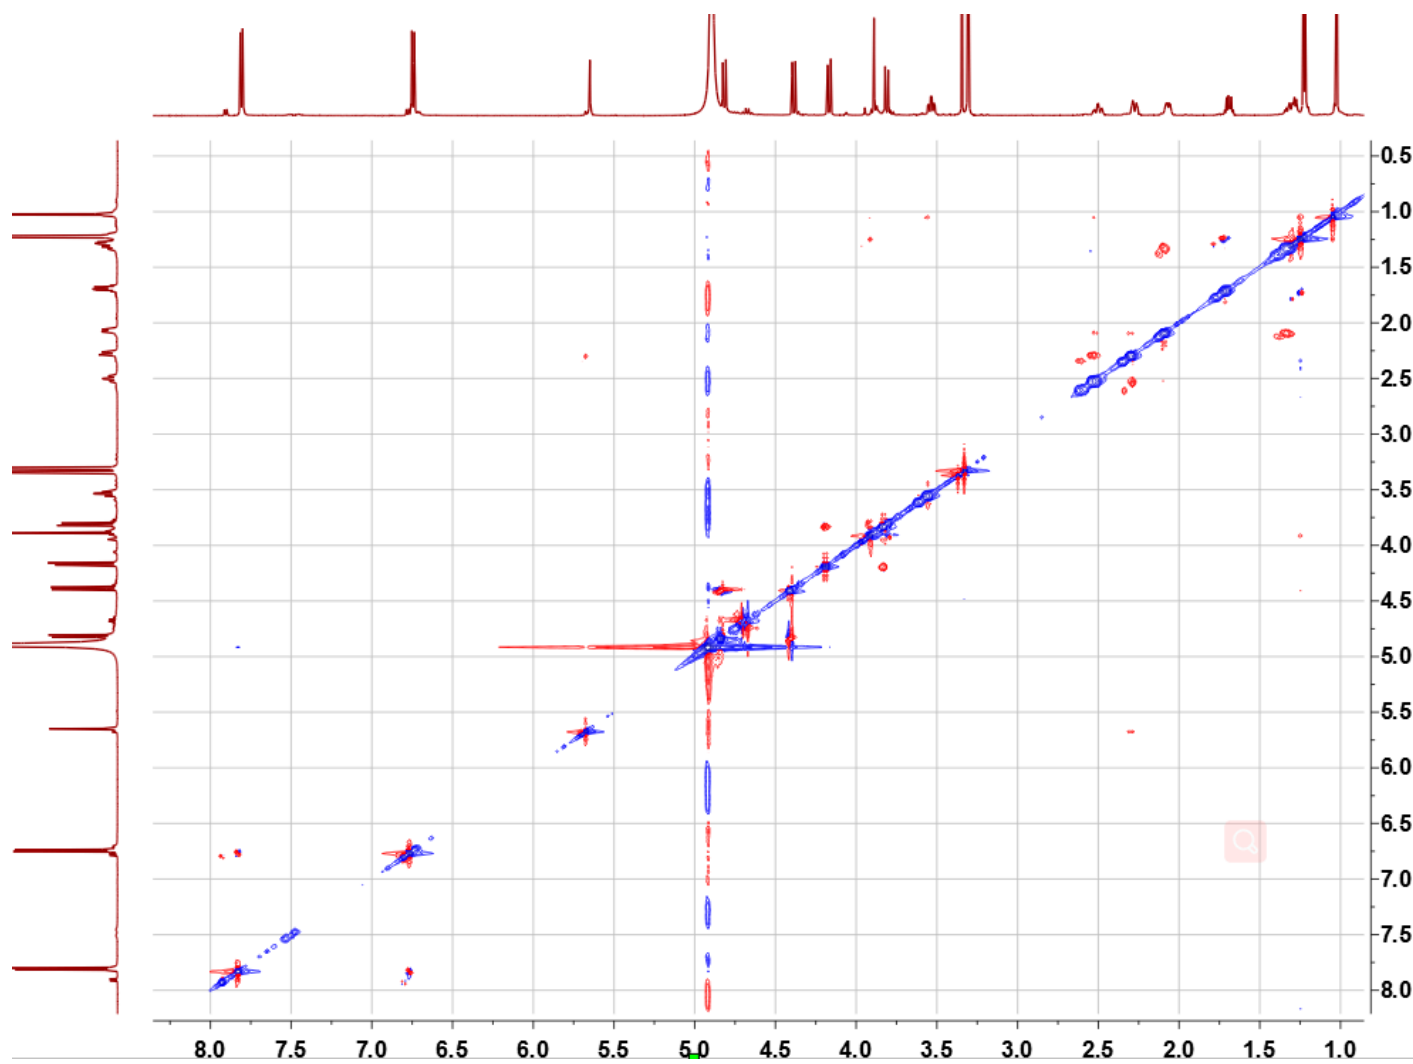

Figure S25 HRMS spectrum of **3**

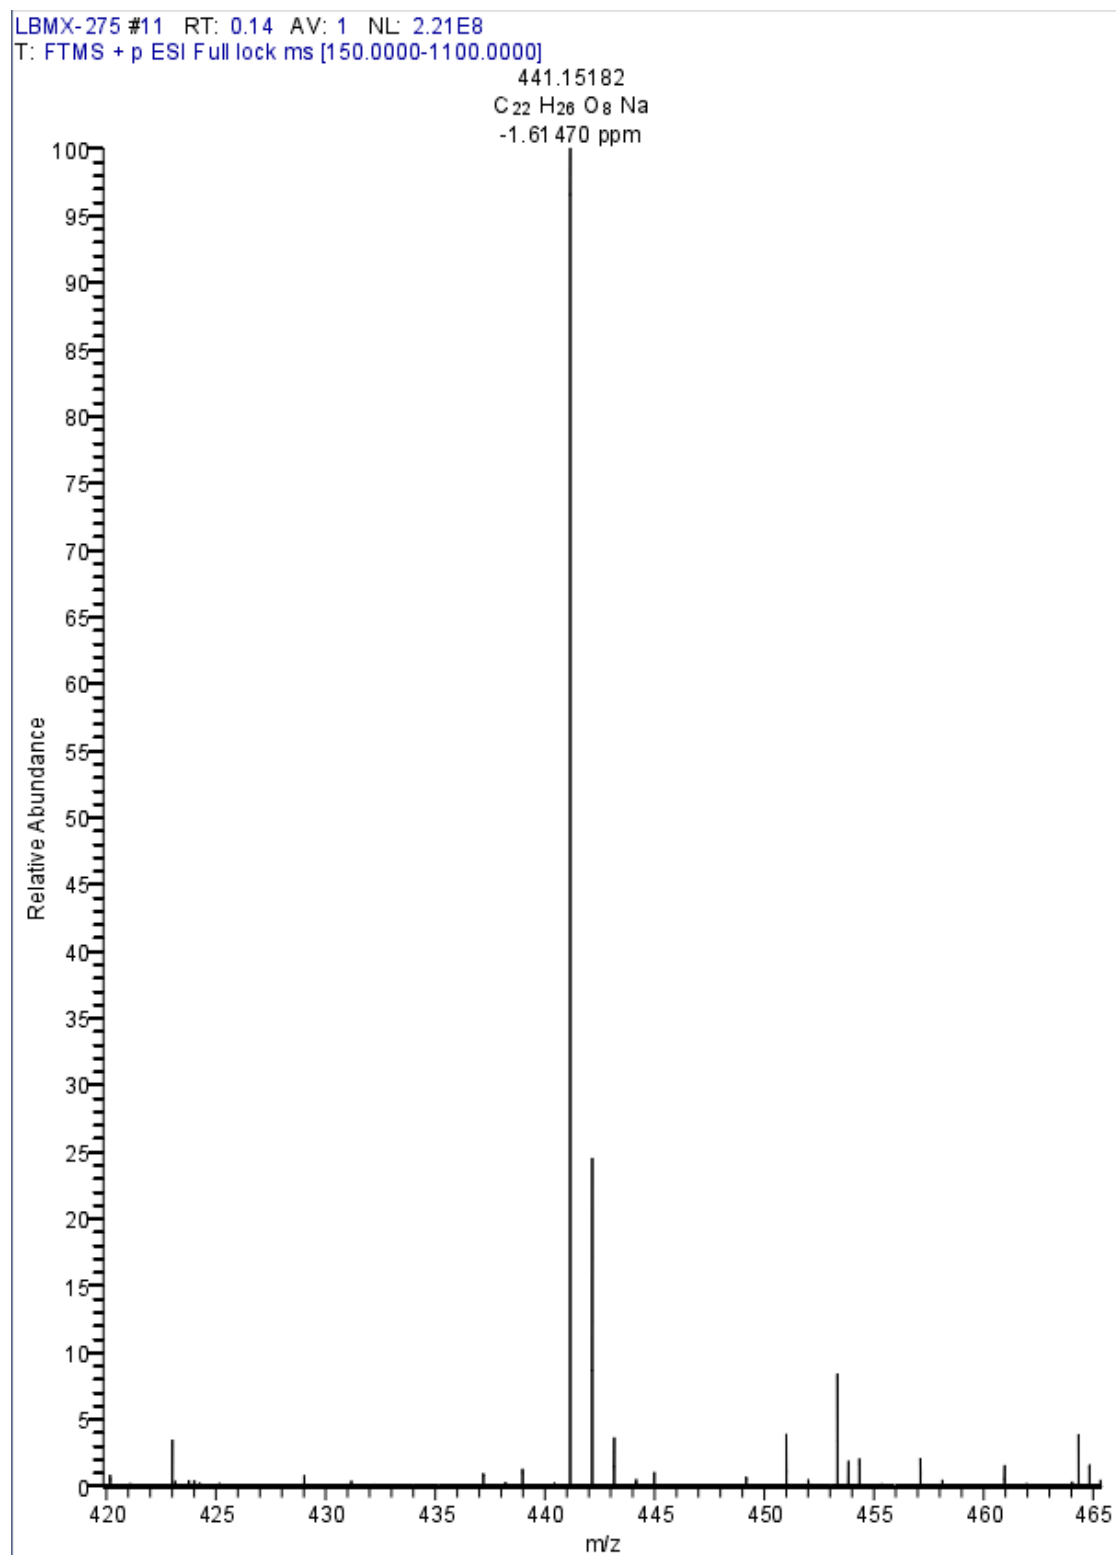

Figure S26  $^1\text{H}$  NMR spectrum of **4** in  $\text{CD}_3\text{OD}$

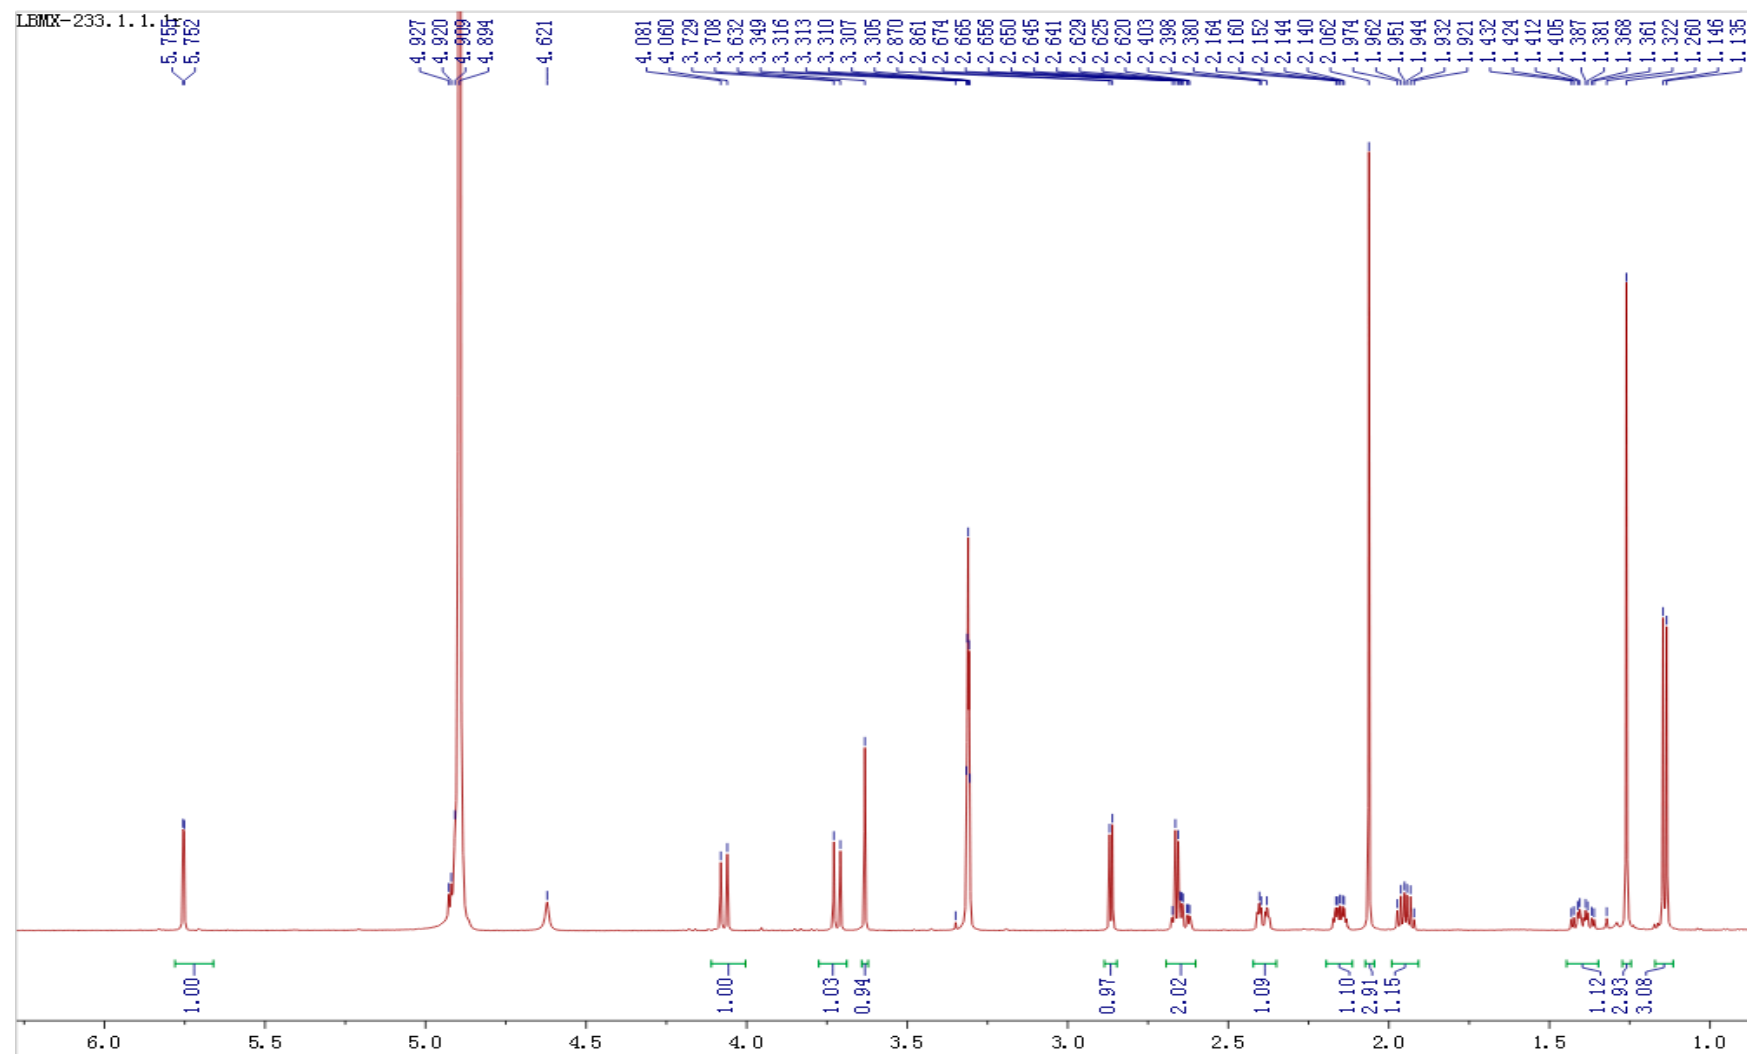



Figure S27  $^{13}\text{C}$  NMR spectrum of **4** in  $\text{CD}_3\text{OD}$

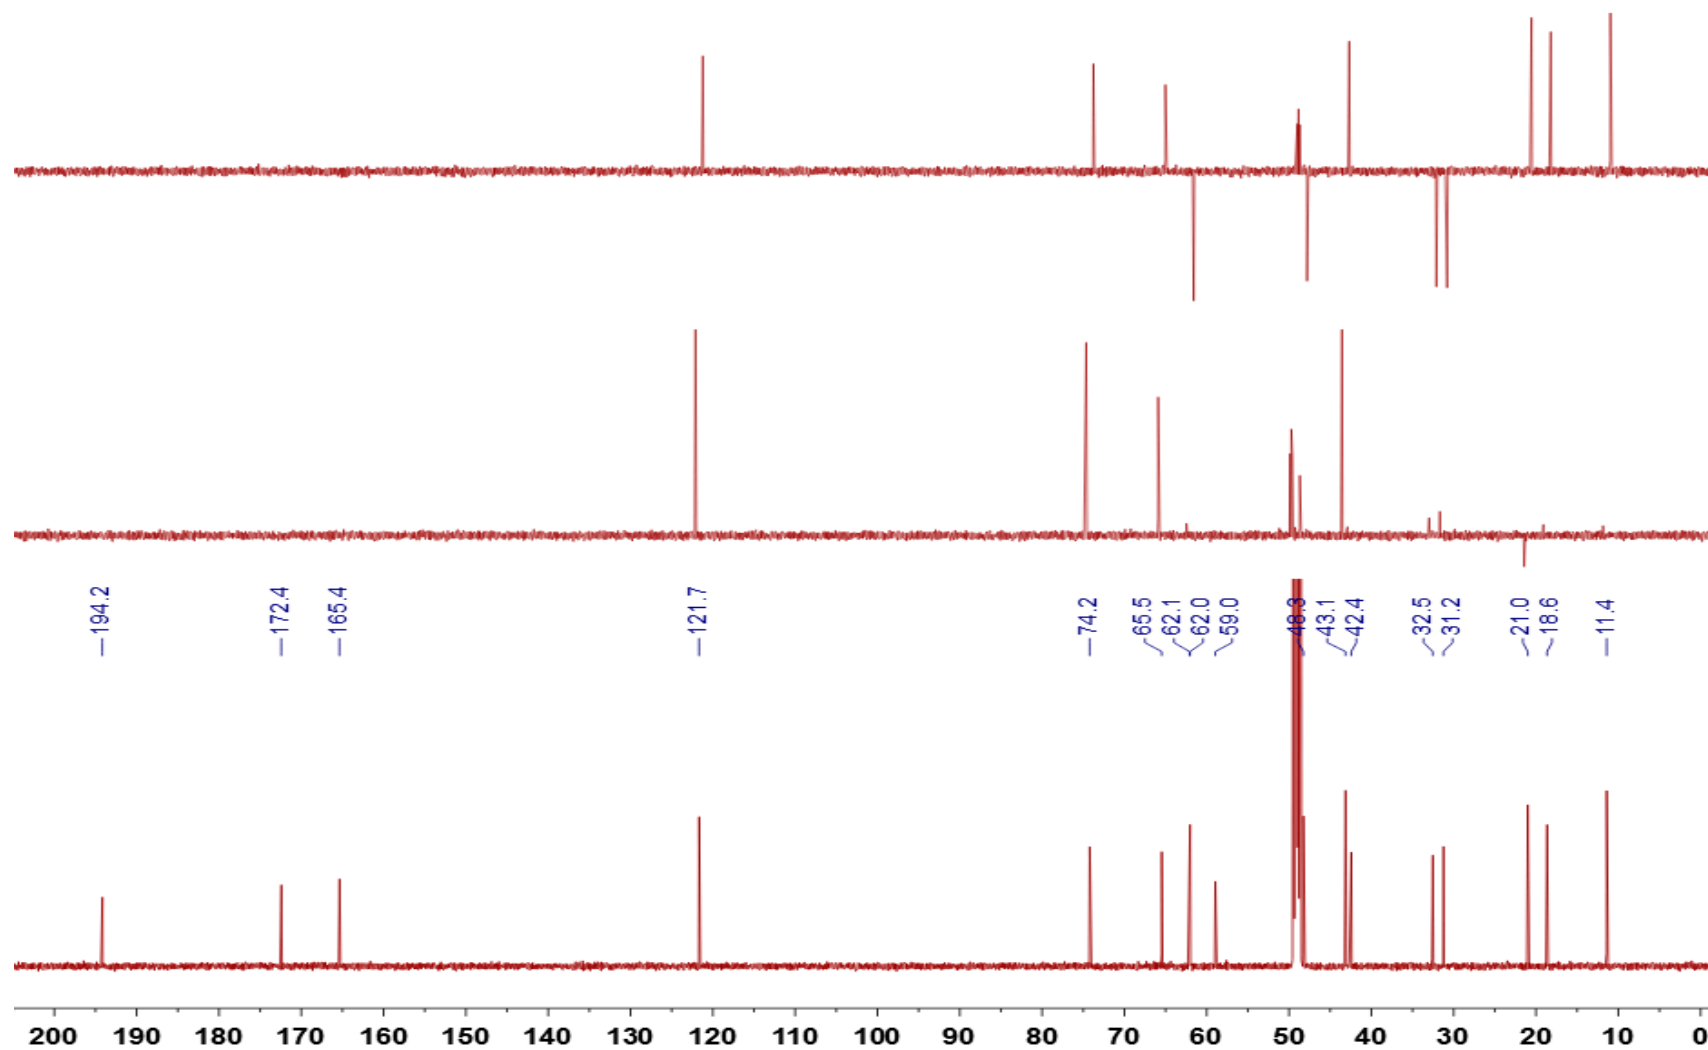

Figure S28 HSQC spectrum of **4** in CD<sub>3</sub>OD

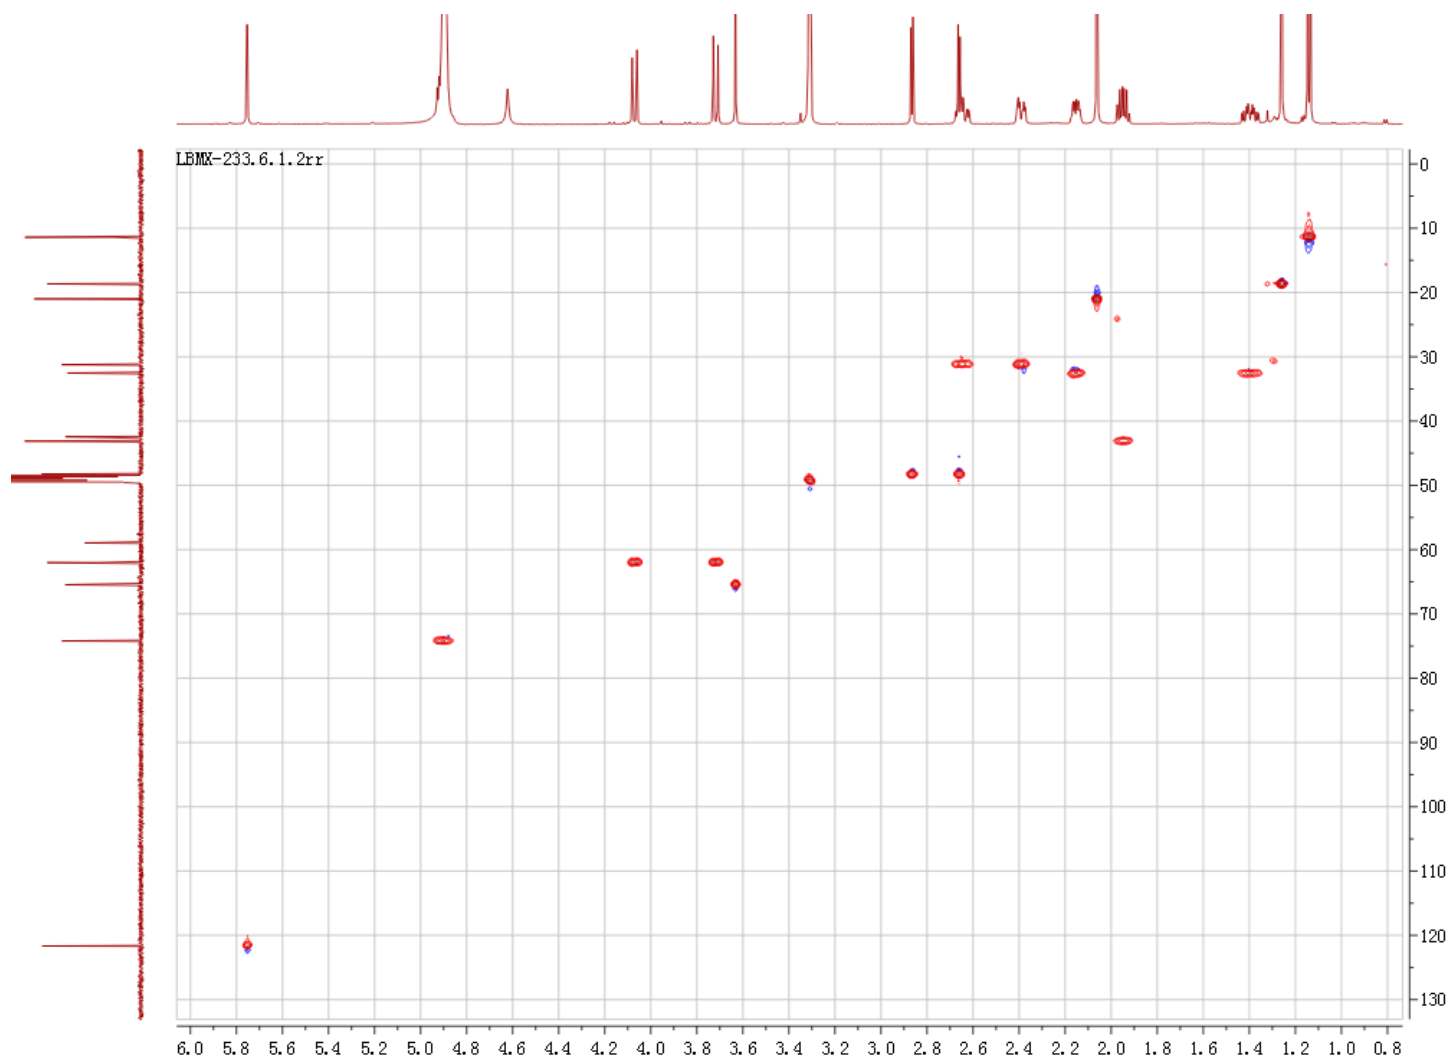

Figure S29 HMBC spectrum of **4** in CD<sub>3</sub>OD

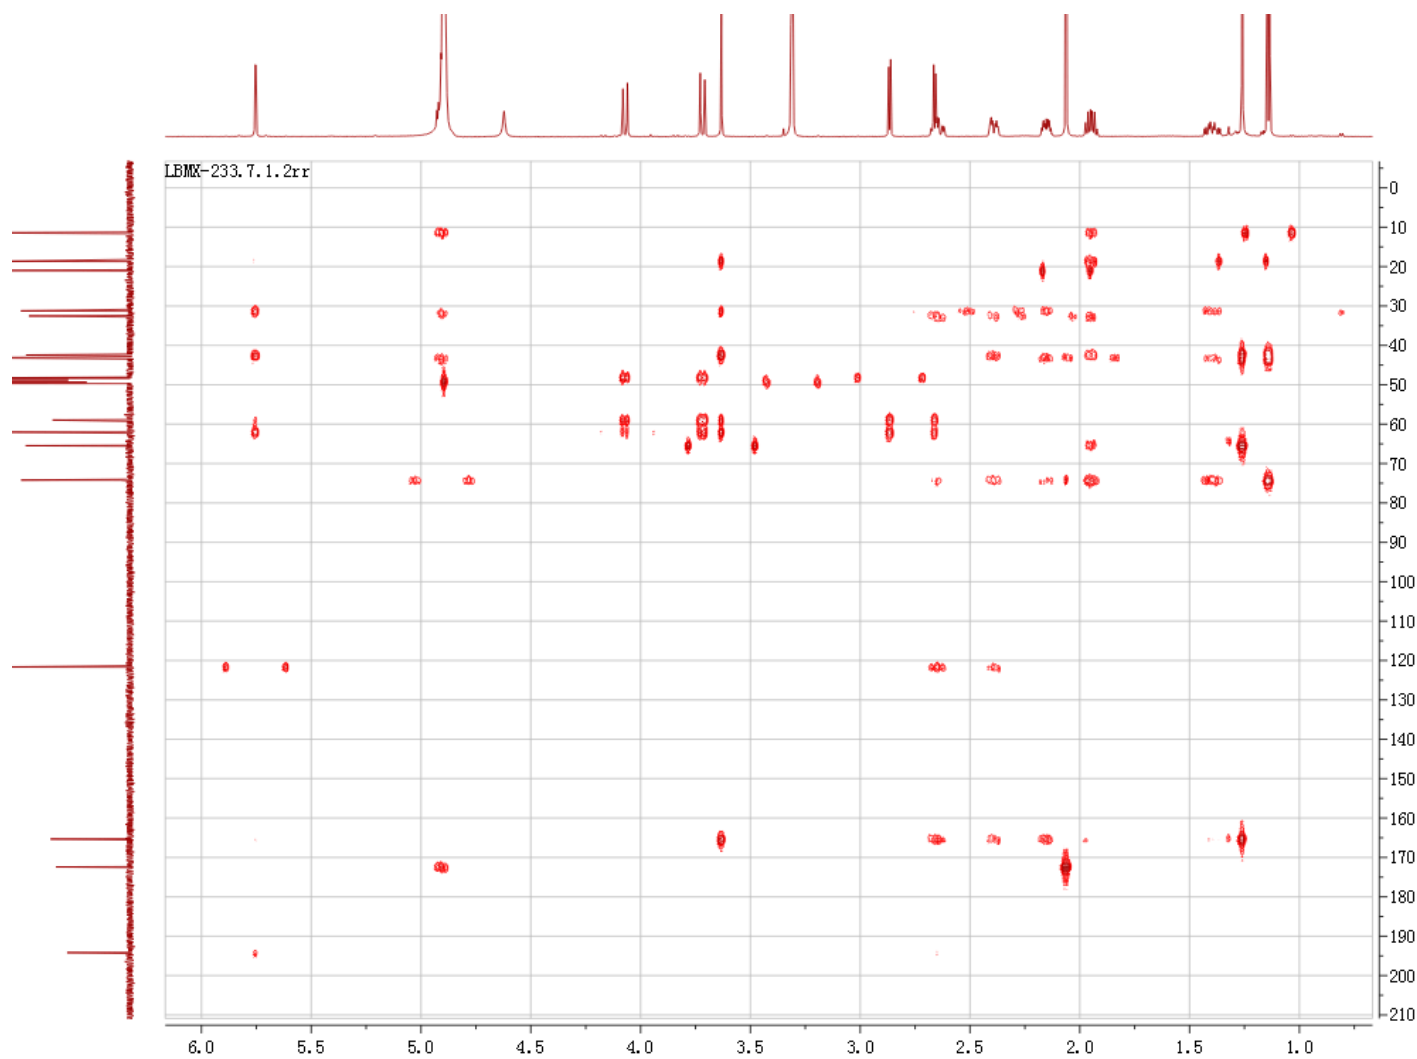

Figure S30 COSY spectrum of **4** in CD<sub>3</sub>OD

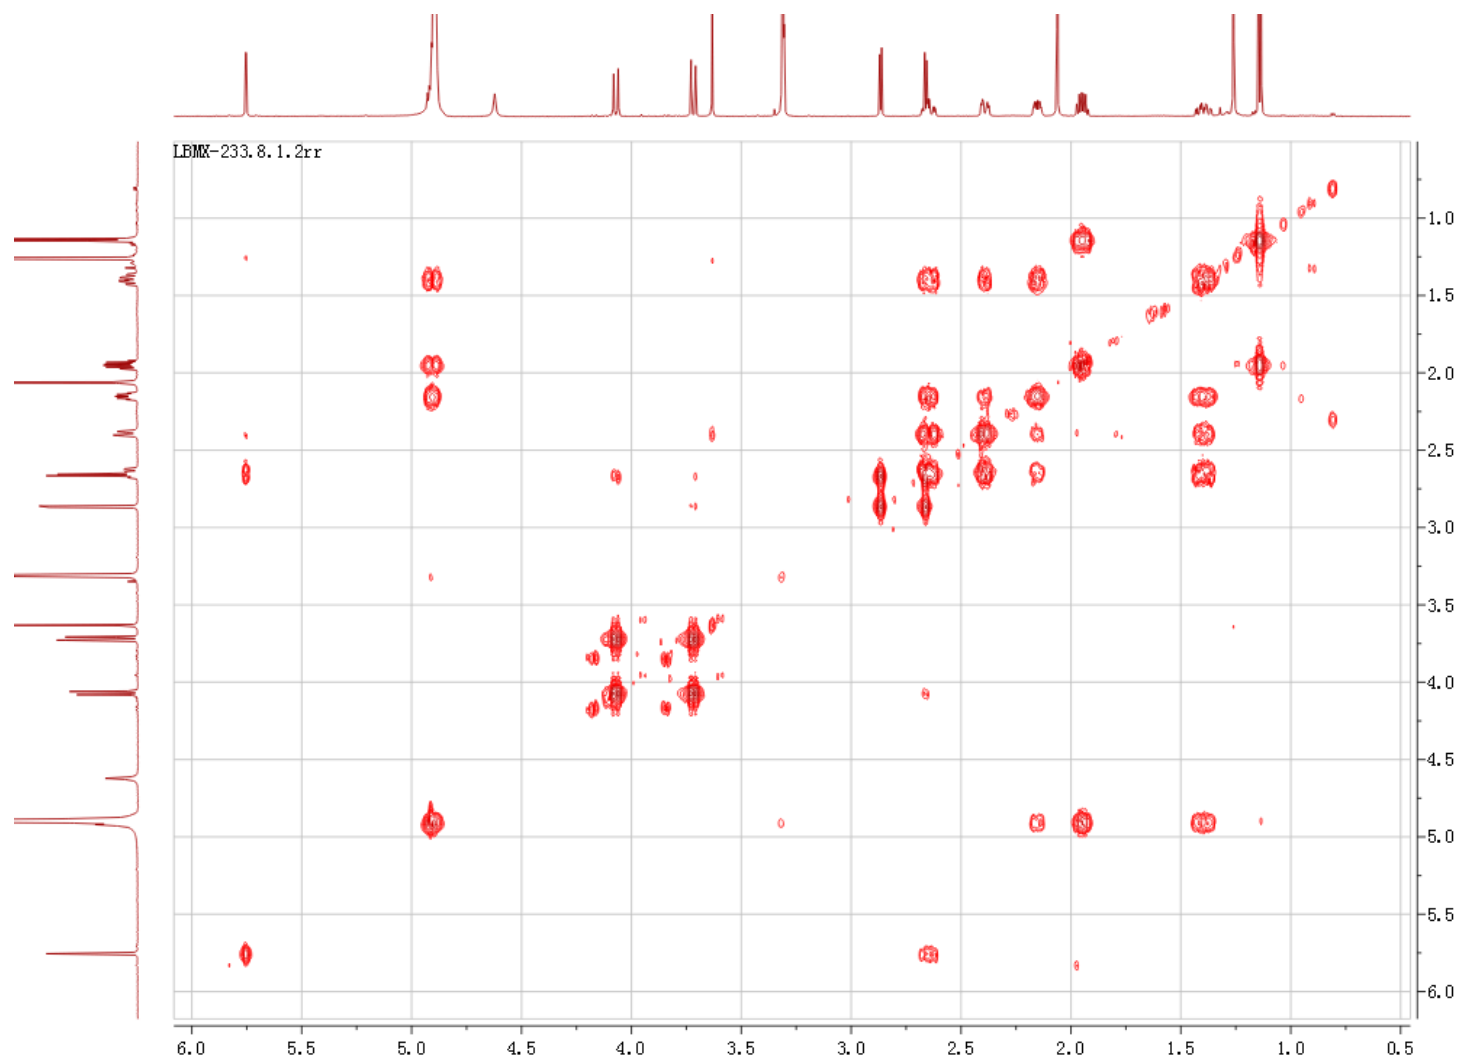

Figure S31 Roesy spectrum of 4 in CD<sub>3</sub>OD

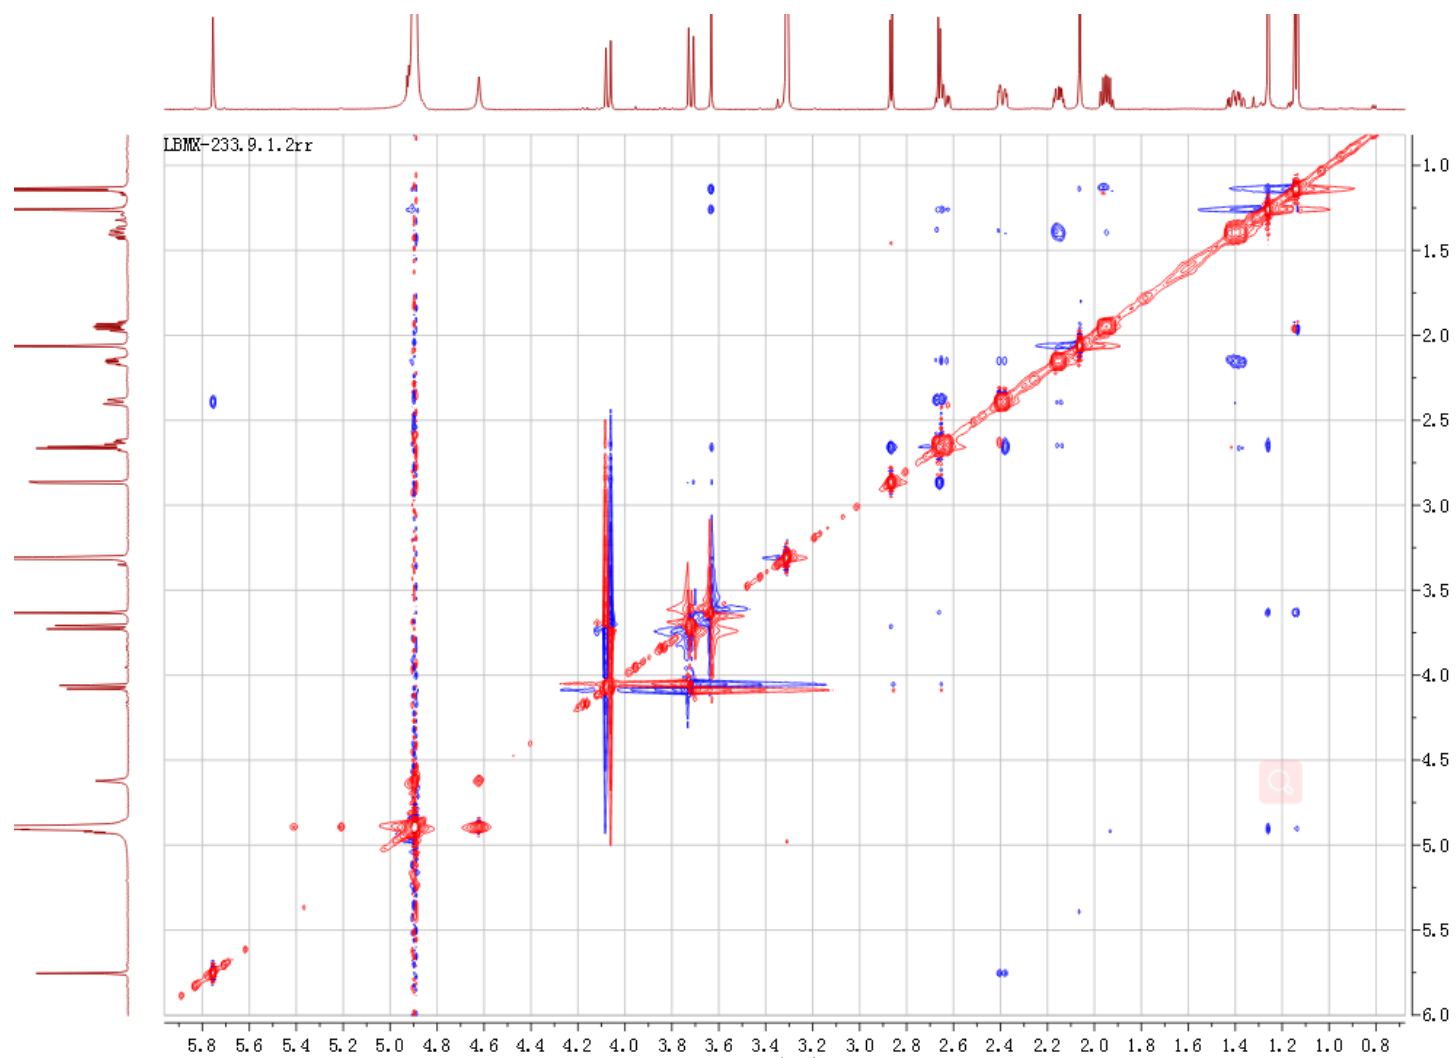

Figure S32 HRMS spectrum of **4**

LBMX-233 #13 RT: 0.17 AV: 1 SB: 8 1.32-1.53 NL: 1.58E8  
T: FTMS + p ESI Full ms [150.0000-1100.0000]

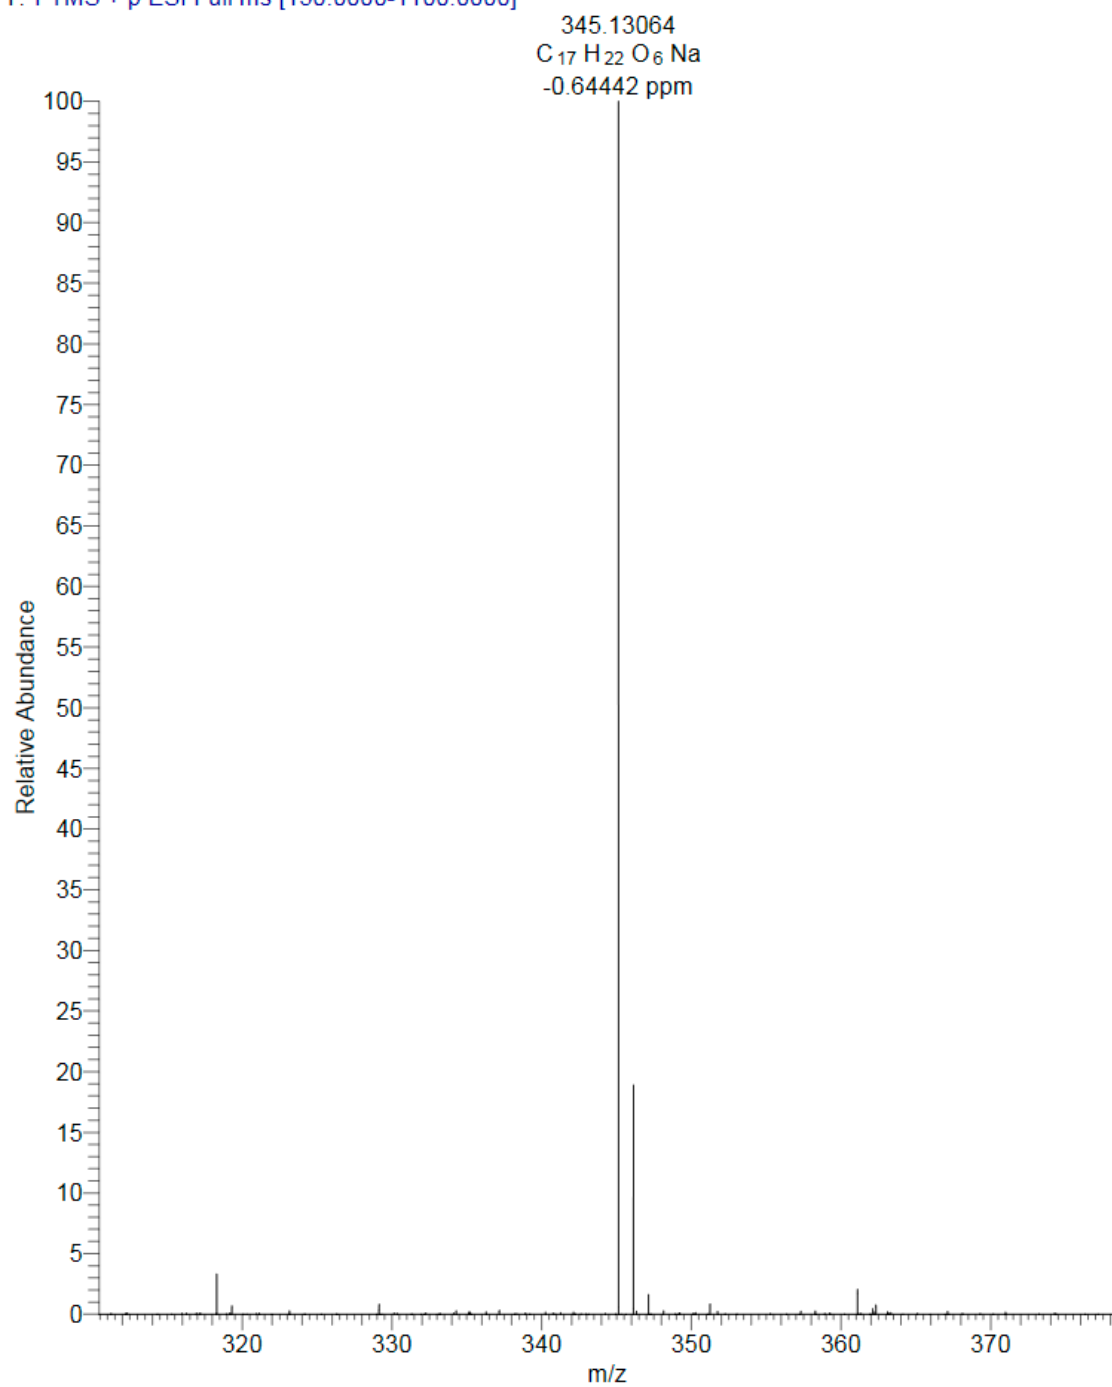

Figure S33 CD spectrum of **1-4** in MeOH

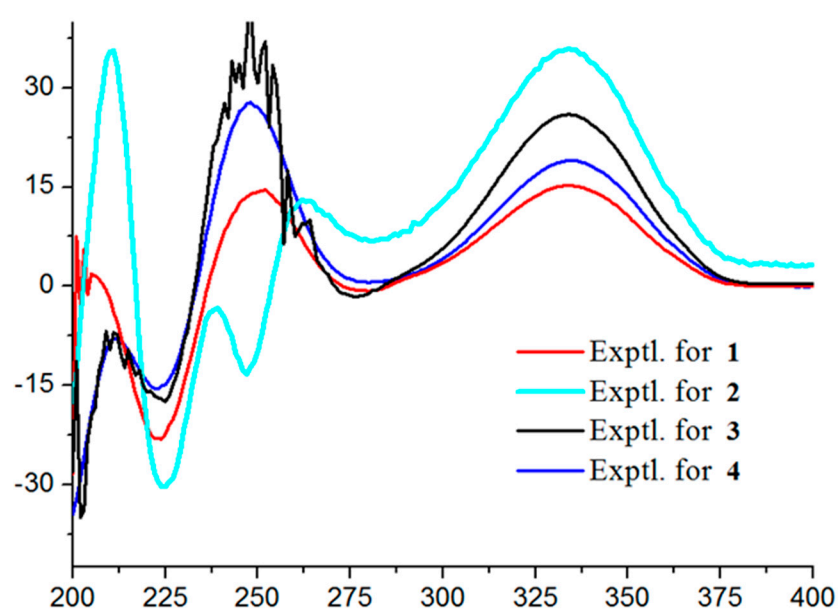

Supplement: s1 [file s1]
